# Supplementary material for: Unmasking health determinants and health outcomes for urban First Nations using respondent-driven sampling
Source: PubMed Central journal article supplement — BMJ Open. 2014 Jul 8;4(7):e004978. doi: 10.1136/bmjopen-2014-004978 (PMC4091271; doi:10.1136/bmjopen-2014-004978), 2014-07-08
Supplement: bmjopen-2014-004978.draft_revisions.pdf [file bmjopen-2014-004978.draft_revisions.pdf]

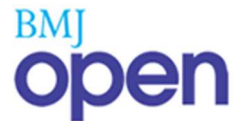

**Using Respondent Driven Sampling to Unmask Disparities in  
Social Determinants of Health and Health Outcomes for  
Urban First Nations People Living in Hamilton, Ontario**

|                                 |                                                                                                                                                                                                                                                                                                                                                                                                                                                                                       |
|---------------------------------|---------------------------------------------------------------------------------------------------------------------------------------------------------------------------------------------------------------------------------------------------------------------------------------------------------------------------------------------------------------------------------------------------------------------------------------------------------------------------------------|
| Journal:                        | <i>BMJ Open</i>                                                                                                                                                                                                                                                                                                                                                                                                                                                                       |
| Manuscript ID:                  | bmjopen-2014-004978                                                                                                                                                                                                                                                                                                                                                                                                                                                                   |
| Article Type:                   | Research                                                                                                                                                                                                                                                                                                                                                                                                                                                                              |
| Date Submitted by the Author:   | 31-Jan-2014                                                                                                                                                                                                                                                                                                                                                                                                                                                                           |
| Complete List of Authors:       | Firestone, Michelle; St. Michaels Hospital, Centre for Research on Inner City Health<br>Smylie, Janet; University of Toronto, Dalla Lana School of Public Health<br>Maracle, Sylvia; Ontario Federation of Indian Friendship Centres,<br>Spiller, Michael; Cornell University,<br>De dwa da dehs ney>s, Aboriginal Health Access Centre; De dwa da dehs ney>s Aboriginal Health Access Centre,<br>O'Campo, Patricia; St. Michael's Hospital, Centre for Research on Inner City Health |
| <b>Primary Subject Heading</b>: | Public health                                                                                                                                                                                                                                                                                                                                                                                                                                                                         |
| Secondary Subject Heading:      | Public health, Research methods, Epidemiology                                                                                                                                                                                                                                                                                                                                                                                                                                         |
| Keywords:                       | PUBLIC HEALTH, EPIDEMIOLOGY, SOCIAL MEDICINE                                                                                                                                                                                                                                                                                                                                                                                                                                          |
|                                 |                                                                                                                                                                                                                                                                                                                                                                                                                                                                                       |

SCHOLARONE™  
Manuscripts

Only

1  
2  
3  
4 **Using Respondent Driven Sampling to Unmask Disparities in Social Determinants**  
5 **of Health and Health Outcomes for Urban First Nations People Living in Hamilton,**  
6 **Ontario**  
7

8  
9 Firestone M., Maracle S., Spiller M., De dwa da dehs ney>s Aboriginal Health Access  
10 Centre, O'Campo P.  
11

12 **Corresponding Author:**

13 Firestone, Michelle  
14 Post-Doctoral Fellow, Centre for Research on Inner City Health (CRICH), St. Michael's  
15 Hospital  
16 209 Victoria, 3rd floor  
17 Toronto, Ontario Canada M5B 1C6  
18 Email: firestonem@smh.ca  
19 Phone: 416-864-6060 ext 77437  
20 Fax: 416-864-5558  
21  
22  
23

24 Smylie, Janet  
25 Research Scientist, Centre for Research on Inner City Health (CRICH)  
26 Associate Professor, Department of Public Health Sciences, University of Toronto  
27 Toronto, Canada  
28  
29

30 Maracle, Sylvia  
31 Executive Director, Ontario Federation of Indian Friendship Centres (OFIFC)  
32 Toronto, Canada  
33  
34

35 De dwa da dehs ney>s Aboriginal Health Access Centre (DHAC)  
36 Hamilton, Canada  
37

38 O'Campo, Patricia  
39 Director, Centre for Research on Inner City Health  
40 Professor, Dalla Lana School of Public Health, University of Toronto  
41 Toronto, Canada  
42  
43

44 **Keywords:** Canada; urban Aboriginal health; First Nations; Respondent-Driven  
45 Sampling; Community-based Research  
46

47 **Word Count:** 2,964  
48  
49  
50  
51  
52  
53  
54  
55  
56  
57  
58  
59  
60

## ABSTRACT

**Objective:** Population based health information on urban Aboriginal populations in Canada is limited due to challenges with the identification of Aboriginal persons in existing health datasets. By implementing Respondent Driven Sampling (RDS), the Our Health Counts study in partnership with De dwa da dehs ney>s Aboriginal Health Access Centre (DAHC) aimed to generate a representative sample of First Nations individuals living in Hamilton, Ontario.

**Design:** Respondent-Driven Sampling.

**Setting:** Hamilton, Ontario, Canada.

**Participants:** 554 First Nations adults living in Hamilton were recruited using RDS.

**Results:** Among First Nations adults living in Hamilton, 78% earned less than \$20,000 per year and 70% lived in the lowest income quartile neighbourhoods. Mobility and crowded living conditions were also highly prevalent. Common chronic diseases included arthritis, hypertension, diabetes and COPD and rates of emergency room access were elevated.

**Conclusions:** RDS is an effective sampling method in urban Aboriginal contexts as it builds upon existing social networks and successfully identified a population-based cohort. The findings illustrate striking disparities in health determinants and health outcomes between urban First Nations individuals and the general population.

## ARTICLE SUMMARY

### Strengths and limitations of this study:

- Our study is the first in Canada to provide population based health assessment data for urban First Nations, documenting striking health and social inequities
- This study models best practices in academic-Aboriginal community research partnerships
- RDS has been demonstrated to be a promising tool for generating Aboriginal health assessment measures in urban areas where there are limited existing sampling frame options
- At present, multivariable regression analyses using RDS samples have not appropriately addressed the co-relation between observations and the unequal sampling probabilities inherent in RDS; therefore we present prevalence estimates for which methods are better established

## INTRODUCTION

According to the 2006 Census, over 60% (150,570 people) of Aboriginal<sup>a</sup> people living in Ontario live in urban areas.[1] Nearly seven out of ten Métis live in urban areas, and about three out of every four people in the off-reserve First Nations population live in urban areas.[1] First Nations people have historically been dislocated from their original homelands and may constitute diasporic, heterogeneous communities in urban areas.[2] Specifically, an increasing number of First Nations individuals are moving to urban centres to seek better housing, employment and education opportunities and for the services and amenities available.[3-5] According to the Canadian Census, First Nations, Inuit, and Métis populations experience ongoing disparities in social determinants of health such as income insecurity, unemployment, low levels of education, decreased food availability, and inadequate housing compared to non-Aboriginal Canadians, and these disparities are exacerbated with urban residence.[1,6,7]

Despite the growing size of the urban Aboriginal population in Canada, accessible and culturally relevant population health data for this population are almost non-existent.[8-11] While census data do exist, there are serious deficits in population health measures.[11] Some of the reasons behind this deficiency are limitations in the current health information system and data collection processes with respect to Aboriginal peoples.[12,13] Sampling frames are often biased and comprise non-random subpopulations such as lists of members or clients of particular programs and services in the community. When urban Aboriginal people have been included in census-based national surveys, these surveys were underpowered and often First Nations, Inuit, and Métis data could not be successfully disaggregated.[12,14] Additionally, studies based on Census data show that a significant number of Aboriginal people move from rural and reserve areas to cities, and back and forth as well as within and among cities.[4,15] These factors make it difficult to get reliable counts of the Aboriginal population of a city.

At the national level, the continued inability to identify Aboriginal peoples in healthcare databases leads to very poor coverage of Aboriginal populations in Canada, with a specific paucity of health information for First Nations, Métis, and Inuit living in urban areas. Provincial and territorial systems generally do not collect ethnic-specific utilization data, and their ethnic flags for vital statistics are inconsistent or absent.[16] The federal government's decision to cancel the long form of the Canadian national

---

<sup>a</sup> "Aboriginal people" is a collective name for all of the original peoples of Canada and their descendants. The *Constitution Act* of 1982 specifies that the Aboriginal Peoples in Canada consist of three groups: Indians, Inuit and Métis. The term First Nations came into common use in the 1970s to replace Indian, which some people found offensive. Despite its widespread use, there is no legal definition for this term in Canada. In the United States, the term "Native American" is used to represent Indigenous peoples from North America, including Mexico. For alignment with the US Constitution and to ensure policy implications, the term "American Indian" is still used for Indigenous populations living within US borders, particularly the lower 48 states and parts of Alaska. "Indigenous" is a term used in the international context.

1  
2  
3 census will further challenge the ability of researchers and communities to identify and  
4 address social inequities across ethnic groups and will widen the existing health and  
5 social policy vacuum.[17,18]  
6  
7

8 In the absence of an accessible and accurate population based sampling frame for  
9 urban Aboriginal people, we implemented respondent driven sampling (RDS) for the Our  
10 Health Counts (OHC) study. RDS, like other chain-referral approaches, relies on  
11 members of a population to recruit their peers.[19,20] However, RDS differs from other  
12 methods because of estimation procedures that adjust for the participants' different  
13 probabilities of being sampled.[20] RDS also differs from other chain-referral methods  
14 because the number of recruitments any participant can make is limited, and it employs a  
15 dual incentive structure where participants are rewarded both for participating and for  
16 recruiting their peers.[21]  
17  
18

19 There is limited literature on RDS in Indigenous contexts;[22] however, there is  
20 evidence that links the success of RDS to the strength of social networks and  
21 relationships.[23] Indigenous knowledge is wholistic, relational and embraces a fluidity  
22 that allows for constant growth and change.[24,25] Aboriginal identity values the group  
23 over the individual, thereby establishing models of kinship whereby everyone has the  
24 right to give and receive according their own choices.[24] Therefore, we hypothesized  
25 that RDS would be an appropriate and effective sampling methodology as it builds on  
26 social networks and would draw on existing kinship systems known to be present in  
27 Indigenous communities.[26]  
28  
29  
30

31 The main objective of the OHC project was to work in partnership with  
32 Aboriginal stakeholders to generate a culturally relevant, representative baseline health  
33 data set for three urban Aboriginal communities in Ontario, Canada. The results  
34 presented here pertain specifically to the urban First Nations population in Hamilton  
35 where the organizational project lead was the Ontario Federation of Indian Friendship  
36 Centres (OFIFC) and the community partner was De dwa da dehs ney>s Aboriginal  
37 Health Access Centre (DHAC).  
38  
39

## 40 **METHODS**

### 41 **Community-based participatory research**

42  
43 This study upheld current ethical and scientific standards in Indigenous health  
44 research[27-31] through a community based participatory research partnership between  
45 the academic research team, OFIFC and DHAC. Data sharing and research agreements  
46 ensured that DHAC led the governance and management of data throughout the course of  
47 the study. In addition, a Governing Council, comprised of representatives from the core  
48 urban Aboriginal provincial organizations was established to oversee all stages of the  
49 research process. All members of the study team were from the Aboriginal community,  
50 living in the general vicinity of the city of Hamilton. Formal ethics approval was  
51 provided by the Research Ethics Board of St. Michael's Hospital in Toronto, Canada and  
52 the OHC Governing Council.  
53  
54  
55  
56  
57  
58  
59  
60

## Study Site

The City of Hamilton is located in southern Ontario on what was traditionally Haudenosaunee (Iroquian) territory and is near two First Nations reserves: Six Nations of the Grand River and Mississaugas of the New Credit. According to the 2006 Census, the total Aboriginal population in Hamilton was 13,735 people, comprising 2.8% of the total population of the city.[32] The OFIFC identified the city of Hamilton as a promising community site based on its significant Aboriginal population and strong infrastructure of Aboriginal community services.

## Recruitment

The RDS process was initiated through the purposive selection of individuals to begin recruitment, also called “seeds.” Inclusion criteria for participation in the study included 18 years of age, residence within the geographic boundaries of the City of Hamilton and self-identified as having First Nations identity. With the help of community partners, six seeds were identified and agreed to participate. Five of the six seeds produced referrals within the two weeks leading up to the December 2009 holiday closure at DAHC. In February and March 2010, three additional seeds were added.

Study participants, including seeds, provided informed consent and then completed a health assessment survey after which they received 3-5 coded coupons to refer a member of their social network into the study. Following the holiday closure of DHAC, the number of distributed coupons per recruit was increased from 3 to 5 in order to increase the rate of recruitment. Participants received a monetary reimbursement of \$20 for their time and participation. They also received an additional \$10 for every eligible person they recruited into the study. Study recruitment and interviews took place in an Aboriginal community centre.

For sample size calculation, we assumed 95% confidence intervals (CI), survey item prevalence ranges from 10% to 75% and a design effect of 2.[33] Based on this formula, the OCH study aimed to recruit 500 First Nations adults and 250 children.

## Sources of Data

Community concept mapping was implemented to develop a community specific survey for First Nations in Hamilton, [34] which was comprised of 8 domains covering areas such as sociodemographics, physical, mental, and emotional health, First Nations identity and impacts of colonization, and access and barriers to care. The survey tool was piloted with First Nations community members, and minor modifications were made to improve face validity. Data were collected and compiled by computer-assisted personal interviewing with a computer based version of the survey tool developed by the research team using SPSS Data Collection Author and Collector.[35]

Upon completion of recruitment and survey, our sample of First Nations adults was linked to data holdings at the Institute of Clinical Evaluative Sciences (ICES) including provincial records of emergency room and hospital visits (Canadian Institutes of Health Information – Discharge Abstract Database and National Ambulatory Care

Reporting System: Emergency), and neighbourhood income quintiles (derived from Census data). Using health care system identification numbers (i.e. Ontario Health Card) provided by participants, we successfully linked 92% (N=725) of First Nations adults to the ICES database.

## Analysis

Recruitment dynamics, adjusted population based estimates and confidence intervals were calculated using the RDS-I enhanced data smoothing estimator in the custom RDSAT software (version 7.1).[36] The RDS methodology anticipates that personal networks are not randomly distributed, and therefore adjusts for small to moderate levels of network clustering (people who have ties to others like them), in the form of post-sampling weights.

## RESULTS

Among First Nations adults in Hamilton, 78.9% of participants were recruited via referral trees originating from two seeds. With 19 and 32 waves respectively, the lengths of both of these recruitment chains were long enough to overcome the original sampling bias, which usually happens after 6 or 7 waves of recruitment.[37]

Over a period of four and a half months a total of 790 persons were recruited, including 554 adults and 236 children. Demographic and social characteristics are presented in Table 1.

**Table 1. Demographic and social characteristics of First Nations adults (Total N=554)**

| Characteristic                                                                  | Prevalence % (95% CI) |
|---------------------------------------------------------------------------------|-----------------------|
| <b>Sex</b>                                                                      |                       |
| Male                                                                            | 59.9 (53.3, 67.2)     |
| <b>Age</b>                                                                      |                       |
| 18-34                                                                           | 40.2 (33.3, 48)       |
| 35-49                                                                           | 35.4 (28.7, 41.6)     |
| 50+                                                                             | 24.4 (18.4, 30.8)     |
| <b>Education</b>                                                                |                       |
| Some high school or less                                                        | 57.3 (51.1, 64)       |
| Completed high school                                                           | 19.5 (14.5, 24.7)     |
| Some or completed college                                                       | 18.3 (13.3, 23.3)     |
| Some or completed University                                                    | 5 (2.4, 8)            |
| <b>Income sources for household</b>                                             |                       |
| Provincial or municipal social assistance or welfare (e.g. ODSP, Ontario Works) | 69.2 (63.1, 75)       |
| Wages and salaries                                                              | 28.2 (22.1, 34.2)     |
| Child Tax Benefit                                                               | 17 (12.4, 21.8)       |
| Any other income support                                                        | 13.3 (9.2, 17.6)      |
| Employment insurance                                                            | 9.6 (5.4, 14.3)       |



|                                                                               |                   |
|-------------------------------------------------------------------------------|-------------------|
| Income from self-employment                                                   | 7.7 (4.3, 11.7)   |
| Child Support                                                                 | 3 (1.1, 4.6)      |
| <b>Individual annual income</b>                                               |                   |
| \$0-4,999                                                                     | 18.3 (13.4, 24.8) |
| \$5,000-5,999                                                                 | 23.1 (17.1, 28.5) |
| \$10,000-14,999                                                               | 21.9 (16.3, 27.6) |
| \$15,000-19,999                                                               | 14.8 (10.7, 20)   |
| \$20,000+                                                                     | 21.8 (16, 27.6)   |
| <b>Mobility</b>                                                               |                   |
| No moves in past 5 years                                                      | 10.2 (6.2, 14.8)  |
| 1 move in past 5 years                                                        | 15.5 (10.5, 20.6) |
| 2 moves in past 5 years                                                       | 20.2 (15.4, 26.4) |
| 3-5 moves in past 5 years                                                     | 41.1 (35, 48.6)   |
| 6-10 moves in past 5 years                                                    | 10.4 (5.7, 13.4)  |
| <b>Overcrowding*</b>                                                          |                   |
| <=1 persons per room                                                          | 27.7 (21.6, 33.8) |
| 1-2 persons per room                                                          | 46 (40.5, 54.3)   |
| >2 persons per room                                                           | 26.3 (19.7, 30.8) |
| <b>Food security</b>                                                          |                   |
| You and others always had enough of the kinds of food you wanted to eat       | 26.7 (21.1, 32.8) |
| You and others had enough to eat, but not always the kinds of food you wanted | 51.5 (45.3, 58)   |
| Sometimes or often did not have enough to eat                                 | 21.8 (16.5, 27)   |

Note. CI = confidence interval.

\*Following Statistics Canada standards: calculated by dividing the number of rooms in each household (excluding the bathroom) by the number of people residing in the home

The data presented in Table 2 for age, gender and income quintiles compare the OHC population estimates with the total Hamilton population and a random subset of 10% of the Ontario provincial population. The three populations were very similar with respect to the gender breakdown, however, the OHC sample was younger than the general Hamilton and Ontario populations which is consistent with Census data.[38] Over 70% of the First Nations population fell into the lowest income quartile compared to 25% of the general Hamilton population and 20% of the Ontario population. At the higher end of the income scale, we observed that while 15% of Hamilton residents and 20% of the Ontario population fell into the highest income quartile, only 3% of the study population was earning in this category.

**Table 2. Gender, Age and Income Quintile for First Nations Adults, City of Hamilton and Ontario-10%**

| Variable | Sample                   |                      |                                  |                                       |
|----------|--------------------------|----------------------|----------------------------------|---------------------------------------|
|          | OHC<br>(Total<br>N=725*) | OHC-RDS-<br>Adjusted | Hamilton<br>(Total<br>N=536,253) | Ontario-10%<br>(Total<br>N=1,324,241) |
|          |                          |                      |                                  |                                       |



|                    | Prevalence,<br>% | Prevalence, %<br>(95% CI) | Prevalence,<br>% | Prevalence,<br>% |
|--------------------|------------------|---------------------------|------------------|------------------|
| Sex                |                  |                           |                  |                  |
| Female             | 49.4             | 37.6 (29.6, 43.6)         | 50.9             | 51.2             |
| Male               | 50.6             | 62.4 (56.4, 70.4)         | 49.1             | 48.7             |
| Age**              |                  |                           |                  |                  |
| 18-34              | 37.4             | 41.9 (34.4, 49.9)         | 28.2             | 28.2             |
| 35-49              | 37.6             | 36.6 (29.9, 43.1)         | 28.1             | 29.5             |
| 50-64              | 22.9             | 20.7 (14.7, 26.9)         | 24.8             | 24.8             |
| 65+                | 2.1              | 0.8 (0.3, 1.6)            | 18.9             | 17.6             |
| Income<br>Quintile |                  |                           |                  |                  |
| 1-Low              | 71.76            | 73 (66.5, 79.2)           | 25.1             | 19.5             |
| 2                  | 16.22            | 11.8 (7.7, 16)            | 22.8             | 19.8             |
| 3                  | 6.3              | 7.4 (3.6, 10.5)           | 20.3             | 19.8             |
| 4                  | 2.48             | 4.9 (2.5, 9.8)            | 17               | 20.4             |
| 5-High             | 1.34             | 3 (1.1, 5.4)              | 14.7             | 20.2             |

Note. CI = confidence interval; OHC = Our Health Counts; RDS = Respondent Driven Sampling.

\*Total N reflects number of participants linked to ICES database

\*\*Age of participants on 2010-04-01

The most common chronic conditions that had been diagnosed by a health care provider among First Nations adults (n=554) in Hamilton included arthritis (30.7%; 95% CI 25.4-36.8), hypertension (25.8%; 95% CI 20.3-31.6), asthma (19%; 95% CI 14.9-24.6), diabetes (15.6%; 95% CI 11.2-21.1), heart disease (8.4%; 95% CI 4.8-12.5) and COPD (8.4%; 95% CI 5.3-11.8). The prevalence of Hepatitis C was 8.7% (95% CI 4.3-11.7). 25% had been injured over the past 12 months. Upper respiratory tract infection (URTI) was common, with 73% (95% CI 67.9-79.9) of adults reporting URTI in the past 12 months.

Among First Nations adults (n=554), 16.7% (95% CI 11.4 – 22.1) felt that availability of health services in their community was excellent, 43.3% (95% CI 36.1 - 49.6) felt it was good, 28.9% (95% CI 23.3 – 35.2) felt it was fair and 11.1% (95% CI 7.9 – 15.6) felt availability was poor. Close to half (47.9%) of the First Nations living in Hamilton reported that long waiting lists were a barrier (95% CI 41.9 - 55.4). Other common barriers included: not being able to arrange transportation; doctor not available; not being able to afford direct costs and/or transportation; services not covered by Non-Insured Health Benefits and lack of trust in health care provider.

Both acute and non-acute emergency room visits were much more frequent among First Nations in Hamilton compared to the general Hamilton and Ontario populations. A striking 10.6% of the First Nations adult population in Hamilton reported 6 or more emergency room visits in the previous 2 years compared to 1.6% and 1.9% of the Hamilton and Ontario adult populations respectively (Table 3).

**Table 3. Number of Emergency Room visits in the Previous 2 Years for Adults (18-64 years), First Nations, City of Hamilton and Ontario-10%**

| Frequency of ER visits       | Sample             |                        |                            |                               |
|------------------------------|--------------------|------------------------|----------------------------|-------------------------------|
|                              | OHC (Total N=514*) | OHC RDS-Adjusted       | Hamilton (Total N=360,378) | Ontario-10% (Total N=901,509) |
|                              | Prevalence, %      | Prevalence, % (95% CI) | Prevalence, %              | Prevalence, %                 |
| None                         | 31.5               | (25.8 – 37.5)          | 66.3                       | 69.1                          |
| 1                            | 26.2               | (20.7 – 32.8)          | 18.7                       | 16.8                          |
| 2-5                          | 31.7               | (25.9 – 37.8)          | 13.4                       | 12.3                          |
| 6+                           | 10.6               | (6.2 – 14.5)           | 1.6                        | 1.9                           |
| <b>ER visits (acute)</b>     |                    |                        |                            |                               |
| None                         | 50.2               | (43.9 – 57.5)          | 78.4                       | 80.1                          |
| 1                            | 24.7               | (18.7 – 30.1)          | 14.2                       | 13.1                          |
| 2-5                          | 20.7               | (15.3 – 26.1)          | 6.8                        | 6.3                           |
| 6+                           | 4                  | 1.6 – 6.9)             | 0.6                        | 0.6                           |
| <b>ER visits (non-acute)</b> |                    |                        |                            |                               |
| None                         | 54.3               | (47.6 – 61.2)          | 79.4                       | 81.2                          |
| 1                            | 22.4               | (17.3 – 28.5)          | 14                         | 12.2                          |
| 2-5                          | 20.4               | (14.5 – 25.4)          | 6.3                        | 6                             |
| 6+                           | 2.9                | (1 – 5.6)              | 0.4                        | 0.6                           |

Note. CI= confidence interval; OHC = Our Health Counts; RDS = Respondent Driven Sampling

\*Total N reflects number of adults aged 28-64 linked to ICES database

Rates of hospitalization were slightly higher among the First Nations population compared to the Hamilton and Ontario populations. This can partly be explained by a higher birth rate among First Nations populations compared to the general Canadian population,[39] which is reflected by higher rates of obstetrics hospitalization compared to the general Hamilton and Ontario population: 7.3% (95% CI, 3.9 – 10.9) of the Hamilton First Nations population between the ages of 18 and 64 years had been hospitalized at least once in the past 5 years for obstetrical reasons compared to 4% of both the general Hamilton and Ontario populations in the same age group and over the same time period. However, given the high rates of chronic diseases such as diabetes and heart disease and the much higher rates of emergency room use among the First Nations population, these findings were unexpected and therefore require further investigation.

## DISCUSSION

The OHC project generated a representative, urban Aboriginal health database. Through the successful application of RDS, a sample of urban First Nations individuals who might otherwise not have participated in mainstream surveys or the census was captured. In addition, given the current deficiency in public health information on urban First Nations populations, the statistically rigorous RDS sample allowed us to produce population-

1  
2  
3 based estimates that can be utilized by local, regional, provincial and federal policy  
4 makers as well as urban Aboriginal stakeholders to address social inequities and health  
5 disparities facing this community.  
6  
7

8 Striking levels of poverty were identified in this study. The income data  
9 presented here may be a more representative income profile of the First Nations  
10 population in Hamilton than the 2006 Census. Specifically, the OHC data were adjusted  
11 for the sampling procedure using an RDS estimator and captured more 'hidden'  
12 populations such as persons who are homeless, transient or who have low literacy skills,  
13 who are known to be under-represented in the Census.[9,11] Further evidence of low  
14 incomes among this population is provided by the RDS-adjusted ICES income quintile  
15 data, which revealed that over 70% of the OHC cohort was in the lowest income quartile  
16 compared to 25% of the general Hamilton population and 20% of the Ontario population.  
17  
18  
19

20 Accompanying high levels of poverty, housing and food insecurity were also  
21 highly prevalent among First Nations persons living Hamilton. Over half of the study  
22 population had moved at least 3 times in the past 5 years compared to 60% of the general  
23 Hamilton population who had not moved at all for the past 5 years.[32] Compared to an  
24 overcrowding rate of 3% for the general Canadian population in the 2006 Census,[1] 74%  
25 of First Nations persons in Hamilton live in crowded conditions. These findings echo  
26 those presented in the 2007 Urban Aboriginal Task Force (UATF) final report, which  
27 documented persistent obstacles with finding affordable housing, obtaining stable and  
28 secure employment and accessing appropriate services and resources among urban  
29 Aboriginal people.[40] Similarly, the Toronto Aboriginal Research Project (TARP)  
30 found that Aboriginal people in Toronto tend to concentrate in lower-income  
31 neighbourhoods where a significant proportion, particularly men, live in poverty.[41]  
32 While a growing proportion of urban Aboriginal people in Canada are achieving varying  
33 degrees of economic success in a number of skilled professions,[5,41] there remains a  
34 significant amount of unmet basic needs among this population.  
35  
36  
37  
38

39 The burden of chronic conditions experienced by First Nations adults in Hamilton  
40 is disproportionately high. For example, 19% of the OHC Hamilton population reported  
41 having been told by a health care provider that they have asthma, which is more than  
42 twice the self-reported asthma rate (9.3%) for the overall Hamilton population in the  
43 2007 Canadian Community Health Survey (CCHS).[42] Likewise, rates of arthritis and  
44 high blood pressure were 30.7% and 25.8% among First Nations adults in Hamilton  
45 compared to 19.9% and 19.7% among all adults in Hamilton as reported in the 2007  
46 CCHS.[42] For First Nations adults in Hamilton, the rate of diabetes diagnosed by a  
47 health care provider was approximately three times the rate among the general Hamilton  
48 population.[42] These findings are particularly disconcerting given the much younger  
49 age demographic of the First Nations Hamilton population and the documented barriers  
50 to receiving health care services including long wait lists, challenges with accessing and  
51 affording transportation and the unavailability of physicians in the area. Furthermore,  
52 45.8% (95% CI 38.9-52.4) of First Nations adults believed that their ability to engage in  
53 preventative health activities (i.e. regular exercise, going to the doctor or nurse for health  
54 screening tests, accessing preventative dental care) had been affected by financial  
55 hardship.  
56  
57  
58  
59  
60

1  
2  
3  
4 High rates of emergency usage by First Nations persons living in Hamilton are  
5 likely linked to the problems in accessing non-emergency health care, as revealed by 40%  
6 of the population who rated their access to health care as fair or poor and 48% who  
7 indicated that wait lists are too long. In addition, as a result of primary healthcare  
8 reforms,[43] patients may be told by their primary care providers to go to the emergency  
9 department rather than a walk-in clinic when their primary care team is not available.[44]  
10 Further examination is required to explore potential bias in hospital admission practices  
11 and to differentiate between types of hospitalizations (i.e. mental health, surgical and  
12 medical hospitalizations).  
13

14  
15 There were a number of limitations of the study. Firstly, it should be noted that  
16 we may have under sampled the elderly First Nations population living in nursing  
17 homes or residences for senior citizens in Hamilton. During our initial seed selection,  
18 we did not select any seeds from this population, and this population may have fewer  
19 network ties than other population groups, which may have resulted in an under  
20 representation of First Nations individuals over 65 years of age. Secondly, RDS  
21 cannot guarantee a random sample of network members;[45] therefore, estimates are  
22 unbiased to the degree that the assumptions of the RDS estimator are met. There is an  
23 active literature on RDS and estimation using RDS data,[46,47] and there is debate  
24 regarding the true design effects of RDS surveys.[48,49] Existing multivariable  
25 regression analyses using RDS samples have not appropriately addressed the co-  
26 relation between observations and the unequal sampling probabilities inherent in RDS,  
27 therefore, we have focused on reporting prevalence estimates for which methods are  
28 better established. Despite these limitations, RDS was used to effectively recruit an  
29 urban Aboriginal population and allowed for the derivation of rigorous population  
30 estimates and data linkages that have previously not been possible.  
31  
32  
33  
34

35 Given the near absence of population health information for urban Aboriginal  
36 people in Canada, this research is able to provide, for the first time, First Nations data  
37 that clearly demonstrate alarming socio-economic inequities, a significant burden of  
38 chronic disease, multiple barriers in access to health care and elevated emergency room  
39 use. This newly established health database represents a significant contribution to  
40 public health that will directly inform strategic directions for the improvement of health  
41 and social status of urban Aboriginal people in Ontario. For example, this research will  
42 support the development of RDS as a tool to effectively recruit a larger cohort for  
43 longitudinal research with Aboriginal families in Ontario.  
44  
45  
46  
47  
48  
49  
50  
51  
52  
53  
54  
55  
56  
57  
58  
59  
60

## ACKNOWLEDGEMENTS

Firstly, we would like to thank the First Nations men and women who participated in the Our Health Counts project and so generously shared their time and stories over the course of several months. The Our Health Counts project would not have been possible without the tremendous commitment and enthusiasm of the research staff at De dwa da dehs ney>s Aboriginal Health Access Centre in Hamilton. This project was funded by the Ontario Federation of Indian Friendship Centres, the Ministry of Health and Long Term Care (MOHLTC) Aboriginal Health Transition Fund, and the Centre for Research on Inner City Health (CRICH) at St. Michael's Hospital. The Institute for Clinical Evaluative Sciences (ICES) contributed the costs of the in-house ICES data analysis. Dr. Smylie was supported by a Canadian Institutes for Health Research New Investigator in Knowledge Translation award during the course of the project.

## FUNDING

This study was supported by the Ministry of Health and Long Term Care

## CONTRIBUTORSHIP STATEMENT

M.F. contributed substantially to the study conception and design, co-led data interpretation and analysis and drafted multiple versions of the manuscript. J.S. co-led the study conception and design, data analysis and interpretation and made important contributions to the draft and final manuscript. S.M. contributed substantially to study conception and design, was a member of the governing council that guided each stage of research, represented the Aboriginal organizational lead of the research and made important revisions to the draft manuscript. DAHC was the Aboriginal community partner and supervised local data collection, participated in data analysis and interpretation. M.S. provided important technical support during data collection, co-led the data analysis and interpretation, and provided important revisions to the manuscript. P.O. contributed substantially to the study conception and design, analysis and interpretation of data and made important revisions to the draft manuscript.

**COMPETING INTERESTS**

None

**DATA SHARING STATEMENT**

A tri-party data sharing agreement was negotiated between the Institute of Clinical and Evaluative Sciences (ICES), the Our Health Counts Governing Council and the Centre for Research on Inner City Health at St Michael's Hospital in Toronto, Canada. Approval would need to be granted by these three parties for access to additional, unpublished data.

**REFERENCE LIST**

- 1 Statistics Canada. Aboriginal Peoples in Canada in 2006: Inuit, Métis and First Nations, 2006 Census. Ministry of Industry; 2008.
- 2 Canadian Institute for Health Research (CIHR). CIHR Guidelines for Health Research Involving Aboriginal People. Ottawa: CIHR; 20097.
- 3 National Aboriginal Health Organization (NAHO). Ways of Knowing: A Framework for Health Research. National Aboriginal Health Organization; 2003.
- 4 Policy Research Initiative. Not Strangers in these Parts. Urban Aboriginal Peoples. 2003.
- 5 Environics Institute. Urban Aboriginal Peoples Study Main Report. Environics Institute; 2010.
- 6 Garner R., Carrière G., Sanmartin C., Longitudinal Health and Administrative Data Research Team. The Health of First Nations Living Off -Reserve, Inuit, and Métis Adults in Canada: The Impact of Socio-economic Status on Inequalities in Health. Ottawa: Statistics Canada, Health Analysis Division; 2010. Report No.: 82-622-X.
- 7 Tait H. Aboriginal Peoples Survey, 2006: Inuit Health and Social Conditions. Ottawa, ON: Statistics Canada; 2008.



- 1  
2  
3 8 Smylie J. Aboriginal infant mortality rate in Canada. *Lancet* 2012;**380**(9851):1384.  
4  
5  
6  
7  
8 9 Anderson M., Smylie J. Performance measurement systems in Canada: How well  
9  
10 do they perform in First Nations, Inuit and Métis Contexts? *Pimatisiwin: A Journal*  
11  
12 of Aboriginal and Indigenous Community Health 2009;**7**(1):99-115.  
13  
14  
15  
16  
17 10 Smylie J., Fell D., Ohlsson A. A Review of Aboriginal Infant Mortality Rates in  
18  
19 Canada: Striking and Persistent Aboriginal and Non-Aboriginal Inequities.  
20  
21 *Canadian Journal of Public Health* 2010;**101**(2):143-8.  
22  
23  
24  
25  
26 11 Smylie J., Anderson M. Understanding the health of Indigenous peoples in Canada:  
27  
28 key methodologic and conceptual challenges. *Canadian Medical Association*  
29  
30 *Journal* 2006;**165**(6):602-5.  
31  
32  
33  
34  
35 12 Smylie J., Anderson I., Ratima M., Crengle S., Anderson M. Who is Measuring and  
36  
37 Why? Indigenous Health Performance Measurement Systems in Canada, Australia,  
38  
39 and New Zealand. *The Lancet* 2006;**367**:2029-31.  
40  
41  
42  
43  
44 13 Siggner A.J. The Challenge of Measuring the Demographic and Socio-Economic  
45  
46 Conditions of the Urban Aboriginal Population. In: Newhouse D., Peters E., editors.  
47  
48 *Strangers in these Parts: Urban Aboriginal Peoples*. Ottawa: Policy Research  
49  
50 Initiative; 2003. p. 119-30.  
51  
52  
53  
54  
55  
56  
57  
58  
59  
60

- 1  
2  
3  
4  
5  
6  
7  
8  
9  
10  
11  
12  
13  
14  
15  
16  
17  
18  
19  
20  
21  
22  
23  
24  
25  
26  
27  
28  
29  
30  
31  
32  
33  
34  
35  
36  
37  
38  
39  
40  
41  
42  
43  
44  
45  
46  
47  
48  
49  
50  
51  
52  
53  
54  
55  
56  
57  
58  
59  
60
- 14 Smylie J., Lofters A., Firestone M., O'Campo P. Population-Based Data and Community Empowerment. In: O'Campo P., Dunn J., editors. Rethinking Social Epidemiology: Towards a Science of Change. Springer Publishing Company; 2011.
  - 15 Graham K.A., Peters E.J. Aboriginal Communities and Urban Sustainability. Ottawa: Canadian Policy Research Networks; 2002.
  - 16 Anderson M., Smylie J., Anderson I., Sinclair R., Crengle S., Ratima M. First Nations, Métis, and Inuit Health Indicators in Canada. A background paper for the project "Action oriented indicators of health and health systems development for Indigenous peoples in Canada, Australia, and New Zealand. Saskatoon: Indigenous Peoples Health Research Centre; 2006.
  - 17 Collier R. Long-form census changes worries health researchers. Canadian Medical Association Journal 2010;**182**(12):E563-E564.
  - 18 Webster P.C. Aboriginal health programming under siege, critics charge. Canadian Medical Association Journal 2012;**184**(14):E739-E740.
  - 19 Heckathorn D. Respondent driven sampling: a new approach to the study of hidden populations. Social Problems 1997;**44**:174-99.

- 1  
2  
3 20 Heckathorn D. Respondent-driven sampling II: Deriving Valid Population  
4  
5 Estimates from Chain referral Samples of Hidden Populations. *Social Problems*  
6  
7 2002;**49**(1):11-34.  
8  
9  
10  
11  
12 21 Heckathorn D, Seeman S, Broadhead R, Hugues J. Extensions of Respondent  
13  
14 Driven Sampling: A new approach to the Study of Injection Drug Users aged 18-  
15  
16 25. *AIDS and Behavior* 2002;**6**(1):55-67.  
17  
18  
19  
20  
21 22 Evans-Campbell T., Lindhorts T., Huang B., Walters K.L. Interpersonal Violence in  
23  
24 the Lives of Urban American Indian and Alaska Native Women: Implications for  
25  
26 Health, Mental Health, and Help-Seeking. *American Journal of Public Health*  
27  
28 2006;**96**(8):1416-22.  
29  
30  
31  
32  
33 23 Abdul-Quader A., Heckathorn D, Saidel T. Implementation and Analysis of  
34  
35 Respondent Driven Sampling: Lessons from the Field. *Journal of Urban Health*  
36  
37 2006;**83**(7):1-5.  
38  
39  
40  
41  
42 24 Greenwood M. Children as citizens of First Nations: Linking Indigenous health to  
43  
44 early childhood development. *Pediatrics and Child Health* 2005;**10**(9):553-5.  
45  
46  
47  
48  
49 25 Ermine W. Aboriginal Epistemology. In: Battiste M, Barman J., editors. *First*  
50  
51 *Nations Education in Canada: The Circle Unfolds*. Vancouver: UBC Press; 1995. p.  
52  
53 101-12.  
54  
55  
56  
57  
58  
59  
60

- 1  
2  
3  
4  
5  
6  
7  
8  
9  
10  
11  
12  
13  
14  
15  
16  
17  
18  
19  
20  
21  
22  
23  
24  
25  
26  
27  
28  
29  
30  
31  
32  
33  
34  
35  
36  
37  
38  
39  
40  
41  
42  
43  
44  
45  
46  
47  
48  
49  
50  
51  
52  
53  
54  
55  
56  
57  
58  
59  
60
- 26 Smylie J., Kaplan-Myrth N., McShane K.E., Métis Nation of Ontario,  
Pikwakanagan First Nation, Tungasuvvingat Inuit Family Resource Centre.  
Indigenous Knowledge Translation: Baseline Findings in a Qualitative Study of the  
Pathways of Health Knowledge in Three Indigenous Communities in Canada.  
Health Promotion Practice 2009;**10**(3):436-46.
- 27 Canadian Institute of Health Research, Natural Sciences and Engineering Research  
Council of Canada, Social Sciences and Humanities Research Council of Canada.  
Tri-Council Policy Statement: Ethical Conduct for Research Involving Humans.  
2010.
- 28 Canadian Institute for Health Research (CIHR). CIHR Guidelines for Health  
Research Involving Aboriginal People. Ottawa: CIHR; 2007.
- 29 Ball J., Janyst P. Enacting Research Ethics Partnerships with Indigenous  
Communities and Canada: "Do it in a Good Way.". Journal of Empirical Research  
on Human Research Ethics 2008;**3**(2):33-51.
- 30 First Nations Centre. First Nations Conceptual Frameworks and Applied Models on  
Ethics, Privacy, and Consent in Health Research and Information. Ottawa: National  
Aboriginal Health Organization (NAHO); 2006.
- 31 Ontario Federation of Indian Friendship Centres (OFIFC). USAI Utility Self-  
Voicing Access Inter-relationality Reserach Framework. 2012.

- 1  
2  
3 32 Statistics Canada. Hamilton, Ontario (Code3525005) (table). 2006 Community  
4  
5 Profiles. 2006 Census. Statistics Canada; 2007. Report No.: Catalogue no. 92-591-  
6  
7 XWE.  
8  
9  
10  
11  
12 33 Salganik M.J. Variance estimation, design effects, and sample size calculations for  
13  
14 respondent-driven sampling. *Journal of Urban Health* 2006;**83**(6 (Suppl)):98-112.  
15  
16  
17  
18  
19 34 Firestone M. Our Health Counts: Unmasking Health and Social Disparities among  
20  
21 Urban Aboriginal People in Ontario University of Toronto; 2013.  
22  
23  
24  
25  
26 35 IBM® SPSS® Data Collection Author [computer program]. Version 6.0.1.  
27  
28 Chicago, IL: SPSS Inc.; 2000.  
29  
30  
31  
32  
33 36 Respondent-Driven Sampling Analysis Tool (RDSAT) Version 7.1 [computer  
34  
35 program]. Ithica, New York: Cornell University; 2007.  
36  
37  
38  
39  
40 37 Wejnert C. An Empirical Test of Respondent-Driven Sampling: Point Estimates,  
41  
42 Variance, Degree Measures, and Out-of-Equilibrium Data. *Sociological*  
43  
44 *Methodology* 2009;**39**(1):73-116.  
45  
46  
47  
48  
49 38 Statistics Canada no.92-594-XWE. Hamilton, Ontario (Code 3525005) (table).  
50  
51 Aboriginal Population Profile. 2006 Census. [http://www12  
54  
55 statcan.ca/census-  
56  
57 recensement/2006/dp-pd/prof/92-594/index.cfm?Lang=E](http://www12.statcan.ca/census-<br/>52<br/>53 recensement/2006/dp-pd/prof/92-594/index.cfm?Lang=E) (accessed January 20,  
58  
59 2014) 2007 [cited 11 A.D. Apr 30];  
60

- 1  
2  
3  
4  
5  
6  
7  
8  
9  
10  
11  
12  
13  
14  
15  
16  
17  
18  
19  
20  
21  
22  
23  
24  
25  
26  
27  
28  
29  
30  
31  
32  
33  
34  
35  
36  
37  
38  
39  
40  
41  
42  
43  
44  
45  
46  
47  
48  
49  
50  
51  
52  
53  
54  
55  
56  
57  
58  
59  
60
- 39 Health Canada. A Statistical Profile on the Health of First Nations in Canada, for the Year 2000. Ottawa; 2005. Report No.: H35-4/30-2000E-PDF.
- 40 Ontario Federation of Indian Friendship Centres (OFIFC), Ontario Métis Aboriginal Association, Ontario Native Women's Association (ONWA). Urban Aboriginal Task Force Final Report. 2007.
- 41 McCaskill D., FitzMaurice K., Cidro J. Toronto Aboriginal Research Project (TARP) Final Report. 2011.
- 42 Statistics Canada. Canadian Community Health Survey. Ottawa: Statistics Canada; 2007.
- 43 Muldoon L., Rowan M.S., Geneau R., Hogg W., Coulson D. Models of primary care Service delivery in Ontario: Why such diversity? Healthcare Management Forum 2006;**19**(4):18-23.
- 44 Howard M., Goertzen J., Kaczorowski J., Hutchinson B., Morris K., Thabane L., et al. Emergency Department and Walk-in Clinic Use in Models of Primary Care Practice with Different After Hours Accessibility in Ontario. Health Care Policy 2008;**4**(1):73-88.

- 1  
2  
3 45 Heimer R. Critical Issues and Further Questions About Respondent-Driven  
4  
5 Sampling: Comment on Ramirez-Valles, *et al.* (2005). *AIDS and Behavior*  
6  
7 2005;**9**(4):403-8.  
8  
9  
10  
11  
12 46 Gile K.J., Handcock M.S. Respondent-Driven Sampling: An Assessment of Current  
13  
14 Methodology. *Sociological Methodology* 2010;**40**(1):285-327.  
15  
16  
17  
18  
19 47 Heckathorn D. Extensions of respondent-driven sampling: analyzing continuous  
20  
21 variables and controlling for differential recruitment. *Sociological Methodology*  
22  
23 2007;**37**(1):151-208.  
24  
25  
26  
27  
28 48 Goel S., Salganik M.J. Assessing respondent-driven sampling. *Proceedings of the*  
29  
30 *National Academy of Sciences of the United States of America* 2010;**107**(15):6743-  
31  
32 7.  
33  
34  
35  
36  
37  
38 49 Wejnert C., Pham H., Krishna N., Le B., DiNenno E. Estimating design effect and  
39  
40 calculating sample size for respondent-driven sampling studies of injection drug  
41  
42 users in the United States. *AIDS Behavior* 2012;**16**(4):797-806.  
43  
44  
45  
46  
47  
48  
49  
50  
51  
52  
53  
54  
55  
56  
57  
58  
59  
60



**STROBE 2007 (v4) checklist of items to be included in reports of observational studies in epidemiology\***  
**Checklist for cohort, case-control, and cross-sectional studies (combined)**

| Section/Topic             | Item # | Recommendation                                                                                                                                                                                                                                                                                                                                                                                                                                                         | Reported on page # |
|---------------------------|--------|------------------------------------------------------------------------------------------------------------------------------------------------------------------------------------------------------------------------------------------------------------------------------------------------------------------------------------------------------------------------------------------------------------------------------------------------------------------------|--------------------|
| Title and abstract        | 1      | (a) Indicate the study's design with a commonly used term in the title or the abstract                                                                                                                                                                                                                                                                                                                                                                                 | Yes, in title      |
|                           |        | (b) Provide in the abstract an informative and balanced summary of what was done and what was found                                                                                                                                                                                                                                                                                                                                                                    | Yes, pg 2          |
| <b>Introduction</b>       |        |                                                                                                                                                                                                                                                                                                                                                                                                                                                                        |                    |
| Background/rationale      | 2      | Explain the scientific background and rationale for the investigation being reported                                                                                                                                                                                                                                                                                                                                                                                   | Yes, pg 3-4        |
| Objectives                | 3      | State specific objectives, including any pre-specified hypotheses                                                                                                                                                                                                                                                                                                                                                                                                      | Yes, pg 4          |
| <b>Methods</b>            |        |                                                                                                                                                                                                                                                                                                                                                                                                                                                                        |                    |
| Study design              | 4      | Present key elements of study design early in the paper                                                                                                                                                                                                                                                                                                                                                                                                                | Yes, pg 4-5        |
| Setting                   | 5      | Describe the setting, locations, and relevant dates, including periods of recruitment, exposure, follow-up, and data collection                                                                                                                                                                                                                                                                                                                                        | Yes, pg 5          |
| Participants              | 6      | (a) <i>Cohort study</i> —Give the eligibility criteria, and the sources and methods of selection of participants. Describe methods of follow-up<br><i>Case-control study</i> —Give the eligibility criteria, and the sources and methods of case ascertainment and control selection. Give the rationale for the choice of cases and controls<br><i>Cross-sectional study</i> —Give the eligibility criteria, and the sources and methods of selection of participants | Yes, pg 5          |
|                           |        | (b) <i>Cohort study</i> —For matched studies, give matching criteria and number of exposed and unexposed<br><i>Case-control study</i> —For matched studies, give matching criteria and the number of controls per case                                                                                                                                                                                                                                                 |                    |
| Variables                 | 7      | Clearly define all outcomes, exposures, predictors, potential confounders, and effect modifiers. Give diagnostic criteria, if applicable                                                                                                                                                                                                                                                                                                                               |                    |
| Data sources/ measurement | 8*     | For each variable of interest, give sources of data and details of methods of assessment (measurement). Describe comparability of assessment methods if there is more than one group                                                                                                                                                                                                                                                                                   | Yes, pg 5-6        |
| Bias                      | 9      | Describe any efforts to address potential sources of bias                                                                                                                                                                                                                                                                                                                                                                                                              | Yes, pg 4          |
| Study size                | 10     | Explain how the study size was arrived at                                                                                                                                                                                                                                                                                                                                                                                                                              | Yes, pg 5          |
| Quantitative variables    | 11     | Explain how quantitative variables were handled in the analyses. If applicable, describe which groupings were chosen and why                                                                                                                                                                                                                                                                                                                                           | Yes, pg 6          |
| Statistical methods       | 12     | (a) Describe all statistical methods, including those used to control for confounding                                                                                                                                                                                                                                                                                                                                                                                  | Yes pg 6           |
|                           |        | (b) Describe any methods used to examine subgroups and interactions                                                                                                                                                                                                                                                                                                                                                                                                    |                    |
|                           |        | (c) Explain how missing data were addressed                                                                                                                                                                                                                                                                                                                                                                                                                            |                    |
|                           |        | (d) <i>Cohort study</i> —If applicable, explain how loss to follow-up was addressed<br><i>Case-control study</i> —If applicable, explain how matching of cases and controls was addressed                                                                                                                                                                                                                                                                              |                    |

|                          |     |                                                                                                                                                                                                                                                                                                                                                                                                               |               |
|--------------------------|-----|---------------------------------------------------------------------------------------------------------------------------------------------------------------------------------------------------------------------------------------------------------------------------------------------------------------------------------------------------------------------------------------------------------------|---------------|
|                          |     | <i>Cross-sectional study</i> —If applicable, describe analytical methods taking account of sampling strategy                                                                                                                                                                                                                                                                                                  |               |
|                          |     | (e) Describe any sensitivity analyses                                                                                                                                                                                                                                                                                                                                                                         |               |
| <b>Results</b>           |     |                                                                                                                                                                                                                                                                                                                                                                                                               |               |
| Participants             | 13* | (a) Report numbers of individuals at each stage of study—eg numbers potentially eligible, examined for eligibility, confirmed eligible, included in the study, completing follow-up, and analysed<br>(b) Give reasons for non-participation at each stage<br>(c) Consider use of a flow diagram                                                                                                               |               |
| Descriptive data         | 14* | (a) Give characteristics of study participants (eg demographic, clinical, social) and information on exposures and potential confounders<br>(b) Indicate number of participants with missing data for each variable of interest<br>(c) <i>Cohort study</i> —Summarise follow-up time (eg, average and total amount)                                                                                           | Yes, pg 6-7   |
| Outcome data             | 15* | <i>Cohort study</i> —Report numbers of outcome events or summary measures over time<br><i>Case-control study</i> —Report numbers in each exposure category, or summary measures of exposure<br><i>Cross-sectional study</i> —Report numbers of outcome events or summary measures                                                                                                                             |               |
| Main results             | 16  | (a) Give unadjusted estimates and, if applicable, confounder-adjusted estimates and their precision (eg, 95% confidence interval). Make clear which confounders were adjusted for and why they were included<br>(b) Report category boundaries when continuous variables were categorized<br>(c) If relevant, consider translating estimates of relative risk into absolute risk for a meaningful time period |               |
| Other analyses           | 17  | Report other analyses done—eg analyses of subgroups and interactions, and sensitivity analyses                                                                                                                                                                                                                                                                                                                |               |
| <b>Discussion</b>        |     |                                                                                                                                                                                                                                                                                                                                                                                                               |               |
| Key results              | 18  | Summarise key results with reference to study objectives                                                                                                                                                                                                                                                                                                                                                      | Yes, Pg 9-11  |
| Limitations              | 19  | Discuss limitations of the study, taking into account sources of potential bias or imprecision. Discuss both direction and magnitude of any potential bias                                                                                                                                                                                                                                                    | Yes, Pg 11    |
| Interpretation           | 20  | Give a cautious overall interpretation of results considering objectives, limitations, multiplicity of analyses, results from similar studies, and other relevant evidence                                                                                                                                                                                                                                    | Yes, pg 9-11  |
| Generalisability         | 21  | Discuss the generalisability (external validity) of the study results                                                                                                                                                                                                                                                                                                                                         |               |
| <b>Other information</b> |     |                                                                                                                                                                                                                                                                                                                                                                                                               |               |
| Funding                  | 22  | Give the source of funding and the role of the funders for the present study and, if applicable, for the original study on which the present article is based                                                                                                                                                                                                                                                 | Yes, pg 11-12 |

\*Give information separately for cases and controls in case-control studies and, if applicable, for exposed and unexposed groups in cohort and cross-sectional studies.

**Note:** An Explanation and Elaboration article discusses each checklist item and gives methodological background and published examples of transparent reporting. The STROBE checklist is best used in conjunction with this article (freely available on the Web sites of PLoS Medicine at <http://www.plosmedicine.org/>, Annals of Internal Medicine at <http://www.annals.org/>, and Epidemiology at <http://www.epidem.com/>). Information on the STROBE Initiative is available at [www.strobe-statement.org](http://www.strobe-statement.org).

# BMJ Open

## Unmasking Health Determinants and Health Outcomes for Urban First Nations Using Respondent Driven Sampling

|                                 |                                                                                                                                                                                                                                                                                                                                                                                                                                                                                       |
|---------------------------------|---------------------------------------------------------------------------------------------------------------------------------------------------------------------------------------------------------------------------------------------------------------------------------------------------------------------------------------------------------------------------------------------------------------------------------------------------------------------------------------|
| Journal:                        | <i>BMJ Open</i>                                                                                                                                                                                                                                                                                                                                                                                                                                                                       |
| Manuscript ID:                  | bmjopen-2014-004978.R1                                                                                                                                                                                                                                                                                                                                                                                                                                                                |
| Article Type:                   | Research                                                                                                                                                                                                                                                                                                                                                                                                                                                                              |
| Date Submitted by the Author:   | 29-Apr-2014                                                                                                                                                                                                                                                                                                                                                                                                                                                                           |
| Complete List of Authors:       | Firestone, Michelle; St. Michaels Hospital, Centre for Research on Inner City Health<br>Smylie, Janet; University of Toronto, Dalla Lana School of Public Health<br>Maracle, Sylvia; Ontario Federation of Indian Friendship Centres,<br>Spiller, Michael; Cornell University,<br>De dwa da dehs ney>s, Aboriginal Health Access Centre; De dwa da dehs ney>s Aboriginal Health Access Centre,<br>O'Campo, Patricia; St. Michael's Hospital, Centre for Research on Inner City Health |
| <b>Primary Subject Heading</b>: | Public health                                                                                                                                                                                                                                                                                                                                                                                                                                                                         |
| Secondary Subject Heading:      | Public health, Research methods, Epidemiology                                                                                                                                                                                                                                                                                                                                                                                                                                         |
| Keywords:                       | PUBLIC HEALTH, EPIDEMIOLOGY, SOCIAL MEDICINE                                                                                                                                                                                                                                                                                                                                                                                                                                          |
|                                 |                                                                                                                                                                                                                                                                                                                                                                                                                                                                                       |

SCHOLARONE™  
Manuscripts

1  
2  
3  
4 Unmasking Health Determinants and Health Outcomes for Urban First Nations Using  
5 Respondent Driven Sampling  
6

7  
8 Firestone M., Smylie J., Maracle S., Spiller M., De dwa da dehs ney>s Aboriginal Health  
9 Access Centre, O'Campo P.  
10

11 **Corresponding Author:**

12 Firestone, Michelle  
13 Post-Doctoral Fellow, Centre for Research on Inner City Health (CRICH), St. Michael's  
14 Hospital  
15 209 Victoria, 3rd floor  
16 Toronto, Ontario Canada M5B 1C6  
17 Email: firestonem@smh.ca  
18 Phone: 416-864-6060 ext 77437  
19 Fax: 416-864-5558  
20  
21  
22

23 Smylie, Janet  
24 Research Scientist, Centre for Research on Inner City Health (CRICH)  
25 Associate Professor, Department of Public Health Sciences, University of Toronto  
26 Toronto, Canada  
27

28  
29 Maracle, Sylvia  
30 Executive Director, Ontario Federation of Indian Friendship Centres (OFIFC)  
31 Toronto, Canada  
32

33  
34 De dwa da dehs ney>s Aboriginal Health Access Centre (DAHC)  
35 Hamilton, Canada  
36

37 O'Campo, Patricia  
38 Director, Centre for Research on Inner City Health  
39 Professor, Dalla Lana School of Public Health, University of Toronto  
40 Toronto, Canada  
41

42  
43 **Keywords:** Canada; urban Aboriginal health; First Nations; Respondent-Driven  
44 Sampling; Community-based Research  
45

46 **Word Count:** 3,739  
47  
48  
49  
50  
51  
52  
53  
54  
55  
56  
57  
58  
59  
60

## ABSTRACT

**Objective:** Population based health information on urban Aboriginal populations in Canada is limited due to challenges with the identification of Aboriginal persons in existing health datasets. The main objective of the Our Health Counts (OHC) project was to work in partnership with Aboriginal stakeholders to generate a culturally relevant, representative baseline health data set for three urban Aboriginal communities in Ontario, Canada. **Design:** Respondent-Driven Sampling.

**Setting:** Hamilton, Ontario, Canada.

**Participants:** The OHC study, in partnership with De dwa da dehs ney>s Aboriginal Health Access Centre (DAHC) recruited 554 First Nations adults living in Hamilton using RDS.

**Results:** Among First Nations adults living in Hamilton, 78% earned less than \$20,000 per year and 70% lived in the lowest income quartile neighbourhoods. Mobility and crowded living conditions were also highly prevalent. Common chronic diseases included arthritis, hypertension, diabetes and COPD and rates of emergency room access were elevated.

**Conclusions:** RDS is an effective sampling method in urban Aboriginal contexts as it builds upon existing social networks and successfully identified a population-based cohort. The findings illustrate striking disparities in health determinants and health outcomes between urban First Nations individuals and the general population.

## ARTICLE SUMMARY

### Strengths and limitations of this study:

- Our study is the first RDS of self-identified First Nations people residing in an urban setting in Canada
- This study models best practices in academic-Aboriginal community research partnerships
- RDS has been demonstrated to be a promising tool for generating Aboriginal health assessment measures in urban areas where there are limited existing sampling frame options
- At present, multivariable regression analyses using RDS samples have not appropriately addressed the co-relation between observations and the unequal sampling probabilities inherent in RDS; therefore we present prevalence estimates for which methods are better established

## INTRODUCTION

According to the 2006 Census, over 60% (150,570 people) of Aboriginal<sup>a</sup> people living in Ontario live in urban areas.(1) Nearly seven out of ten Métis live in urban areas, and about three out of every four people in the off-reserve First Nations population live in urban areas.(1) First Nations people have historically been dislocated from their original homelands and may constitute diasporic, heterogeneous communities in urban areas.(2) Specifically, an increasing number of First Nations individuals are moving to urban centres to seek better housing, employment and education opportunities and for the services and amenities available.(3-5) There is a growing body of literature exploring the complexities of urban Indigeneity (6) and some of the elements which distinguish urban Aboriginal identity are social and economic marginalization, a growing middle class, and population diversity in term so cultural origins and legal status.(7) According to the Canadian Census, First Nations, Inuit, and Métis populations experience ongoing disparities in social determinants of health such as income insecurity, unemployment, low levels of education, decreased food availability, and inadequate housing compared to non-Aboriginal Canadians, and these disparities are exacerbated with urban residence.(1;8;9)

Despite the growing size of the urban Aboriginal population in Canada, accessible and culturally relevant population health data for this population are almost non-existent.(10-13) While census data do exist, there are serious deficits in population health measures.(13) Some of the reasons behind this deficiency are limitations in the current health information system and data collection processes with respect to Aboriginal peoples.(14;15) Sampling frames are often biased and comprise non-random subpopulations such as lists of members or clients of particular programs and services in the community. When urban Aboriginal people have been included in census-based national surveys, these surveys were underpowered and often First Nations, Inuit, and Métis data could not be successfully disaggregated.(14;16) Additionally, studies based on Census data show that a significant number of Aboriginal people move from rural and reserve areas to cities, and back and forth as well as within and among cities.(4;17) These factors make it difficult to get reliable counts of the Aboriginal population of a city.

At the national level, the continued inability to identify Aboriginal peoples in healthcare databases leads to very poor coverage of Aboriginal populations in Canada,

---

<sup>a</sup> “Aboriginal people” is a collective name for all of the original peoples of Canada and their descendants. The *Constitution Act* of 1982 specifies that the Aboriginal Peoples in Canada consist of three groups: Indians, Inuit and Métis. The term First Nations came into common use in the 1970s to replace Indian, which some people found offensive. Despite its widespread use, there is no legal definition for this term in Canada. In the United States, the term “Native American” is used to represent Indigenous peoples from North America, including Mexico. For alignment with the US Constitution and to ensure policy implications, the term “American Indian” is still used for Indigenous populations living within US borders, particularly the lower 48 states and parts of Alaska. “Indigenous” is a term used in the international context.

1  
2  
3 with a specific paucity of health information for First Nations, Métis, and Inuit living in  
4 urban areas. Provincial and territorial systems generally do not collect ethnic-specific  
5 utilization data, and their ethnic flags for vital statistics are inconsistent or absent.(18)  
6 The federal government's decision to cancel the long form of the Canadian national  
7 census will further challenge the ability of researchers and communities to identify and  
8 address social inequities across and within populations who experience racialization and  
9 the negative effects of structural discrimination in healthcare and other sectors , thus  
10 widening the existing health and social policy vacuum.(19;20)  
11  
12  
13

14 In the absence of an accessible and accurate population based sampling frame for  
15 urban Aboriginal people, we implemented respondent driven sampling (RDS) for the Our  
16 Health Counts (OHC) study. RDS, like other chain-referral approaches, relies on  
17 members of a population to recruit their peers.(21;22) However, RDS differs from other  
18 methods because of estimation procedures that adjust for the participants' different  
19 probabilities of being sampled.(22) RDS also differs from other chain-referral methods  
20 because the number of recruitments any participant can make is limited, and it employs a  
21 dual incentive structure where participants are rewarded both for participating and for  
22 recruiting their peers.(23)  
23  
24  
25

26 There is limited literature on RDS in Indigenous contexts;(24) however, there is  
27 evidence that links the success of RDS to the strength of social networks and  
28 relationships.(25) Indigenous knowledges are wholistic, relational and embraces a  
29 fluidity that allows for constant growth and change.(26;27) Aboriginal identities values  
30 the group over the individual, thereby establishing models of kinship whereby everyone  
31 has the right to give and receive according their own choices.(26) Therefore, we  
32 hypothesized that RDS would be an appropriate and effective sampling methodology as it  
33 builds on social networks and would draw on existing kinship systems known to be  
34 present in Indigenous communities.(28)  
35  
36  
37

38 The main objective of the OHC project was to work in partnership with  
39 Aboriginal stakeholders to generate a culturally relevant, representative baseline health  
40 data set for three urban Aboriginal communities in Ontario, Canada. The results  
41 presented here pertain specifically to the urban First Nations population in Hamilton  
42 where the organizational project lead was the Ontario Federation of Indian Friendship  
43 Centres (OFIFC) and the community partner was De dwa da dehs ney>s Aboriginal  
44 Health Access Centre (DAHC).  
45  
46

## 47 **METHODS**

### 49 **Community-based participatory research**

50 This study upheld current ethical and scientific standards in Indigenous health  
51 research(29-33) through a community based participatory research partnership between  
52 the academic research team, OFIFC and DAHC. We ensured that our Aboriginal  
53 decision making partners were active in all aspects of the research through the following  
54 mechanisms: Aboriginal leadership; research agreements which explicitly addressed  
55 issues of project governance, community expectations, benefits, ownership, control,  
56 access, and possession of information, and dissemination of project results; capacity  
57  
58  
59  
60



1  
2  
3 building through staffing at community sites, data workshops and awareness building;  
4 respect for the individual and collective rights of Aboriginal peoples with respect to their  
5 health information; cultural relevance through the development and application of  
6 culturally appropriate measures; representation of the urban Aboriginal population of  
7 Ontario; and sustainability of the project to ensure that this database can be  
8 geographically and longitudinally expanded. DAHC In addition, a Governing Council,  
9 comprised of representatives from the core urban Aboriginal provincial organizations was  
10 established to oversee all stages of the research process. Specifically, this body adhered  
11 to governance protocols and ensured that individual and collective community rights  
12 were respected, were kept informed about the project's progress and led the project  
13 towards meaningful results, acted as a resource to the community on questions related to  
14 various portions of the research project and controlled the release of all data generated by  
15 the study.  
16  
17  
18  
19

20 All members of the study team were from the Aboriginal community, living in the  
21 general vicinity of the city of Hamilton. Formal ethics approval was provided by the  
22 Research Ethics Board of St. Michael's Hospital in Toronto.  
23

### 24 **Study Site**

25  
26 The City of Hamilton is located in southern Ontario on what was traditionally  
27 Haudenosaunee (Iroquian) territory and is near two First Nations reserves: Six Nations of  
28 the Grand River and Mississaugas of the New Credit. According to the 2006 Census, the  
29 total Aboriginal population in Hamilton was 13,735 people, comprising 2.8% of the total  
30 population of the city.<sup>(34)</sup> The OFIFC identified the city of Hamilton as a promising  
31 community site based on its significant Aboriginal population and strong infrastructure of  
32 Aboriginal community services.  
33  
34

### 35 **Recruitment**

36  
37 The RDS process was initiated through the purposive selection of individuals to begin  
38 recruitment, also called "seeds." Inclusion criteria for participation in the study included  
39 18 years of age, residence within the geographic boundaries of the City of Hamilton and  
40 self-identified as having First Nations identity. First Nations identity was determined  
41 through open dialogue around family, experiences, and location while also explaining the  
42 overall study goals and additional study sites in Ottawa. Questions such as: "What words  
43 best describe you?" and "How do you see yourself?" were useful. With the help of  
44 community partners, six seeds were identified and agreed to participate. In order for  
45 seeds to reflect a diverse demographic of First Nations people living in Hamilton, factors  
46 such as gender, age, family size, and occupations were considered in their selection. For  
47 example, seeds were identified in the student population, among the steel workers union,  
48 among artists, elders, housing and social assistance providers as well as members of local  
49 Aboriginal organizations and boards. Five of the six seeds produced referrals within the  
50 two weeks leading up to the December 2009 holiday closure at DAHC. In February and  
51 March 2010, three additional seeds were added.  
52  
53  
54  
55

56  
57 Study participants, including seeds, provided informed consent and then  
58  
59  
60

1  
2  
3 completed a health assessment survey after which they received 3-5 coded coupons to  
4 refer a member of their social network into the study. Following the holiday closure of  
5 DAHC, the number of distributed coupons per recruit was increased from 3 to 5 in order  
6 to increase the rate of recruitment. Participants received a monetary reimbursement of  
7 \$20 for their time and participation. They also received an additional \$10 for every  
8 eligible person they recruited into the study. Study recruitment and interviews took place  
9 in an Aboriginal community centre.  
10  
11

12 For sample size calculation, we assumed 95% confidence intervals (CI), survey  
13 item prevalence ranges from 10% to 75% and a design effect of 2.(35) Based on this  
14 formula, the OCH study aimed to recruit 500 First Nations adults and 250 children.  
15  
16

### 17 Sources of Data

18  
19 Community concept mapping was implemented to develop a community specific survey  
20 for First Nations in Hamilton, (36) which was comprised of 8 domains covering areas  
21 such as sociodemographics, physical, mental, and emotional health, First Nations identity  
22 and impacts of colonization (i.e. questions about Residential School attendance,  
23 involvement of child protection agencies, dislocation from traditional lands and  
24 discrimination), and access and barriers to care. The survey tool was piloted with First  
25 Nations community members, and minor modifications were made to improve face  
26 validity. Data were collected and compiled by computer-assisted personal interviewing  
27 with a computer based version of the survey tool developed by the research team using  
28 SPSS Data Collection Author and Collector.(37)  
29  
30  
31

32 Upon completion of recruitment and survey, our sample of First Nations adults  
33 was linked to data holdings at the Institute of Clinical Evaluative Sciences (ICES)  
34 including provincial records of emergency room and hospital visits (Canadian Institutes  
35 of Health Information – Discharge Abstract Database and National Ambulatory Care  
36 Reporting System: Emergency), and neighbourhood income quintiles (derived from  
37 Census data). Using health care system identification numbers (i.e. Ontario Health Card)  
38 provided by participants, we successfully linked 92% (N=725) of First Nations adults to  
39 the ICES database.  
40  
41  
42

### 43 Analysis

44 Recruitment dynamics, adjusted population based estimates and confidence intervals  
45 were calculated using the RDS-I enhanced data smoothing estimator in the custom  
46 RDSAT software (version 7.1).(38) The RDS methodology anticipates that personal  
47 networks are not randomly distributed, and therefore adjusts for small to moderate levels  
48 of network clustering (people who have ties to others like them), in the form of post-  
49 sampling weights.  
50  
51  
52

## 53 RESULTS

54  
55 Among First Nations adults in Hamilton, 78.9% of participants were recruited via referral  
56 trees originating from two seeds. With 19 and 32 waves respectively, the lengths of both  
57 of these recruitment chains were long enough to overcome the original sampling bias,  
58  
59  
60

which usually happens after 6 or 7 waves of recruitment.(39) The statistical theory is that if the chain-referral process consists of enough waves or cycles of recruitment, the composition of the final sample with respect to key characteristics and behaviors will become independent of the seeds from which it began. The point at which the sample composition becomes stable is termed “equilibrium” and is an indication that RDS has been implemented successfully.(21)

Over a period of four and a half months (November 2009 to March 2010) a total of 790 persons were recruited, including 554 adults and 236 children Overall, a high response rate for survey questions was observed. Specifically, non-response rates ranged from 2.5% to less than 0.5%. Even more sensitive questions around income, food security, and impacts of colonization had very low non-response rates under 2%. Such high response rates can be attributed to the survey tool itself, which reflected the health priorities of the community(40) and which was administered in a safe and culturally secure context. Demographic and social characteristics are presented in Table 1.

**Table 1. Demographic and social characteristics of First Nations adults (Total N=554)**

| Characteristic                                                                  | Prevalence % (95% CI) |
|---------------------------------------------------------------------------------|-----------------------|
| <b>Sex</b>                                                                      |                       |
| Male                                                                            | 59.9 (53.3, 67.2)     |
| <b>Age</b>                                                                      |                       |
| 18-34                                                                           | 40.2 (33.3, 48)       |
| 35-49                                                                           | 35.4 (28.7, 41.6)     |
| 50+                                                                             | 24.4 (18.4, 30.8)     |
| <b>Education</b>                                                                |                       |
| Some high school or less                                                        | 57.3 (51.1, 64)       |
| Completed high school                                                           | 19.5 (14.5, 24.7)     |
| Some or completed college                                                       | 18.3 (13.3, 23.3)     |
| Some or completed University                                                    | 5 (2.4, 8)            |
| <b>Income sources for household</b>                                             |                       |
| Provincial or municipal social assistance or welfare (e.g. ODSP, Ontario Works) | 69.2 (63.1, 75)       |
| Wages and salaries                                                              | 28.2 (22.1, 34.2)     |
| Child Tax Benefit                                                               | 17 (12.4, 21.8)       |
| Any other income support                                                        | 13.3 (9.2, 17.6)      |
| Employment insurance                                                            | 9.6 (5.4, 14.3)       |
| Income from self-employment                                                     | 7.7 (4.3, 11.7)       |
| Child Support payments                                                          | 3 (1.1, 4.6)          |
| <b>Individual annual income</b>                                                 |                       |
| \$0-4,999                                                                       | 18.3 (13.4, 24.8)     |
| \$5,000-5,999                                                                   | 23.1 (17.1, 28.5)     |
| \$10,000-14,999                                                                 | 21.9 (16.3, 27.6)     |
| \$15,000-19,999                                                                 | 14.8 (10.7, 20)       |
| \$20,000+                                                                       | 21.8 (16, 27.6)       |

|                                                                               |                   |
|-------------------------------------------------------------------------------|-------------------|
| <b>Mobility</b>                                                               |                   |
| No moves in past 5 years                                                      | 10.2 (6.2, 14.8)  |
| 1 move in past 5 years                                                        | 15.5 (10.5, 20.6) |
| 2 moves in past 5 years                                                       | 20.2 (15.4, 26.4) |
| 3-5 moves in past 5 years                                                     | 41.1 (35, 48.6)   |
| 6-10 moves in past 5 years                                                    | 10.4 (5.7, 13.4)  |
| <b>Overcrowding*</b>                                                          |                   |
| <=1 persons per room                                                          | 27.7 (21.6, 33.8) |
| 1-2 persons per room                                                          | 46 (40.5, 54.3)   |
| >2 persons per room                                                           | 26.3 (19.7, 30.8) |
| <b>Food security</b>                                                          |                   |
| You and others always had enough of the kinds of food you wanted to eat       | 26.7 (21.1, 32.8) |
| You and others had enough to eat, but not always the kinds of food you wanted | 51.5 (45.3, 58)   |
| Sometimes or often you did not have enough to eat**                           | 21.8 (16.5, 27)   |

Note. CI = confidence interval.

\*Following Statistics Canada standards: calculated by dividing the number of rooms in each household (excluding the bathroom) by the number of people residing in the home, where a higher value of 'persons per room' indicates a higher level of crowding(41)

\*\* Collapsed sometimes and often you did not have enough food to eat

The data presented in Table 2 for age, gender and income quintiles compare the OHC population estimates with the total Hamilton population and a random subset of 10% of the Ontario provincial population. The three populations were very similar with respect to the gender breakdown, however, the OHC sample was younger than the general Hamilton and Ontario populations which is consistent with Census data.(42) Over 70% of the First Nations population fell into the lowest income quartile compared to 25% of the general Hamilton population and 20% of the Ontario population. At the higher end of the income scale, we observed that while 15% of Hamilton residents and 20% of the Ontario population fell into the highest income quartile, only 3% of the study population was earning in this category.

**Table 2. Gender, Age and Income Quintile for First Nations Adults, City of Hamilton and Ontario-10%**

| Variable | Sample                   |                           |                                  |                                       |
|----------|--------------------------|---------------------------|----------------------------------|---------------------------------------|
|          | OHC<br>(Total<br>N=725*) | OHC-RDS-<br>Adjusted      | Hamilton<br>(Total<br>N=536,253) | Ontario-10%<br>(Total<br>N=1,324,241) |
|          | Prevalence,<br>%         | Prevalence, %<br>(95% CI) | Prevalence,<br>%                 | Prevalence,<br>%                      |
| Sex      |                          |                           |                                  |                                       |
| Female   | 49.4                     | 37.6 (29.6, 43.6)         | 50.9                             | 51.2                                  |
| Male     | 50.6                     | 62.4 (56.4, 70.4)         | 49.1                             | 48.7                                  |

|                 |       |                   |      |      |
|-----------------|-------|-------------------|------|------|
| Age**           |       |                   |      |      |
| 18-34           | 37.4  | 41.9 (34.4, 49.9) | 28.2 | 28.2 |
| 35-49           | 37.6  | 36.6 (29.9, 43.1) | 28.1 | 29.5 |
| 50-64           | 22.9  | 20.7 (14.7, 26.9) | 24.8 | 24.8 |
| 65+             | 2.1   | 0.8 (0.3, 1.6)    | 18.9 | 17.6 |
| Income Quintile |       |                   |      |      |
| 1-Low           | 71.76 | 73 (66.5, 79.2)   | 25.1 | 19.5 |
| 2               | 16.22 | 11.8 (7.7, 16)    | 22.8 | 19.8 |
| 3               | 6.3   | 7.4 (3.6, 10.5)   | 20.3 | 19.8 |
| 4               | 2.48  | 4.9 (2.5, 9.8)    | 17   | 20.4 |
| 5-High          | 1.34  | 3 (1.1, 5.4)      | 14.7 | 20.2 |

Note. CI = confidence interval; OHC = Our Health Counts; RDS = Respondent Driven Sampling.

\*Total N reflects number of participants linked to ICES database

\*\*Age of participants on 2010-04-01

The most common self-reported chronic conditions that had been diagnosed by a health care provider among First Nations adults (n=554) in Hamilton included arthritis (30.7%; 95% CI 25.4-36.8), hypertension (25.8%; 95% CI 20.3-31.6), asthma (19%; 95% CI 14.9-24.6), diabetes (15.6%; 95% CI 11.2-21.1), heart disease (8.4%; 95% CI 4.8-12.5) and COPD (8.4%; 95% CI 5.3-11.8). The prevalence of self-reported Hepatitis C was 8.7% (95% CI 4.3-11.7). 25% reported having been injured over the past 12 months. Self-reported upper respiratory tract infection (URTI) was common, with 73% (95% CI 67.9-79.9) of adults reporting URTI in the past 12 months.

Among First Nations adults (n=554), 16.7% (95% CI 11.4 – 22.1) felt that availability of health services in their community was excellent, 43.3% (95% CI 36.1 - 49.6) felt it was good, 28.9% (95% CI 23.3 – 35.2) felt it was fair and 11.1% (95% CI 7.9 – 15.6) felt availability was poor. The fact that 40% of the population felt their level of access to health care was fair or poor, despite the geographic proximity to extensive health and social services that the City of Hamilton provides, substantiates the idea that just because the services are geographically proximate, does not mean that they are accessible to First Nations people. Close to half (47.9%) of the First Nations living in Hamilton reported that long waiting lists to see a specialist were a barrier (95% CI 41.9 - 55.4). Other common barriers included: not being able to arrange transportation; doctor not available; not being able to afford direct costs and/or transportation; services not covered by Non-Insured Health Benefits and lack of trust in health care provider.

Both acute and non-acute emergency room visits were much more frequent among First Nations in Hamilton compared to the general Hamilton and Ontario populations. According to data linkages with ICES, a striking 10.6% of the First Nations adult population in Hamilton made 6 or more emergency room visits in the previous 2 years compared to 1.6% and 1.9% of the Hamilton and Ontario adult populations respectively (Table 3).

**Table 3. Number of Emergency Room visits in the Previous 2 Years for Adults (18-64 years), First Nations, City of Hamilton and Ontario-10%**

| Frequency of ER visits       | Sample                   |                           |                                  |                                     |
|------------------------------|--------------------------|---------------------------|----------------------------------|-------------------------------------|
|                              | OHC<br>(Total<br>N=514*) | OHC<br>RDS-Adjusted       | Hamilton<br>(Total<br>N=360,378) | Ontario-10%<br>(Total<br>N=901,509) |
|                              | Prevalence,<br>%         | Prevalence, %<br>(95% CI) | Prevalence,<br>%                 | Prevalence,<br>%                    |
| None                         | 31.5                     | (25.8 – 37.5)             | 66.3                             | 69.1                                |
| 1                            | 26.2                     | (20.7 – 32.8)             | 18.7                             | 16.8                                |
| 2-5                          | 31.7                     | (25.9 – 37.8)             | 13.4                             | 12.3                                |
| 6+                           | 10.6                     | (6.2 – 14.5)              | 1.6                              | 1.9                                 |
| <b>ER visits (acute)</b>     |                          |                           |                                  |                                     |
| None                         | 50.2                     | (43.9 – 57.5)             | 78.4                             | 80.1                                |
| 1                            | 24.7                     | (18.7 – 30.1)             | 14.2                             | 13.1                                |
| 2-5                          | 20.7                     | (15.3 – 26.1)             | 6.8                              | 6.3                                 |
| 6+                           | 4                        | 1.6 – 6.9)                | 0.6                              | 0.6                                 |
| <b>ER visits (non-acute)</b> |                          |                           |                                  |                                     |
| None                         | 54.3                     | (47.6 – 61.2)             | 79.4                             | 81.2                                |
| 1                            | 22.4                     | (17.3 – 28.5)             | 14                               | 12.2                                |
| 2-5                          | 20.4                     | (14.5 – 25.4)             | 6.3                              | 6                                   |
| 6+                           | 2.9                      | (1 – 5.6)                 | 0.4                              | 0.6                                 |

Note. CI= confidence interval; OHC = Our Health Counts; RDS = Respondent Driven Sampling

\*Total N reflects number of adults aged 28-64 linked to ICES database

Based on ICES data linkages, rates of hospitalization were slightly higher among the First Nations population compared to the Hamilton and Ontario populations. This can partly be explained by a higher birth rate among First Nations populations compared to the general Canadian population,(43) which is reflected by higher rates of obstetrics hospitalization compared to the general Hamilton and Ontario population: 7.3% (95% CI, 3.9 – 10.9) of the Hamilton First Nations population between the ages of 18 and 64 years had been hospitalized at least once in the past 5 years for obstetrical reasons compared to 4% of both the general Hamilton and Ontario populations in the same age group and over the same time period. However, given the high rates of chronic diseases such as diabetes and heart disease and the much higher rates of emergency room use among the First Nations population, these findings were unexpected and therefore require further investigation.

## DISCUSSION

The OHC project generated a representative, urban Aboriginal health database. Through the successful application of RDS, a sample of urban First Nations individuals who might otherwise not have participated in mainstream surveys or the census was captured. In addition, given the current deficiency in public health information on urban First Nations populations, the statistically rigorous RDS sample allowed us to produce population-



1  
2  
3 based estimates that can be utilized by local, regional, provincial and federal policy  
4 makers as well as urban Aboriginal stakeholders to address social inequities and health  
5 disparities facing this community.  
6  
7

8 Striking levels of poverty were identified in this study. The income data  
9 presented here may be a more representative income profile of the First Nations  
10 population in Hamilton than the 2006 Census. Specifically, the OHC data were adjusted  
11 for the sampling procedure using an RDS estimator and captured more 'hidden'  
12 populations such as persons who are homeless, transient or who have low literacy skills,  
13 who are known to be under-represented in the Census.(11;13) Further evidence of low  
14 incomes among this population is provided by the RDS-adjusted ICES income quintile  
15 data, which revealed that over 70% of the OHC cohort was in the lowest income quartile  
16 compared to 25% of the general Hamilton population and 20% of the Ontario population.  
17  
18  
19

20 Accompanying high levels of poverty, housing and food insecurity were also  
21 highly prevalent among First Nations persons living Hamilton. Over half of the study  
22 population had moved at least 3 times in the past 5 years compared to 60% of the general  
23 Hamilton population who had not moved at all for the past 5 years.(34) Compared to an  
24 overcrowding rate of 3% for the general Canadian population in the 2006 Census,(1) 74%  
25 of First Nations persons in Hamilton live in crowded conditions. These findings echo  
26 those presented in the 2007 Urban Aboriginal Task Force (UATF) final report, which  
27 documented persistent obstacles with finding affordable housing, obtaining stable and  
28 secure employment and accessing appropriate services and resources among urban  
29 Aboriginal people.(44) Similarly, the Toronto Aboriginal Research Project (TARP)  
30 found that Aboriginal people in Toronto tend to concentrate in lower-income  
31 neighbourhoods where a significant proportion, particularly men, live in poverty.(45)  
32 While a growing proportion of urban Aboriginal people in Canada are achieving varying  
33 degrees of economic success in a number of skilled professions,(5;45) there remains a  
34 significant amount of unmet basic needs among this population.  
35  
36  
37  
38

39 The burden of chronic conditions experienced by First Nations adults in Hamilton  
40 is disproportionately high. For example, 19% of the OHC Hamilton population reported  
41 having been told by a health care provider that they have asthma, which is more than  
42 twice the self-reported asthma rate (9.3%) for the overall Hamilton population in the  
43 2007 Canadian Community Health Survey (CCHS).(46) Likewise, rates of arthritis and  
44 high blood pressure were 30.7% and 25.8% among First Nations adults in Hamilton  
45 compared to 19.9% and 19.7% among all adults in Hamilton as reported in the 2007  
46 CCHS.(46) For First Nations adults in Hamilton, the rate of diabetes diagnosed by a  
47 health care provider was approximately three times the rate among the general Hamilton  
48 population.(46) These findings are particularly disconcerting given the much younger  
49 age demographic of the First Nations Hamilton population and the documented barriers  
50 to receiving health care services including long wait lists, challenges with accessing and  
51 affording transportation and the unavailability of physicians in the area. Furthermore,  
52 45.8% (95% CI 38.9-52.4) of First Nations adults believed that their ability to engage in  
53 preventative health activities (i.e. regular exercise, going to the doctor or nurse for health  
54 screening tests, accessing preventative dental care) had been affected by financial  
55 hardship.  
56  
57  
58  
59  
60



1  
2  
3  
4  
5  
6  
7  
8  
9  
10  
11  
12  
13  
14  
15  
16  
17  
18  
19  
20  
21  
22  
23  
24  
25  
26  
27  
28  
29  
30  
31  
32  
33  
34  
35  
36  
37  
38  
39  
40  
41  
42  
43  
44  
45  
46  
47  
48  
49  
50  
51  
52  
53  
54  
55  
56  
57  
58  
59  
60

High rates of emergency usage by First Nations persons living in Hamilton are likely linked to the problems in accessing non-emergency health care, as revealed by 40% of the population who rated their access to health care as fair or poor and 48% who indicated that wait lists are too long. In addition, as a result of primary healthcare reforms,(47) patients may be told by their primary care providers to go to the emergency department rather than a walk-in clinic when their primary care team is not available.(48) Further examination is required to explore potential bias in hospital admission practices and to differentiate between types of hospitalizations (i.e. mental health, surgical and medical hospitalizations).

There were a number of limitations of the study. Firstly, it should be noted that we may have under sampled the elderly First Nations population living in nursing homes or residences for senior citizens in Hamilton. During our initial seed selection, we did not select any seeds from this population, and this population may have fewer network ties than other population groups, which may have resulted in an under representation of First Nations individuals over 65 years of age. Secondly, RDS cannot guarantee a random sample of network members;(49) therefore, estimates are unbiased to the degree that the assumptions of the RDS estimator are met. There is an active literature on RDS and estimation using RDS data,(50;51) and there is debate regarding the true design effects of RDS surveys.(52;53) Existing multivariable regression analyses using RDS samples have not appropriately addressed the correlation between observations and the unequal sampling probabilities inherent in RDS, therefore, we have focused on reporting prevalence estimates for which methods are better established. Despite these limitations, RDS was used to effectively recruit an urban Aboriginal population and allowed for the derivation of rigorous population estimates and data linkages that have previously not been possible.

Given the near absence of population health information for urban Aboriginal people in Canada, this research is able to provide, for the first time, First Nations data that clearly demonstrate alarming socio-economic inequities, a significant burden of chronic disease, multiple barriers in access to health care and elevated emergency room use. This newly established health database represents a significant contribution to public health that will directly inform strategic directions for the improvement of health and social status of urban Aboriginal people in Ontario. For example, this research will support the development of RDS as a tool to effectively recruit a larger cohort for longitudinal research with Aboriginal families in Ontario.

## ACKNOWLEDGEMENTS

Firstly, we would like to thank the First Nations men and women who participated in the Our Health Counts project and so generously shared their time and stories over the course of several months. The Our Health Counts project would not have been possible without the tremendous commitment and enthusiasm of the research staff at De dwa da dehs ney>s Aboriginal Health Access Centre in Hamilton. This project was funded by the Ontario Federation of Indian Friendship Centres, the Ministry of Health and Long Term Care (MOHLTC) Aboriginal Health Transition Fund, and the Centre for Research on Inner City Health (CRICH) at St. Michael's Hospital. The Institute for Clinical Evaluative Sciences (ICES) contributed the costs of the in-house ICES data analysis. Dr. Smylie was supported by a Canadian Institutes for Health Research New Investigator in Knowledge Translation award during the course of the project.

### Contributorship

M.F. contributed substantially to the study conception and design, co-led data interpretation and analysis and drafted multiple versions of the manuscript. J.S. co-led the study conception and design, data analysis and interpretation and made important contributions to the draft and final manuscript. S.M. contributed substantially to study conception and design, was a member of the governing council that guided each stage of research, represented the Aboriginal organizational lead of the research and made important revisions to the draft manuscript. DAHC was the Aboriginal community partner and supervised local data collection, participated in data analysis and interpretation. M.S. provided important technical support during data collection, co-led the data analysis and interpretation, and provided important revisions to the manuscript. P.O. contributed substantially to the study conception and design, analysis and interpretation of data and made important revisions to the draft manuscript.

### Data sharing

A tri-party data sharing agreement was negotiated between the Institute of Clinical and Evaluative Sciences (ICES), the Our Health Counts Governing Council and the Centre for Research on Inner City Health at St Michael's Hospital in Toronto, Canada. Approval would need to be granted by these three parties for access to additional, unpublished data.

### Competing Interests

None

## Reference List

- (1) Statistics Canada. Aboriginal Peoples in Canada in 2006: Inuit, Métis and First Nations, 2006 Census. Ottawa ON: Ministry of Industry; 2008.
- (2) Canadian Institute for Health Research (CIHR). CIHR Guidelines for Health Research Involving Aboriginal People. Ottawa: CIHR; 20097.
- (3) National Aboriginal Health Organization (NAHO). Ways of Knowing: A Framework for Health Research. National Aboriginal Health Organization; 2003.
- (4) Policy Research Initiative. Not Strangers in these Parts. Urban Aboriginal Peoples. 2003.
- (5) Environics Institute. Urban Aboriginal Peoples Study Main Report. Environics Institute; 2010.
- (6) Peters E., Andersen C. Indigenous in the City: Contemporary Identities and Cultural Innovation. Vancouver: UBC Press; 2013.
- (7) Andersen C. Urban Aboriginality as a Distinctive Identity, in Twelve Parts. In: Peters E., Andersen C., editors. Indigenous in the City: Contemporary Identities and Cultural Innovation. Vancouver: UBC Press; 2013. p. 46.
- (8) Garner R., Carrière G., Sanmartin C., Longitudinal Health and Administrative Data Research Team. The Health of First Nations Living Off -Reserve, Inuit, and Métis Adults in Canada: The Impact of Socio-economic Status on Inequalities in Health. Ottawa: Statistics Canada, Health Analysis Division; 2010. Report No.: 82-622-X.
- (9) Tait H. Aboriginal Peoples Survey, 2006: Inuit Health and Social Conditions. Ottawa, ON: Statistics Canada; 2008.
- (10) Smylie J. Aboriginal infant mortality rate in Canada. *Lancet* 2012;380(9851):1384.
- (11) Anderson M., Smylie J. Performance measurement systems in Canada: How well do they perform in First Nations, Inuit and Métis Contexts? *Pimatisiwin: A Journal of Aboriginal and Indigenous Community Health* 2009;7(1):99-115.
- (12) Smylie J., Fell D., Ohlsson A. A Review of Aboriginal Infant Mortality Rates in Canada: Striking and Persistent Aboriginal and Non-Aboriginal Inequities. *Canadian Journal of Public Health* 2010;101(2):143-8.

- 1
- 2
- 3
- 4 (13) Smylie J., Anderson M. Understanding the health of Indigenous peoples in
- 5 Canada: key methodologic and conceptual challenges. *Canadian Medical*
- 6 *Association Journal* 2006;165(6):602-5.
- 7
- 8 (14) Smylie J., Anderson I., Ratima M., et al. Who is Measuring and Why? Indigenous
- 9 Health Performance Measurement Systems in Canada, Australia, and New
- 10 Zealand. *The Lancet* 2006;367:2029-31.
- 11
- 12 (15) Siggner A.J. The Challenge of Measuring the Demographic and Socio-Economic
- 13 Conditions of the Urban Aboriginal Population. In: Newhouse D., Peters E.,
- 14 editors. *Strangers in these Parts: Urban Aboriginal Peoples*. Ottawa: Policy
- 15 Research Initiative; 2003. p. 119-30.
- 16
- 17
- 18 (16) Smylie J., Lofters A., Firestone M., et al. Population-Based Data and Community
- 19 Empowerment. In: O'Campo P., Dunn J., editors. *Rethinking Social*
- 20 *Epidemiology: Towards a Science of Change*. Springer Publishing Company;
- 21 2011.
- 22
- 23
- 24 (17) Graham K.A., Peters E.J. *Aboriginal Communities and Urban Sustainability*.
- 25 Ottawa: Canadian Policy Research Networks; 2002.
- 26
- 27
- 28 (18) Anderson M., Smylie J., Anderson I., et al. First Nations, Métis, and Inuit Health
- 29 Indicators in Canada. A background paper for the project "Action oriented
- 30 indicators of health and health systems development for Indigenous peoples in
- 31 Canada, Australia, and New Zealand. Saskatoon: Indigenous Peoples Health
- 32 Research Centre; 2006.
- 33
- 34
- 35 (19) Collier R. Long-form census changes worries health researchers. *Canadian*
- 36 *Medical Association Journal* 2010;182(12):E563-E564.
- 37
- 38 (20) Webster P.C. Aboriginal health programming under siege, critics charge.
- 39 *Canadian Medical Association Journal* 2012;184(14):E739-E740.
- 40
- 41 (21) Heckathorn D. Respondent driven sampling: a new approach to the study of
- 42 hidden populations. *Social Problems* 1997;44:174-99.
- 43
- 44 (22) Heckathorn D. Respondent-driven sampling II: Deriving Valid Population
- 45 Estimates from Chain referral Samples of Hidden Populations. *Social Problems*
- 46 2002;49(1):11-34.
- 47
- 48
- 49 (23) Heckathorn D, Seeman S, Broadhead R, et al. Extensions of Respondent Driven
- 50 Sampling: A new approach to the Study of Injection Drug Users aged 18-25.
- 51 *AIDS and Behavior* 2002;6(1):55-67.
- 52
- 53
- 54 (24) Evans-Campbell T., Lindhorts T., Huang B., et al. Interpersonal Violence in the
- 55 Lives of Urban American Indian and Alaska Native Women: Implications for
- 56 Health, Mental Health, and Help-Seeking. *American Journal of Public Health*
- 57 2006;96(8):1416-22.
- 58
- 59
- 60

- 1  
2  
3  
4  
5  
6  
7  
8  
9  
10  
11  
12  
13  
14  
15  
16  
17  
18  
19  
20  
21  
22  
23  
24  
25  
26  
27  
28  
29  
30  
31  
32  
33  
34  
35  
36  
37  
38  
39  
40  
41  
42  
43  
44  
45  
46  
47  
48  
49  
50  
51  
52  
53  
54  
55  
56  
57  
58  
59  
60
- (25) Abdul-Quader A., Heckathorn D, Saidel T. Implementation and Analysis of Respondent Driven Sampling: Lessons from the Field. *Journal of Urban Health* 2006;83(7):1-5.
  - (26) Greenwood M. Children as citizens of First Nations: Linking Indigenous health to early childhood development. *Pediatrics and Child Health* 2005;10(9):553-5.
  - (27) Ermine W. Aboriginal Epistemology. In: Battiste M, Barman J., editors. *First Nations Education in Canada: The Circle Unfolds*. Vancouver: UBC Press; 1995. p. 101-12.
  - (28) Smylie J., Kaplan-Myrth N., McShane K.E., et al. Indigenous Knowledge Translation: Baseline Findings in a Qualitative Study of the Pathways of Health Knowledge in Three Indigenous Communities in Canada. *Health Promotion Practice* 2009;10(3):436-46.
  - (29) Canadian Institute of Health Research, Natural Sciences and Engineering Research Council of Canada, Social Sciences and Humanities Research Council of Canada. *Tri-Council Policy Statement: Ethical Conduct for Research Involving Humans*. 2010.
  - (30) Canadian Institute for Health Research (CIHR). *CIHR Guidelines for Health Research Involving Aboriginal People*. Ottawa: CIHR; 2007.
  - (31) Ball J., Janyst P. Enacting Research Ethics Partnerships with Indigenous Communities and Canada: "Do it in a Good Way.". *Journal of Empirical Research on Human Research Ethics* 2008;3(2):33-51.
  - (32) First Nations Centre. *First Nations Conceptual Frameworks and Applied Models on Ethics, Privacy, and Consent in Health Research and Information*. Ottawa: National Aboriginal Health Organization (NAHO); 2006.
  - (33) Ontario Federation of Indian Friendship Centres (OFIFC). *USAI Utility Self-Voicing Access Inter-relationship Reserach Framework*. 2012.
  - (34) Statistics Canada. Hamilton, Ontario (Code3525005) (table). 2006 Community Profiles. 2006 Census. Ottawa ON: Statistics Canada; 2007. Report No.: Catalogue no. 92-591-XWE.
  - (35) Salganik M.J. Variance estimation, design effects, and sample size calculations for respondent-driven sampling. *Journal of Urban Health* 2006;83(6 (Suppl)):98-112.
  - (36) Firestone M. *Our Health Counts: Unmasking Health and Social Disparities among Urban Aboriginal People in Ontario* University of Toronto; 2013.
  - (37) IBM® SPSS® Data Collection Author [computer program]. Version 6.0.1. Chicago, IL: SPSS Inc.; 2000.

- 1  
2  
3  
4  
5  
6  
7  
8  
9  
10  
11  
12  
13  
14  
15  
16  
17  
18  
19  
20  
21  
22  
23  
24  
25  
26  
27  
28  
29  
30  
31  
32  
33  
34  
35  
36  
37  
38  
39  
40  
41  
42  
43  
44  
45  
46  
47  
48  
49  
50  
51  
52  
53  
54  
55  
56  
57  
58  
59  
60
- (38) Respondent-Driven Sampling Analysis Tool (RDSAT) Version 7.1 [computer program]. Ithaca, New York: Cornell University; 2007.
- (39) Wejnert C. An Empirical Test of Respondent-Driven Sampling: Point Estimates, Variance, Degree Measures, and Out-of-Equilibrium Data. *Sociological Methodology* 2009;39(1):73-116.
- (40) Firestone M., Smylie J, Maracle S., et al. Concept Mapping: Application of a Community-Based Methodology in three Urban Aboriginal Populations. *American Indian Culture and Research Journal*, Under Review 2014;38(4).
- (41) Statistics Canada. Persons per room of private household. <http://www.statcan.gc.ca/concepts/definitions/dwelling-logement-07-eng.html> 2013 Available from: URL: <http://www.statcan.gc.ca/concepts/definitions/dwelling-logement-07-eng.html>
- (42) Statistics Canada no.92-594-XWE. Hamilton, Ontario (Code 3525005) (table). Aboriginal Population Profile. 2006 Census. <http://www12.statcan.ca/census-recensement/2006/dp-pd/prof/92-594/index.cfm?Lang=E> (accessed January 20, 2014) 2007 [cited 11 A.D. Apr 30];
- (43) Health Canada. A Statistical Profile on the Health of First Nations in Canada, for the Year 2000. Ottawa; 2005. Report No.: H35-4/30-2000E-PDF.
- (44) Ontario Federation of Indian Friendship Centres (OFIFC), Ontario Métis Aboriginal Association, Ontario Native Women's Association (ONWA). Urban Aboriginal Task Force Final Report. Toronto ON; 2007.
- (45) McCaskill D., FitzMaurice K., Cidro J. Toronto Aboriginal Research Project (TARP) Final Report. 2011.
- (46) Statistics Canada. Canadian Community Health Survey. Ottawa ON: Statistics Canada; 2007.
- (47) Muldoon L., Rowan M.S., Geneau R., et al. Models of primary care Service delivery in Ontario: Why such diversity? *Healthcare Management Forum* 2006;19(4):18-23.
- (48) Howard M., Goertzen J., Kaczorowski J., et al. Emergency Department and Walk-in Clinic Use in Models of Primary Care Practice with Different After Hours Accessibility in Ontario. *Health Care Policy* 2008;4(1):73-88.
- (49) Heimer R. Critical Issues and Further Questions About Respondent-Driven Sampling: Comment on Ramirez-Valles, *et al.* (2005). *AIDS and Behavior* 2005;9(4):403-8.
- (50) Gile K.J., Handcock M.S. Respondent-Driven Sampling: An Assessment of Current Methodology. *Sociological Methodology* 2010;40(1):285-327.

- 1  
2  
3  
4  
5  
6  
7  
8  
9  
10  
11  
12  
13  
14  
15  
16  
17  
18  
19  
20  
21  
22  
23  
24  
25  
26  
27  
28  
29  
30  
31  
32  
33  
34  
35  
36  
37  
38  
39  
40  
41  
42  
43  
44  
45  
46  
47  
48  
49  
50  
51  
52  
53  
54  
55  
56  
57  
58  
59  
60
- (51) Heckathorn D. Extensions of respondent-driven sampling: analyzing continuous variables and controlling for differential recruitment. *Sociological Methodology* 2007;37(1):151-208.
- (52) Goel S., Salganik M.J. Assessing respondent-driven sampling. *Proceedings of the National Academy of Sciences of the United States of America* 2010;107(15):6743-7.
- (53) Wejnert C., Pham H., Krishna N., et al. Estimating design effect and calculating sample size for respondent-driven sampling studies of injection drug users in the United States. *AIDS Behavior* 2012;16(4):797-806.



1  
2  
3  
4  
5  
6  
7  
8  
9 Unmasking Health Determinants and Health Outcomes for Urban First Nations Using  
10 Respondent Driven Sampling ~~Using Respondent Driven Sampling to Unmask~~  
11 ~~Disparities in Social Determinants of Health and Health Outcomes for Urban First~~  
12 ~~Nations People Living in Hamilton, Ontario~~  
13

14 Firestone M., Smylie J., Maracle S., Spiller M., De dwa da dehs ney>s Aboriginal Health  
15 Access Centre, O'Campo P.

16  
17 **Corresponding Author:**

18 Firestone, Michelle  
19 Post-Doctoral Fellow, Centre for Research on Inner City Health (CRICH), St. Michael's  
20 Hospital  
21 209 Victoria, 3rd floor  
22 Toronto, Ontario Canada M5B 1C6  
23 Email: firestonem@smh.ca  
24 Phone: 416-864-6060 ext 77437  
25 Fax: 416-864-5558

26  
27 Smylie, Janet  
28 Research Scientist, Centre for Research on Inner City Health (CRICH)  
29 Associate Professor, Department of Public Health Sciences, University of Toronto  
30 Toronto, Canada

31 Maracle, Sylvia  
32 Executive Director, Ontario Federation of Indian Friendship Centres (OFIFC)  
33 Toronto, Canada

34  
35 De dwa da dehs ney>s Aboriginal Health Access Centre (~~DHACDAHC~~)  
36 Hamilton, Canada

37  
38 O'Campo, Patricia  
39 Director, Centre for Research on Inner City Health  
40 Professor, Dalla Lana School of Public Health, University of Toronto  
41 Toronto, Canada

42  
43 **Keywords:** Canada; urban Aboriginal health; First Nations; Respondent-Driven  
44 Sampling; Community-based Research

45 **Word Count:** 2,9643,739  
46  
47  
48  
49  
50  
51  
52  
53  
54

## ABSTRACT

**Objective:** Population based health information on urban Aboriginal populations in Canada is limited due to challenges with the identification of Aboriginal persons in existing health datasets. ~~By implementing Respondent Driven Sampling (RDS), the Our Health Counts study in partnership with De dwa da dehs ney>s Aboriginal Health Access Centre (DAHC) aimed to generate a representative sample of First Nations individuals living in Hamilton, Ontario. The main objective of the Our Health Counts (OHC) project was to work in partnership with Aboriginal stakeholders to generate a culturally relevant, representative baseline health data set for three urban Aboriginal communities in Ontario, Canada.~~

**Design:** Respondent-Driven Sampling.

**Setting:** Hamilton, Ontario, Canada.

**Participants:** ~~The OHC study, in partnership with De dwa da dehs ney>s Aboriginal Health Access Centre (DAHC) recruited~~ 554 First Nations adults living in Hamilton ~~were recruited~~ using RDS.

**Results:** Among First Nations adults living in Hamilton, 78% earned less than \$20,000 per year and 70% lived in the lowest income quartile neighbourhoods. Mobility and crowded living conditions were also highly prevalent. Common chronic diseases included arthritis, hypertension, diabetes and COPD and rates of emergency room access were elevated.

**Conclusions:** RDS is an effective sampling method in urban Aboriginal contexts as it builds upon existing social networks and successfully identified a population-based cohort. The findings illustrate striking disparities in health determinants and health outcomes between urban First Nations individuals and the general population.

## ARTICLE SUMMARY

### Strengths and limitations of this study:

- Our study is the first ~~in Canada to provide population based health assessment data for urban First Nations, documenting striking health and social inequities~~ RDS of self-identified First Nations people residing in an urban setting in Canada
- This study models best practices in academic-Aboriginal community research partnerships
- RDS has been demonstrated to be a promising tool for generating Aboriginal health assessment measures in urban areas where there are limited existing sampling frame options

1  
2  
3  
4  
5  
6  
7  
8  
9  
10  
11  
12  
13  
14  
15  
16  
17  
18  
19  
20  
21  
22  
23  
24  
25  
26  
27  
28  
29  
30  
31  
32  
33  
34  
35  
36  
37  
38  
39  
40  
41  
42  
43  
44  
45  
46  
47  
48  
49  
50  
51  
52  
53  
54  
55  
56  
57  
58  
59  
60

- At present, multivariable regression analyses using RDS samples have not appropriately addressed the co-relation between observations and the unequal sampling probabilities inherent in RDS; therefore we present prevalence estimates for which methods are better established

For peer review only

INTRODUCTION

According to the 2006 Census, over 60% (150,570 people) of Aboriginal<sup>a</sup> people living in Ontario live in urban areas.(1) Nearly seven out of ten Métis live in urban areas, and about three out of every four people in the off-reserve First Nations population live in urban areas.(1) First Nations people have historically been dislocated from their original homelands and may constitute diasporic, heterogeneous communities in urban areas.(2) Specifically, an increasing number of First Nations individuals are moving to urban centres to seek better housing, employment and education opportunities and for the services and amenities available.(3-5) There is a growing body of literature exploring the complexities of urban Indigeneity (6) and some of the elements which distinguish urban Aboriginal identity are social and economic marginalization, a growing middle class, and population diversity in term so cultural origins and legal status.(7) According to the Canadian Census, First Nations, Inuit, and Métis populations experience ongoing disparities in social determinants of health such as income insecurity, unemployment, low levels of education, decreased food availability, and inadequate housing compared to non-Aboriginal Canadians, and these disparities are exacerbated with urban residence.(1;8;9)

Despite the growing size of the urban Aboriginal population in Canada, accessible and culturally relevant population health data for this population are almost non-existent.(10-13) While census data do exist, there are serious deficits in population health measures.(13) Some of the reasons behind this deficiency are limitations in the current health information system and data collection processes with respect to Aboriginal peoples.(14;15) Sampling frames are often biased and comprise non-random subpopulations such as lists of members or clients of particular programs and services in the community. When urban Aboriginal people have been included in census-based national surveys, these surveys were underpowered and often First Nations, Inuit, and Métis data could not be successfully disaggregated.(14;16) Additionally, studies based on Census data show that a significant number of Aboriginal people move from rural and reserve areas to cities, and back and forth as well as within and among cities.(4;17) These factors make it difficult to get reliable counts of the Aboriginal population of a city.

At the national level, the continued inability to identify Aboriginal peoples in healthcare databases leads to very poor coverage of Aboriginal populations in Canada,

<sup>a</sup> “Aboriginal people” is a collective name for all of the original peoples of Canada and their descendants. The *Constitution Act* of 1982 specifies that the Aboriginal Peoples in Canada consist of three groups: Indians, Inuit and Métis. The term First Nations came into common use in the 1970s to replace Indian, which some people found offensive. Despite its widespread use, there is no legal definition for this term in Canada. In the United States, the term “Native American” is used to represent Indigenous peoples from North America, including Mexico. For alignment with the US Constitution and to ensure policy implications, the term “American Indian” is still used for Indigenous populations living within US borders, particularly the lower 48 states and parts of Alaska. “Indigenous” is a term used in the international context.

Field Code Changed

with a specific paucity of health information for First Nations, Métis, and Inuit living in urban areas. Provincial and territorial systems generally do not collect ethnic-specific utilization data, and their ethnic flags for vital statistics are inconsistent or absent.(18) The federal government’s decision to cancel the long form of the Canadian national census will further challenge the ability of researchers and communities to identify and address social inequities across and within populations who experience racialization and the negative effects of structural discrimination in healthcare and other sectors across ethnic groups and will, thus widening the existing health and social policy vacuum.(19;20)

Field Code Changed

Field Code Changed

In the absence of an accessible and accurate population based sampling frame for urban Aboriginal people, we implemented respondent driven sampling (RDS) for the Our Health Counts (OHC) study. RDS, like other chain-referral approaches, relies on members of a population to recruit their peers.(21;22) However, RDS differs from other methods because of estimation procedures that adjust for the participants’ different probabilities of being sampled.(22) RDS also differs from other chain-referral methods because the number of recruitments any participant can make is limited, and it employs a dual incentive structure where participants are rewarded both for participating and for recruiting their peers.(23)

Field Code Changed

Field Code Changed

Field Code Changed

There is limited literature on RDS in Indigenous contexts;(24) however, there is evidence that links the success of RDS to the strength of social networks and relationships.(25) Indigenous knowledges are holistic, relational and embraces a fluidity that allows for constant growth and change.(26;27) Aboriginal identity-identities values the group over the individual, thereby establishing models of kinship whereby everyone has the right to give and receive according their own choices.(26) Therefore, we hypothesized that RDS would be an appropriate and effective sampling methodology as it builds on social networks and would draw on existing kinship systems known to be present in Indigenous communities.(28)

Field Code Changed

The main objective of the OHC project was to work in partnership with Aboriginal stakeholders to generate a culturally relevant, representative baseline health data set for three urban Aboriginal communities in Ontario, Canada. The results presented here pertain specifically to the urban First Nations population in Hamilton where the organizational project lead was the Ontario Federation of Indian Friendship Centres (OFIFC) and the community partner was De dwa da dehs ney>s Aboriginal Health Access Centre (DHACDAHC).

## METHODS

### Community-based participatory research

This study upheld current ethical and scientific standards in Indigenous health research(29-33) through a community based participatory research partnership between the academic research team, OFIFC and DHACDAHC. We ensured that our Aboriginal decision making partners were active in all aspects of the research through the following mechanisms: Aboriginal leadership; research agreements which explicitly addressed issues of project governance, community expectations, benefits, ownership, control,

Formatted: Font: Times New Roman, 12 pt

Formatted: Plain Text

Field Code Changed

Formatted: Font: Times New Roman, 12 pt

Formatted: Font: Times New Roman, 12 pt

Formatted: Font: Times New Roman, 12 pt

1  
2  
3  
4  
5  
6  
7  
8 access, and possession of information, and dissemination of project results; capacity  
9 building through staffing at community sites, data workshops and awareness building;  
10 respect for the individual and collective rights of Aboriginal peoples with respect to their  
11 health information; cultural relevance through the development and application of  
12 culturally appropriate measures; representation of the urban Aboriginal population of  
13 Ontario; and sustainability of the project to ensure that this database can be  
14 geographically and longitudinally expanded. Data sharing and research agreements  
15 ensured that DHAC/DAHC led the governance and management of data throughout the  
16 course of the study. In addition, a Governing Council, comprised of representatives from  
17 the core urban Aboriginal provincial organizations was established to oversee all stages  
18 of the research process. Specifically, this body adhered to governance protocols and  
19 ensured that individual and collective community rights were respected, were kept  
20 informed about the project's progress and led the project towards meaningful results,  
21 acted as a resource to the community on questions related to various portions of the  
22 research project and controlled the release of all data generated by the study.

Formatted: Font: Times New Roman, 12 pt

23  
24 All members of the study team were from the Aboriginal community, living in the  
25 general vicinity of the city of Hamilton. Formal ethics approval was provided by the  
26 Research Ethics Board of St. Michael's Hospital in Toronto, ~~Canada and the OHC~~  
27 ~~Governing Council.~~

### 28 Study Site

29  
30 The City of Hamilton is located in southern Ontario on what was traditionally  
31 Haudenosaunee (Iroquian) territory and is near two First Nations reserves: Six Nations of  
32 the Grand River and Mississaugas of the New Credit. According to the 2006 Census, the  
33 total Aboriginal population in Hamilton was 13,735 people, comprising 2.8% of the total  
34 population of the city.<sup>(34)</sup> The OFIFC identified the city of Hamilton as a promising  
35 community site based on its significant Aboriginal population and strong infrastructure of  
36 Aboriginal community services.

Field Code Changed

### 37 Recruitment

38  
39 The RDS process was initiated through the purposive selection of individuals to begin  
40 recruitment, also called "seeds." Inclusion criteria for participation in the study included  
41 18 years of age, residence within the geographic boundaries of the City of Hamilton and  
42 self-identified as having First Nations identity. First Nations identity was determined  
43 through open dialogue around family, experiences, and location while also explaining the  
44 overall study goals and additional study sites in Ottawa. Questions such as: "What words  
45 best describe you?" and "How do you see yourself?" were useful. With the help of  
46 community partners, six seeds were identified and agreed to participate. In order for  
47 seeds to reflect a diverse demographic of First Nations people living in Hamilton, factors  
48 such as gender, age, family size, and occupations were considered in their selection. For  
49 example, seeds were identified in the student population, among the steel workers union,  
50 among artists, elders, housing and social assistance providers as well as members of local  
51 Aboriginal organizations and boards. Five of the six seeds produced referrals within the  
52 two weeks leading up to the December 2009 holiday closure at DAHC. In February and  
53  
54  
55  
56  
57  
58  
59  
60

1  
2  
3  
4  
5  
6  
7  
8 March 2010, three additional seeds were added.  
9

10 Study participants, including seeds, provided informed consent and then  
11 completed a health assessment survey after which they received 3-5 coded coupons to  
12 refer a member of their social network into the study. Following the holiday closure of  
13 ~~DHACDAHC~~, the number of distributed coupons per recruit was increased from 3 to 5 in  
14 order to increase the rate of recruitment. Participants received a monetary reimbursement  
15 of \$20 for their time and participation. They also received an additional \$10 for every  
16 eligible person they recruited into the study. Study recruitment and interviews took place  
17 in an Aboriginal community centre.  
18

19 For sample size calculation, we assumed 95% confidence intervals (CI), survey  
20 item prevalence ranges from 10% to 75% and a design effect of 2.<sup>(35)</sup> Based on this  
21 formula, the OCH study aimed to recruit 500 First Nations adults and 250 children.  
22

### 23 Sources of Data

24 Community concept mapping was implemented to develop a community specific survey  
25 for First Nations in Hamilton, <sup>(36)</sup> which was comprised of 8 domains covering areas  
26 such as sociodemographics, physical, mental, and emotional health, First Nations identity  
27 and impacts of colonization ([i.e. questions about Residential School attendance,](#)  
28 [involvement of child protection agencies, dislocation from traditional lands and](#)  
29 [discrimination](#)), and access and barriers to care. The survey tool was piloted with First  
30 Nations community members, and minor modifications were made to improve face  
31 validity. Data were collected and compiled by computer-assisted personal interviewing  
32 with a computer based version of the survey tool developed by the research team using  
33 SPSS Data Collection Author and Collector.<sup>(37)</sup>  
34

35 Upon completion of recruitment and survey, our sample of First Nations adults  
36 was linked to data holdings at the Institute of Clinical Evaluative Sciences (ICES)  
37 including provincial records of emergency room and hospital visits (Canadian Institutes  
38 of Health Information – Discharge Abstract Database and National Ambulatory Care  
39 Reporting System: Emergency), and neighbourhood income quintiles (derived from  
40 Census data). Using health care system identification numbers (i.e. Ontario Health Card)  
41 provided by participants, we successfully linked 92% (N=725) of First Nations adults to  
42 the ICES database.  
43

### 44 Analysis

45 Recruitment dynamics, adjusted population based estimates and confidence intervals  
46 were calculated using the RDS-I enhanced data smoothing estimator in the custom  
47 RDSAT software (version 7.1).<sup>(38)</sup> The RDS methodology anticipates that personal  
48 networks are not randomly distributed, and therefore adjusts for small to moderate levels  
49 of network clustering (people who have ties to others like them), in the form of post-  
50 sampling weights.  
51

### 52 RESULTS

53  
54  
55  
56  
57  
58  
59  
60

Field Code Changed

Field Code Changed

Field Code Changed

Field Code Changed



Among First Nations adults in Hamilton, 78.9% of participants were recruited via referral trees originating from two seeds. With 19 and 32 waves respectively, the lengths of both of these recruitment chains were long enough to overcome the original sampling bias, which usually happens after 6 or 7 waves of recruitment.(39) The statistical theory is that if the chain-referral process consists of enough waves or cycles of recruitment, the composition of the final sample with respect to key characteristics and behaviors will become independent of the seeds from which it began. The point at which the sample composition becomes stable is termed “equilibrium” and is an indication that RDS has been implemented successfully.(21)

Field Code Changed

Field Code Changed

Over a period of four and a half months (November 2009 to March 2010) a total of 790 persons were recruited, including 554 adults and 236 children Overall, a high response rate for survey questions was observed. Specifically, non-response rates ranged from 2.5% to less than 0.5%. Even more sensitive questions around income, food security, and impacts of colonization had very low non-response rates under 2%. Such high response rates can be attributed to the survey tool itself, which reflected the health priorities of the community(40) and which was administered in a safe and culturally secure context. Demographic and social characteristics are presented in Table 1.

**Table 1. Demographic and social characteristics of First Nations adults (Total N=554)**

| Characteristic                                                                  | Prevalence % (95% CI) |
|---------------------------------------------------------------------------------|-----------------------|
| <b>Sex</b>                                                                      |                       |
| Male                                                                            | 59.9 (53.3, 67.2)     |
| <b>Age</b>                                                                      |                       |
| 18-34                                                                           | 40.2 (33.3, 48)       |
| 35-49                                                                           | 35.4 (28.7, 41.6)     |
| 50+                                                                             | 24.4 (18.4, 30.8)     |
| <b>Education</b>                                                                |                       |
| Some high school or less                                                        | 57.3 (51.1, 64)       |
| Completed high school                                                           | 19.5 (14.5, 24.7)     |
| Some or completed college                                                       | 18.3 (13.3, 23.3)     |
| Some or completed University                                                    | 5 (2.4, 8)            |
| <b>Income sources for household</b>                                             |                       |
| Provincial or municipal social assistance or welfare (e.g. ODSP, Ontario Works) | 69.2 (63.1, 75)       |
| Wages and salaries                                                              | 28.2 (22.1, 34.2)     |
| Child Tax Benefit                                                               | 17 (12.4, 21.8)       |
| Any other income support                                                        | 13.3 (9.2, 17.6)      |
| Employment insurance                                                            | 9.6 (5.4, 14.3)       |
| Income from self-employment                                                     | 7.7 (4.3, 11.7)       |
| Child Support <u>payments</u>                                                   | 3 (1.1, 4.6)          |
| <b>Individual annual income</b>                                                 |                       |
| \$0-4,999                                                                       | 18.3 (13.4, 24.8)     |
| \$5,000-5,999                                                                   | 23.1 (17.1, 28.5)     |

|                                                                               |                   |
|-------------------------------------------------------------------------------|-------------------|
| \$10,000-14,999                                                               | 21.9 (16.3, 27.6) |
| \$15,000-19,999                                                               | 14.8 (10.7, 20)   |
| \$20,000+                                                                     | 21.8 (16, 27.6)   |
| <b>Mobility</b>                                                               |                   |
| No moves in past 5 years                                                      | 10.2 (6.2, 14.8)  |
| 1 move in past 5 years                                                        | 15.5 (10.5, 20.6) |
| 2 moves in past 5 years                                                       | 20.2 (15.4, 26.4) |
| 3-5 moves in past 5 years                                                     | 41.1 (35, 48.6)   |
| 6-10 moves in past 5 years                                                    | 10.4 (5.7, 13.4)  |
| <b>Overcrowding*</b>                                                          |                   |
| <=1 persons per room                                                          | 27.7 (21.6, 33.8) |
| 1-2 persons per room                                                          | 46 (40.5, 54.3)   |
| >2 persons per room                                                           | 26.3 (19.7, 30.8) |
| <b>Food security</b>                                                          |                   |
| You and others always had enough of the kinds of food you wanted to eat       | 26.7 (21.1, 32.8) |
| You and others had enough to eat, but not always the kinds of food you wanted | 51.5 (45.3, 58)   |
| Sometimes or often <u>you</u> did not have enough to eat**                    | 21.8 (16.5, 27)   |

Note. CI = confidence interval.

\*Following Statistics Canada standards: calculated by dividing the number of rooms in each household (excluding the bathroom) by the number of people residing in the home, where a higher value of 'persons per room' indicates a higher level of crowding(41)

\*\* Collapsed sometimes and often you did not have enough food to eat

Formatted: Font: Times New Roman

The data presented in Table 2 for age, gender and income quintiles compare the OHC population estimates with the total Hamilton population and a random subset of 10% of the Ontario provincial population. The three populations were very similar with respect to the gender breakdown, however, the OHC sample was younger than the general Hamilton and Ontario populations which is consistent with Census data. (42)(40) Over 70% of the First Nations population fell into the lowest income quartile compared to 25% of the general Hamilton population and 20% of the Ontario population. At the higher end of the income scale, we observed that while 15% of Hamilton residents and 20% of the Ontario population fell into the highest income quartile, only 3% of the study population was earning in this category.

Field Code Changed

**Table 2. Gender, Age and Income Quintile for First Nations Adults, City of Hamilton and Ontario-10%**

| Variable | Sample                   |                           |                                  |                                       |
|----------|--------------------------|---------------------------|----------------------------------|---------------------------------------|
|          | OHC<br>(Total<br>N=725*) | OHC-RDS-<br>Adjusted      | Hamilton<br>(Total<br>N=536,253) | Ontario-10%<br>(Total<br>N=1,324,241) |
|          | Prevalence,<br>%         | Prevalence, %<br>(95% CI) | Prevalence,<br>%                 | Prevalence,<br>%                      |

|                 |       |                   |      |      |
|-----------------|-------|-------------------|------|------|
| Sex             |       |                   |      |      |
| Female          | 49.4  | 37.6 (29.6, 43.6) | 50.9 | 51.2 |
| Male            | 50.6  | 62.4 (56.4, 70.4) | 49.1 | 48.7 |
| Age**           |       |                   |      |      |
| 18-34           | 37.4  | 41.9 (34.4, 49.9) | 28.2 | 28.2 |
| 35-49           | 37.6  | 36.6 (29.9, 43.1) | 28.1 | 29.5 |
| 50-64           | 22.9  | 20.7 (14.7, 26.9) | 24.8 | 24.8 |
| 65+             | 2.1   | 0.8 (0.3, 1.6)    | 18.9 | 17.6 |
| Income Quintile |       |                   |      |      |
| 1-Low           | 71.76 | 73 (66.5, 79.2)   | 25.1 | 19.5 |
| 2               | 16.22 | 11.8 (7.7, 16)    | 22.8 | 19.8 |
| 3               | 6.3   | 7.4 (3.6, 10.5)   | 20.3 | 19.8 |
| 4               | 2.48  | 4.9 (2.5, 9.8)    | 17   | 20.4 |
| 5-High          | 1.34  | 3 (1.1, 5.4)      | 14.7 | 20.2 |

Note. CI = confidence interval; OHC = Our Health Counts; RDS = Respondent Driven Sampling.

\*Total N reflects number of participants linked to ICES database

\*\*Age of participants on 2010-04-01

The most common **self-reported** chronic conditions that had been diagnosed by a health care provider among First Nations adults (n=554) in Hamilton included arthritis (30.7%; 95% CI 25.4-36.8), hypertension (25.8%; 95% CI 20.3-31.6), asthma (19%; 95% CI 14.9-24.6), diabetes (15.6%; 95% CI 11.2-21.1), heart disease (8.4%; 95% CI 4.8-12.5) and COPD (8.4%; 95% CI 5.3-11.8). The prevalence of **self-reported** Hepatitis C was 8.7% (95% CI 4.3-11.7). 25% **had reported having** been injured over the past 12 months. **Self-reported** Upper respiratory tract infection (URTI) was common, with 73% (95% CI 67.9-79.9) of adults reporting URTI in the past 12 months.

Among First Nations adults (n=554), 16.7% (95% CI 11.4 – 22.1) felt that availability of health services in their community was excellent, 43.3% (95% CI 36.1 - 49.6) felt it was good, 28.9% (95% CI 23.3 – 35.2) felt it was fair and 11.1% (95% CI 7.9 – 15.6) felt availability was poor. **The fact that 40% of the population felt their level of access to health care was fair or poor, despite the geographic proximity to extensive health and social services that the City of Hamilton provides, substantiates the idea that just because the services are geographically proximate, does not mean that they are accessible to First Nations people.** Close to half (47.9%) of the First Nations living in Hamilton reported that long waiting lists **to see a specialist** were a barrier (95% CI 41.9 - 55.4). Other common barriers included: not being able to arrange transportation; doctor not available; not being able to afford direct costs and/or transportation; services not covered by Non-Insured Health Benefits and lack of trust in health care provider.

Both acute and non-acute emergency room visits were much more frequent among First Nations in Hamilton compared to the general Hamilton and Ontario populations. **According to data linkages with ICES, a** striking 10.6% of the First Nations adult population in Hamilton **reported made** 6 or more emergency room visits in the

**Formatted:** Indent: First line: 0", Space Before: 0 pt, Don't adjust space between Latin and Asian text, Don't adjust space between Asian text and numbers

previous 2 years compared to 1.6% and 1.9% of the Hamilton and Ontario adult populations respectively (Table 3).

**Table 3. Number of Emergency Room visits in the Previous 2 Years for Adults (18-64 years), First Nations, City of Hamilton and Ontario-10%**

| Frequency of ER visits       | Sample             |                        |                            |                               |
|------------------------------|--------------------|------------------------|----------------------------|-------------------------------|
|                              | OHC (Total N=514*) | OHC RDS-Adjusted       | Hamilton (Total N=360,378) | Ontario-10% (Total N=901,509) |
|                              | Prevalence, %      | Prevalence, % (95% CI) | Prevalence, %              | Prevalence, %                 |
| None                         | 31.5               | (25.8 – 37.5)          | 66.3                       | 69.1                          |
| 1                            | 26.2               | (20.7 – 32.8)          | 18.7                       | 16.8                          |
| 2-5                          | 31.7               | (25.9 – 37.8)          | 13.4                       | 12.3                          |
| 6+                           | 10.6               | (6.2 – 14.5)           | 1.6                        | 1.9                           |
| <b>ER visits (acute)</b>     |                    |                        |                            |                               |
| None                         | 50.2               | (43.9 – 57.5)          | 78.4                       | 80.1                          |
| 1                            | 24.7               | (18.7 – 30.1)          | 14.2                       | 13.1                          |
| 2-5                          | 20.7               | (15.3 – 26.1)          | 6.8                        | 6.3                           |
| 6+                           | 4                  | 1.6 – 6.9)             | 0.6                        | 0.6                           |
| <b>ER visits (non-acute)</b> |                    |                        |                            |                               |
| None                         | 54.3               | (47.6 – 61.2)          | 79.4                       | 81.2                          |
| 1                            | 22.4               | (17.3 – 28.5)          | 14                         | 12.2                          |
| 2-5                          | 20.4               | (14.5 – 25.4)          | 6.3                        | 6                             |
| 6+                           | 2.9                | (1 – 5.6)              | 0.4                        | 0.6                           |

Note. CI= confidence interval; OHC = Our Health Counts; RDS = Respondent Driven Sampling

\*Total N reflects number of adults aged 28-64 linked to ICES database

Based on ICES data linkages, rates of hospitalization were slightly higher among the First Nations population compared to the Hamilton and Ontario populations. This can partly be explained by a higher birth rate among First Nations populations compared to the general Canadian population, (43)(41) which is reflected by higher rates of obstetrics hospitalization compared to the general Hamilton and Ontario population: 7.3% (95% CI, 3.9 – 10.9) of the Hamilton First Nations population between the ages of 18 and 64 years had been hospitalized at least once in the past 5 years for obstetrical reasons compared to 4% of both the general Hamilton and Ontario populations in the same age group and over the same time period. However, given the high rates of chronic diseases such as diabetes and heart disease and the much higher rates of emergency room use among the First Nations population, these findings were unexpected and therefore require further investigation.

## DISCUSSION

Field Code Changed

1  
2  
3  
4  
5  
6  
7  
8  
9 The OHC project generated a representative, urban Aboriginal health database. Through  
10 the successful application of RDS, a sample of urban First Nations individuals who might  
11 otherwise not have participated in mainstream surveys or the census was captured. In  
12 addition, given the current deficiency in public health information on urban First Nations  
13 populations, the statistically rigorous RDS sample allowed us to produce population-  
14 based estimates that can be utilized by local, regional, provincial and federal policy  
15 makers as well as urban Aboriginal stakeholders to address social inequities and health  
16 disparities facing this community.

17  
18 Striking levels of poverty were identified in this study. The income data  
19 presented here may be a more representative income profile of the First Nations  
20 population in Hamilton than the 2006 Census. Specifically, the OHC data were adjusted  
21 for the sampling procedure using an RDS estimator and captured more 'hidden'  
22 populations such as persons who are homeless, transient or who have low literacy skills,  
23 who are known to be under-represented in the Census.<sup>(11;13)</sup> Further evidence of low  
24 incomes among this population is provided by the RDS-adjusted ICES income quintile  
25 data, which revealed that over 70% of the OHC cohort was in the lowest income quartile  
26 compared to 25% of the general Hamilton population and 20% of the Ontario population.

27  
28 Accompanying high levels of poverty, housing and food insecurity were also  
29 highly prevalent among First Nations persons living Hamilton. Over half of the study  
30 population had moved at least 3 times in the past 5 years compared to 60% of the general  
31 Hamilton population who had not moved at all for the past 5 years.<sup>(34)</sup> Compared to an  
32 overcrowding rate of 3% for the general Canadian population in the 2006 Census,<sup>(1)</sup> 74%  
33 of First Nations persons in Hamilton live in crowded conditions. These findings echo  
34 those presented in the 2007 Urban Aboriginal Task Force (UATF) final report, which  
35 documented persistent obstacles with finding affordable housing, obtaining stable and  
36 secure employment and accessing appropriate services and resources among urban  
37 Aboriginal people.<sup>(44)(42)</sup> Similarly, the Toronto Aboriginal Research Project (TARP)  
38 found that Aboriginal people in Toronto tend to concentrate in lower-income  
39 neighbourhoods where a significant proportion, particularly men, live in poverty.<sup>(45)(43)</sup>  
40 While a growing proportion of urban Aboriginal people in Canada are achieving varying  
41 degrees of economic success in a number of skilled professions,<sup>(5;45)(5;43)</sup> there  
42 remains a significant amount of unmet basic needs among this population.

43  
44 The burden of chronic conditions experienced by First Nations adults in Hamilton  
45 is disproportionately high. For example, 19% of the OHC Hamilton population reported  
46 having been told by a health care provider that they have asthma, which is more than  
47 twice the self-reported asthma rate (9.3%) for the overall Hamilton population in the  
48 2007 Canadian Community Health Survey (CCHS).<sup>(46)(44)</sup> Likewise, rates of arthritis  
49 and high blood pressure were 30.7% and 25.8% among First Nations adults in Hamilton  
50 compared to 19.9% and 19.7% among all adults in Hamilton as reported in the 2007  
51 CCHS.<sup>(46)(44)</sup> For First Nations adults in Hamilton, the rate of diabetes diagnosed by a  
52 health care provider was approximately three times the rate among the general Hamilton  
53 population.<sup>(46)(44)</sup> These findings are particularly disconcerting given the much  
54 younger age demographic of the First Nations Hamilton population and the documented  
55 barriers to receiving health care services including long wait lists, challenges with

Field Code Changed

1  
2  
3  
4  
5  
6  
7  
8  
9  
10  
11  
12  
13  
14  
15  
16  
17  
18  
19  
20  
21  
22  
23  
24  
25  
26  
27  
28  
29  
30  
31  
32  
33  
34  
35  
36  
37  
38  
39  
40  
41  
42  
43  
44  
45  
46  
47  
48  
49  
50  
51  
52  
53  
54  
55  
56  
57  
58  
59  
60

accessing and affording transportation and the unavailability of physicians in the area. Furthermore, 45.8% (95% CI 38.9-52.4) of First Nations adults believed that their ability to engage in preventative health activities (i.e. regular exercise, going to the doctor or nurse for health screening tests, accessing preventative dental care) had been affected by financial hardship.

High rates of emergency usage by First Nations persons living in Hamilton are likely linked to the problems in accessing non-emergency health care, as revealed by 40% of the population who rated their access to health care as fair or poor and 48% who indicated that wait lists are too long. In addition, as a result of primary healthcare reforms, ~~(47)(45)~~ patients may be told by their primary care providers to go to the emergency department rather than a walk-in clinic when their primary care team is not available. ~~(48)(46)~~ Further examination is required to explore potential bias in hospital admission practices and to differentiate between types of hospitalizations (i.e. mental health, surgical and medical hospitalizations).

There were a number of limitations of the study. Firstly, it should be noted that we may have under sampled the elderly First Nations population living in nursing homes or residences for senior citizens in Hamilton. During our initial seed selection, we did not select any seeds from this population, and this population may have fewer network ties than other population groups, which may have resulted in an under representation of First Nations individuals over 65 years of age. Secondly, RDS cannot guarantee a random sample of network members; ~~(49)(47)~~ therefore, estimates are unbiased to the degree that the assumptions of the RDS estimator are met. There is an active literature on RDS and estimation using RDS data, ~~(50:51)(48:49)~~ and there is debate regarding the true design effects of RDS surveys, ~~(52:53)(50:51)~~ Existing multivariable regression analyses using RDS samples have not appropriately addressed the co-relation between observations and the unequal sampling probabilities inherent in RDS, therefore, we have focused on reporting prevalence estimates for which methods are better established. Despite these limitations, RDS was used to effectively recruit an urban Aboriginal population and allowed for the derivation of rigorous population estimates and data linkages that have previously not been possible.

Given the near absence of population health information for urban Aboriginal people in Canada, this research is able to provide, for the first time, First Nations data that clearly demonstrate alarming socio-economic inequities, a significant burden of chronic disease, multiple barriers in access to health care and elevated emergency room use. This newly established health database represents a significant contribution to public health that will directly inform strategic directions for the improvement of health and social status of urban Aboriginal people in Ontario. For example, this research will support the development of RDS as a tool to effectively recruit a larger cohort for longitudinal research with Aboriginal families in Ontario.

## AKCNOWLEDGEMENTS

Firstly, we would like to thank the First Nations men and women who participated in the Our Health Counts project and so generously shared their time and stories over the

Field Code Changed

1  
2  
3  
4  
5  
6  
7  
8 course of several months. The Our Health Counts project would not have been possible  
9 without the tremendous commitment and enthusiasm of the research staff at De dwa da  
10 dehs ney>s Aboriginal Health Access Centre in Hamilton. This project was funded by  
11 the Ontario Federation of Indian Friendship Centres, the Ministry of Health and Long  
12 Term Care (MOHLTC) Aboriginal Health Transition Fund, and the Centre for Research  
13 on Inner City Health (CRICH) at St. Michael's Hospital. The Institute for Clinical  
14 Evaluative Sciences (ICES) contributed the costs of the in-house ICES data analysis. Dr.  
15 Smylie was supported by a Canadian Institutes for Health Research New Investigator in  
16 Knowledge Translation award during the course of the project.  
17  
18  
19  
20  
21  
22  
23  
24  
25  
26  
27  
28  
29  
30  
31  
32  
33  
34  
35  
36  
37  
38  
39  
40  
41  
42  
43  
44  
45  
46  
47  
48  
49  
50  
51  
52  
53  
54  
55  
56  
57  
58  
59  
60



### Reference List

- (1) Statistics Canada. Aboriginal Peoples in Canada in 2006: Inuit, Métis and First Nations, 2006 Census. Ottawa ON: Ministry of Industry; 2008.
- (2) Canadian Institute for Health Research (CIHR). CIHR Guidelines for Health Research Involving Aboriginal People. Ottawa: CIHR; 20097.
- (3) National Aboriginal Health Organization (NAHO). Ways of Knowing: A Framework for Health Research. National Aboriginal Health Organization; 2003.
- (4) Policy Research Initiative. Not Strangers in these Parts. Urban Aboriginal Peoples. 2003.
- (5) Environics Institute. Urban Aboriginal Peoples Study Main Report. Environics Institute; 2010.
- (6) Peters E., Andersen C. Indigenous in the City: Contemporary Identities and Cultural Innovation. Vancouver: UBC Press; 2013.
- (7) Andersen C. Urban Aboriginality as a Distinctive Identity, in Twelve Parts. In: Peters E., Andersen C., editors. Indigenous in the City: Contemporary Identities and Cultural Innovation. Vancouver: UBC Press; 2013. p. 46.
- (8) Garner R., Carrière G., Sanmartin C., Longitudinal Health and Administrative Data Research Team. The Health of First Nations Living Off-Reserve, Inuit, and Métis Adults in Canada: The Impact of Socio-economic Status on Inequalities in Health. Ottawa: Statistics Canada, Health Analysis Division; 2010. Report No.: 82-622-X.
- (9) Tait H. Aboriginal Peoples Survey, 2006: Inuit Health and Social Conditions. Ottawa, ON: Statistics Canada; 2008.
- (10) Smylie J. Aboriginal infant mortality rate in Canada. Lancet 2012;380(9851):1384.
- (11) Anderson M., Smylie J. Performance measurement systems in Canada: How well do they perform in First Nations, Inuit and Métis Contexts? Pimatisiwin: A Journal of Aboriginal and Indigenous Community Health 2009;7(1):99-115.
- (12) Smylie J., Fell D., Ohlsson A. A Review of Aboriginal Infant Mortality Rates in Canada: Striking and Persistent Aboriginal and Non-Aboriginal Inequities. Canadian Journal of Public Health 2010;101(2):143-8.

Formatted: Space After: 12 pt

Formatted: Font: MyriadPro-Bold, Do not check spelling or grammar

Formatted: Font: MyriadPro-Regular, Do not check spelling or grammar

Formatted: Font: StoneSans, Do not check spelling or grammar

- 1  
2  
3  
4  
5  
6  
7  
8  
9  
10  
11  
12  
13  
14  
15  
16  
17  
18  
19  
20  
21  
22  
23  
24  
25  
26  
27  
28  
29  
30  
31  
32  
33  
34  
35  
36  
37  
38  
39  
40  
41  
42  
43  
44  
45  
46  
47  
48  
49  
50  
51  
52  
53  
54  
55  
56  
57  
58  
59  
60
- (13) [Smylie J., Anderson M. Understanding the health of Indigenous peoples in Canada: key methodologic and conceptual challenges. Canadian Medical Association Journal 2006;165\(6\):602-5.](#)
- (14) [Smylie J., Anderson I., Ratima M., Crengle S., Anderson M. Who is Measuring and Why? Indigenous Health Performance Measurement Systems in Canada, Australia, and New Zealand. The Lancet 2006;367:2029-31.](#)
- (15) [Siggner A.J. The Challenge of Measuring the Demographic and Socio-Economic Conditions of the Urban Aboriginal Population. In: Newhouse D., Peters E., editors. Strangers in these Parts: Urban Aboriginal Peoples. Ottawa: Policy Research Initiative; 2003. p. 119-30.](#)
- (16) [Smylie J., Lofters A., Firestone M., O'Campo P. Population-Based Data and Community Empowerment. In: O'Campo P., Dunn J., editors. Rethinking Social Epidemiology: Towards a Science of Change. Springer Publishing Company; 2011.](#)
- (17) [Graham K.A., Peters E.J. Aboriginal Communities and Urban Sustainability. Ottawa: Canadian Policy Research Networks; 2002.](#)
- (18) [Anderson M., Smylie J., Anderson I., Sinclair R., Crengle S., Ratima M. First Nations, Métis, and Inuit Health Indicators in Canada. A background paper for the project "Action oriented indicators of health and health systems development for Indigenous peoples in Canada, Australia, and New Zealand. Saskatoon: Indigenous Peoples Health Research Centre; 2006.](#)
- (19) [Collier R. Long-form census changes worries health researchers. Canadian Medical Association Journal 2010;182\(12\):E563-E564.](#)
- (20) [Webster P.C. Aboriginal health programming under siege, critics charge. Canadian Medical Association Journal 2012;184\(14\):E739-E740.](#)
- (21) [Heckathorn D. Respondent driven sampling: a new approach to the study of hidden populations. Social Problems 1997;44:174-99.](#)
- (22) [Heckathorn D. Respondent-driven sampling II: Deriving Valid Population Estimates from Chain referral Samples of Hidden Populations. Social Problems 2002;49\(1\):11-34.](#)
- (23) [Heckathorn D, Seeman S, Broadhead R, Hugues J. Extensions of Respondent Driven Sampling: A new approach to the Study of Injection Drug Users aged 18-25. AIDS and Behavior 2002;6\(1\):55-67.](#)
- (24) [Evans-Campbell T., Lindhorst T., Huang B., Walters K.L. Interpersonal Violence in the Lives of Urban American Indian and Alaska Native Women: Implications for Health, Mental Health, and Help-Seeking. American Journal of Public Health 2006;96\(8\):1416-22.](#)

- 1  
2  
3  
4  
5  
6  
7  
8  
9  
10  
11  
12  
13  
14  
15  
16  
17  
18  
19  
20  
21  
22  
23  
24  
25  
26  
27  
28  
29  
30  
31  
32  
33  
34  
35  
36  
37  
38  
39  
40  
41  
42  
43  
44  
45  
46  
47  
48  
49  
50  
51  
52  
53  
54  
55  
56  
57  
58  
59  
60
- (25) [Abdul-Quader A., Heckathorn D, Saidel T. Implementation and Analysis of Respondent Driven Sampling: Lessons from the Field. Journal of Urban Health 2006;83\(7\):1-5.](#)
- (26) [Greenwood M. Children as citizens of First Nations: Linking Indigenous health to early childhood development. Pediatrics and Child Health 2005;10\(9\):553-5.](#)
- (27) [Ermine W. Aboriginal Epistemology. In: Battiste M, Barman J., editors. First Nations Education in Canada: The Circle Unfolds. Vancouver: UBC Press; 1995. p. 101-12.](#)
- (28) [Smylie J., Kaplan-Myrth N., McShane K.E., Métis Nation of Ontario, Pikwakanagan First Nation, Tungasuvvingat Inuit Family Resource Centre. Indigenous Knowledge Translation: Baseline Findings in a Qualitative Study of the Pathways of Health Knowledge in Three Indigenous Communities in Canada. Health Promotion Practice 2009;10\(3\):436-46.](#)
- (29) [Canadian Institute of Health Research, Natural Sciences and Engineering Research Council of Canada, Social Sciences and Humanities Research Council of Canada. Tri-Council Policy Statement: Ethical Conduct for Research Involving Humans. 2010.](#)
- (30) [Canadian Institute for Health Research \(CIHR\). CIHR Guidelines for Health Research Involving Aboriginal People. Ottawa: CIHR; 2007.](#)
- (31) [Ball J., Janyst P. Enacting Research Ethics Partnerships with Indigenous Communities and Canada: "Do it in a Good Way.". Journal of Empirical Research on Human Research Ethics 2008;3\(2\):33-51.](#)
- (32) [First Nations Centre. First Nations Conceptual Frameworks and Applied Models on Ethics, Privacy, and Consent in Health Research and Information. Ottawa: National Aboriginal Health Organization \(NAHO\); 2006.](#)
- (33) [Ontario Federation of Indian Friendship Centres \(OFIFC\). USAI Utility Self-Voicing Access Inter-relationship Reserach Framework. 2012.](#)
- (34) [Statistics Canada. Hamilton, Ontario \(Code3525005\) \(table\). 2006 Community Profiles. 2006 Census. Ottawa ON: Statistics Canada; 2007. Report No.: Catalogue no. 92-591-XWE.](#)
- (35) [Salganik M.J. Variance estimation, design effects, and sample size calculations for respondent-driven sampling. Journal of Urban Health 2006;83\(6 \(Suppl\)\):98-112.](#)
- (36) [Firestone M. Our Health Counts: Unmasking Health and Social Disparities among Urban Aboriginal People in Ontario University of Toronto; 2013.](#)

Formatted: Font: TT1656000, Do not check spelling or grammar

- 1  
2  
3  
4  
5  
6  
7  
8  
9  
10  
11  
12  
13  
14  
15  
16  
17  
18  
19  
20  
21  
22  
23  
24  
25  
26  
27  
28  
29  
30  
31  
32  
33  
34  
35  
36  
37  
38  
39  
40  
41  
42  
43  
44  
45  
46  
47  
48  
49  
50  
51  
52  
53  
54  
55  
56  
57  
58  
59  
60
- (37) IBM® SPSS® Data Collection Author [computer program]. Version 6.0.1. Chicago, IL: SPSS Inc.; 2000.
- (38) Respondent-Driven Sampling Analysis Tool (RDSAT) Version 7.1 [computer program]. Ithaca, New York: Cornell University; 2007.
- (39) Wejnert C. An Empirical Test of Respondent-Driven Sampling: Point Estimates, Variance, Degree Measures, and Out-of-Equilibrium Data. *Sociological Methodology* 2009;39(1):73-116.
- (40) Firestone M., Smylie J, Maracle S., Siedule C., Pigeau L., De dwa da dehs ney>s Aboriginal Health Access Centre, et al. Concept Mapping: Application of a Community-Based Methodology in three Urban Aboriginal Populations. *American Indian Culture and Research Journal*, Under Review 2014;38(4).
- (41) Statistics Canada. Persons per room of private household. <http://www.statcan.gc.ca/concepts/definitions/dwelling-logement-07-eng.html> 2013 Available from: URL: <http://www.statcan.gc.ca/concepts/definitions/dwelling-logement-07-eng.html>
- (42) Statistics Canada no.92-594-XWE. Hamilton, Ontario (Code 3525005) (table). Aboriginal Population Profile. 2006 Census. <http://www12.statcan.ca/census-recensement/2006/dp-pd/prof/92-594/index.cfm?Lang=E> (accessed January 20, 2014) 2007 [cited 11 A.D. Apr 30];
- (43) Health Canada. A Statistical Profile on the Health of First Nations in Canada, for the Year 2000. Ottawa; 2005. Report No.: H35-4/30-2000E-PDF.
- (44) Ontario Federation of Indian Friendship Centres (OFIFC), Ontario Métis Aboriginal Association, Ontario Native Women's Association (ONWA). Urban Aboriginal Task Force Final Report. Toronto ON; 2007.
- (45) McCaskill D., FitzMaurice K., Cidro J. Toronto Aboriginal Research Project (TARP) Final Report. 2011.
- (46) Statistics Canada. Canadian Community Health Survey. Ottawa ON: Statistics Canada; 2007.
- (47) Muldoon L., Rowan M.S., Geneau R., Hogg W., Coulson D. Models of primary care Service delivery in Ontario: Why such diversity? *Healthcare Management Forum* 2006;19(4):18-23.
- (48) Howard M., Goertzen J., Kaczorowski J., Hutchinson B., Morris K., Thabane L., et al. Emergency Department and Walk-in Clinic Use in Models of Primary Care Practice with Different After Hours Accessibility in Ontario. *Health Care Policy* 2008;4(1):73-88.

**Formatted:** Hyperlink, Do not check spelling or grammar

**Formatted:** Underline, Do not check spelling or grammar

- 1  
2  
3  
4  
5  
6  
7  
8  
9  
10  
11  
12  
13  
14  
15  
16  
17  
18  
19  
20  
21  
22  
23  
24  
25  
26  
27  
28  
29  
30  
31  
32  
33  
34  
35  
36  
37  
38  
39  
40  
41  
42  
43  
44  
45  
46  
47  
48  
49  
50  
51  
52  
53  
54  
55  
56  
57  
58  
59  
60
- (49) Heimer R. Critical Issues and Further Questions About Respondent-Driven Sampling: Comment on Ramirez-Valles, *et al.* (2005). *AIDS and Behavior* 2005;9(4):403-8.
- (50) Gile K.J., Handcock M.S. Respondent-Driven Sampling: An Assessment of Current Methodology. *Sociological Methodology* 2010;40(1):285-327.
- (51) Heckathorn D. Extensions of respondent-driven sampling: analyzing continuous variables and controlling for differential recruitment. *Sociological Methodology* 2007;37(1):151-208.
- (52) Goel S., Salganik M.J. Assessing respondent-driven sampling. *Proceedings of the National Academy of Sciences of the United States of America* 2010;107(15):6743-7.
- (53) Wejnert C., Pham H., Krishna N., Le B., DiNenno E. Estimating design effect and calculating sample size for respondent-driven sampling studies of injection drug users in the United States. *AIDS Behavior* 2012;16(4):797-806.

Formatted: Font: Italic, Do not check spelling or grammar

Formatted: Indent: Left: 0", Hanging: 0.5", Line spacing: single, Tab stops: 0.38", Right + 0.5", Left + Not at 0.25"

#### Reference List

- (1) Statistics Canada. Aboriginal Peoples in Canada in 2006: Inuit, Métis and First Nations, 2006 Census. Ottawa ON: Ministry of Industry; 2008.
- (2) Canadian Institute for Health Research (CIHR). CIHR Guidelines for Health Research Involving Aboriginal People. Ottawa: CIHR; 20097.
- (3) National Aboriginal Health Organization (NAHO). Ways of Knowing: A Framework for Health Research. National Aboriginal Health Organization; 2003.
- (4) Policy Research Initiative. Not Strangers in these Parts. Urban Aboriginal Peoples. 2003.
- (5) Environics Institute. Urban Aboriginal Peoples Study Main Report. Environics Institute; 2010.
- (6) Peters E., Andersen C. Indigenous in the City: Contemporary Identities and Cultural Innovation. Vancouver: UBC Press; 2013.
- (7) Andersen C. Urban Aboriginality as a Distinctive Identity, in Twelve Parts. In: Peters E., Andersen C., editors. Indigenous in the City: Contemporary Identities and Cultural Innovation. Vancouver: UBC Press; 2013. p. 46.

- 1  
2  
3  
4  
5  
6  
7  
8  
9  
10  
11  
12  
13  
14  
15  
16  
17  
18  
19  
20  
21  
22  
23  
24  
25  
26  
27  
28  
29  
30  
31  
32  
33  
34  
35  
36  
37  
38  
39  
40  
41  
42  
43  
44  
45  
46  
47  
48  
49  
50  
51  
52  
53  
54  
55  
56  
57  
58  
59  
60
- ~~—(8) Garner R., Carrière G., Sanmartin C., Longitudinal Health and Administrative Data Research Team. The Health of First Nations Living Off-Reserve, Inuit, and Métis Adults in Canada: The Impact of Socio-economic Status on Inequalities in Health. Ottawa: Statistics Canada, Health Analysis Division; 2010. Report No.: 82-622-X.~~
  - ~~—(9) Tait H. Aboriginal Peoples Survey, 2006: Inuit Health and Social Conditions. Ottawa, ON: Statistics Canada; 2008.~~
  - ~~—(10) Smylie J. Aboriginal infant mortality rate in Canada. Lancet 2012;380(9851):1384.~~
  - ~~—(11) Anderson M., Smylie J. Performance measurement systems in Canada: How well do they perform in First Nations, Inuit and Métis Contexts? Pimatisiwin: A Journal of Aboriginal and Indigenous Community Health 2009;7(1):99-115.~~
  - ~~—(12) Smylie J., Fell D., Ohlsson A. A Review of Aboriginal Infant Mortality Rates in Canada: Striking and Persistent Aboriginal and Non-Aboriginal Inequities. Canadian Journal of Public Health 2010;101(2):143-8.~~
  - ~~—(13) Smylie J., Anderson M. Understanding the health of Indigenous peoples in Canada: key methodologic and conceptual challenges. Canadian Medical Association Journal 2006;165(6):602-5.~~
  - ~~—(14) Smylie J., Anderson I., Ratima M., Crengle S., Anderson M. Who is Measuring and Why? Indigenous Health Performance Measurement Systems in Canada, Australia, and New Zealand. The Lancet 2006;367:2029-31.~~
  - ~~—(15) Siggner A.J. The Challenge of Measuring the Demographic and Socio-Economic Conditions of the Urban Aboriginal Population. In: Newhouse D., Peters E., editors. Strangers in these Parts: Urban Aboriginal Peoples. Ottawa: Policy Research Initiative; 2003. p. 119-30.~~
  - ~~—(16) Smylie J., Lofters A., Firestone M., O'Campo P. Population-Based Data and Community Empowerment. In: O'Campo P., Dunn J., editors. Rethinking Social Epidemiology: Towards a Science of Change. Springer Publishing Company; 2011.~~
  - ~~—(17) Graham K.A., Peters E.J. Aboriginal Communities and Urban Sustainability. Ottawa: Canadian Policy Research Networks; 2002.~~
  - ~~—(18) Anderson M., Smylie J., Anderson I., Sinclair R., Crengle S., Ratima M. First Nations, Métis, and Inuit Health Indicators in Canada. A background paper for the project "Action-oriented indicators of health and health systems development for Indigenous peoples in Canada, Australia, and New Zealand. Saskatoon: Indigenous Peoples Health Research Centre; 2006.~~

- 1  
2  
3  
4  
5  
6  
7  
8  
9  
10  
11  
12  
13  
14  
15  
16  
17  
18  
19  
20  
21  
22  
23  
24  
25  
26  
27  
28  
29  
30  
31  
32  
33  
34  
35  
36  
37  
38  
39  
40  
41  
42  
43  
44  
45  
46  
47  
48  
49  
50  
51  
52  
53  
54  
55  
56  
57  
58  
59  
60
- ~~-(19) Collier R. Long form census changes worries health researchers. *Canadian Medical Association Journal* 2010;182(12):E563-E564.~~
  - ~~-(20) Webster P.C. Aboriginal health programming under siege, critics charge. *Canadian Medical Association Journal* 2012;184(14):E739-E740.~~
  - ~~-(21) Heckathorn D. Respondent driven sampling: a new approach to the study of hidden populations. *Social Problems* 1997;44:174-99.~~
  - ~~-(22) Heckathorn D. Respondent driven sampling II: Deriving Valid Population Estimates from Chain referral Samples of Hidden Populations. *Social Problems* 2002;49(1):11-34.~~
  - ~~-(23) Heckathorn D, Seeman S, Broadhead R, Hugues J. Extensions of Respondent Driven Sampling: A new approach to the Study of Injection Drug Users aged 18-25. *AIDS and Behavior* 2002;6(1):55-67.~~
  - ~~-(24) Evans Campbell T., Lindhorts T., Huang B., Walters K.L. Interpersonal Violence in the Lives of Urban American Indian and Alaska Native Women: Implications for Health, Mental Health, and Help Seeking. *American Journal of Public Health* 2006;96(8):1416-22.~~
  - ~~-(25) Abdul Quader A., Heckathorn D, Saidel T. Implementation and Analysis of Respondent Driven Sampling: Lessons from the Field. *Journal of Urban Health* 2006;83(7):1-5.~~
  - ~~-(26) Greenwood M. Children as citizens of First Nations: Linking Indigenous health to early childhood development. *Pediatrics and Child Health* 2005;10(9):553-5.~~
  - ~~-(27) Ermine W. Aboriginal Epistemology. In: Battiste M, Barman J., editors. *First Nations Education in Canada: The Circle Unfolds*. Vancouver: UBC Press; 1995. p. 101-12.~~
  - ~~-(28) Smylie J., Kaplan Myrth N., McShane K.E., Métis Nation of Ontario, Pikwakanagan First Nation, Tungasuvvingat Inuit Family Resource Centre. Indigenous Knowledge Translation: Baseline Findings in a Qualitative Study of the Pathways of Health Knowledge in Three Indigenous Communities in Canada. *Health Promotion Practice* 2009;10(3):436-46.~~
  - ~~-(29) Canadian Institute of Health Research, Natural Sciences and Engineering Research Council of Canada, Social Sciences and Humanities Research Council of Canada. *Tri-Council Policy Statement: Ethical Conduct for Research Involving Humans*. 2010.~~
  - ~~-(30) Canadian Institute for Health Research (CIHR). *CIHR Guidelines for Health Research Involving Aboriginal People*. Ottawa: CIHR; 2007.~~



- 1  
2  
3  
4  
5  
6  
7  
8  
9  
10  
11  
12  
13  
14  
15  
16  
17  
18  
19  
20  
21  
22  
23  
24  
25  
26  
27  
28  
29  
30  
31  
32  
33  
34  
35  
36  
37  
38  
39  
40  
41  
42  
43  
44  
45  
46  
47  
48  
49  
50  
51  
52  
53  
54  
55  
56  
57  
58  
59  
60
- ~~-(31) Ball J., Janyst P. Enacting Research Ethics Partnerships with Indigenous Communities and Canada: "Do it in a Good Way.". *Journal of Empirical Research on Human Research Ethics* 2008;3(2):33-51.~~
  - ~~-(32) First Nations Centre. *First Nations Conceptual Frameworks and Applied Models on Ethics, Privacy, and Consent in Health Research and Information*. Ottawa: National Aboriginal Health Organization (NAHO); 2006.~~
  - ~~-(33) Ontario Federation of Indian Friendship Centres (OFIFC). *USAI Utility Self-Voicing Access Inter-relationship Reserach Framework*. 2012.~~
  - ~~-(34) Statistics Canada. Hamilton, Ontario (Code3525005) (table). 2006 Community Profiles. 2006 Census. Ottawa ON: Statistics Canada; 2007. Report No.: Catalogue no. 92-591-XWE.~~
  - ~~-(35) Salganik M.J. Variance estimation, design effects, and sample size calculations for respondent driven sampling. *Journal of Urban Health* 2006;83(6 (Suppl)):98-112.~~
  - ~~-(36) Firestone M. *Our Health Counts: Unmasking Health and Social Disparities among Urban Aboriginal People in Ontario* University of Toronto; 2013.~~
  - ~~-(37) IBM® SPSS® Data Collection Author [computer program]. Version 6.0.1. Chicago, IL: SPSS Inc.; 2000.~~
  - ~~-(38) Respondent Driven Sampling Analysis Tool (RDSAT) Version 7.1 [computer program]. Ithaca, New York: Cornell University; 2007.~~
  - ~~-(39) Wejnert C. An Empirical Test of Respondent Driven Sampling: Point Estimates, Variance, Degree Measures, and Out of Equilibrium Data. *Sociological Methodology* 2009;39(1):73-116.~~
  - ~~-(40) Statistics Canada. Persons per room of private household. Available from: URL: [http://www.statean.gc.ca/concepts/definitions/dwelling\\_logement-07-eng.html](http://www.statean.gc.ca/concepts/definitions/dwelling_logement-07-eng.html)~~
  - ~~-(41) Statistics Canada no.92-594 XWE. Hamilton, Ontario (Code 3525005) (table). *Aboriginal Population Profile. 2006 Census*. <http://www12.statean.ca/census-recensement/2006/dp-pd/prof/92-594/index-cfm?Lang=E> (accessed January 20, 2014)~~
  - ~~-(42) Health Canada. *A Statistical Profile on the Health of First Nations in Canada, for the Year 2000*. Ottawa; 2005. Report No.: H35-4/30-2000E-PDF.~~
  - ~~-(43) Ontario Federation of Indian Friendship Centres (OFIFC), Ontario Métis Aboriginal Association, Ontario Native Women's Association (ONWA). *Urban Aboriginal Task Force Final Report*. Toronto ON; 2007.~~

- 1  
2  
3  
4  
5  
6  
7  
8  
9  
10  
11  
12  
13  
14  
15  
16  
17  
18  
19  
20  
21  
22  
23  
24  
25  
26  
27  
28  
29  
30  
31  
32  
33  
34  
35  
36  
37  
38  
39  
40  
41  
42  
43  
44  
45  
46  
47  
48  
49  
50  
51  
52  
53  
54  
55  
56  
57  
58  
59  
60
- ~~-(44) McCaskill D., FitzMaurice K., Cidro J. Toronto Aboriginal Research Project (TARP) Final Report. 2011.~~
  - ~~-(45) Statistics Canada. Canadian Community Health Survey. Ottawa ON: Statistics Canada; 2007.~~
  - ~~-(46) Muldoon L., Rowan M.S., Geneau R., Hogg W., Coulson D. Models of primary care Service delivery in Ontario: Why such diversity? Healthcare Management Forum 2006;19(4):18-23.~~
  - ~~-(47) Howard M., Goertzen J., Kaczorowski J., Hutchinson B., Morris K., Thabane L., et al. Emergency Department and Walk-in Clinic Use in Models of Primary Care Practice with Different After Hours Accessibility in Ontario. Health Care Policy 2008;4(1):73-88.~~
  - ~~-(48) Heimer R. Critical Issues and Further Questions About Respondent Driven Sampling: Comment on Ramirez-Valles, et al. (2005). AIDS and Behavior 2005;9(4):403-8.~~
  - ~~-(49) Gile K.J., Handcock M.S. Respondent Driven Sampling: An Assessment of Current Methodology. Sociological Methodology 2010;40(1):285-327.~~
  - ~~-(50) Heckathorn D. Extensions of respondent driven sampling: analyzing continuous variables and controlling for differential recruitment. Sociological Methodology 2007;37(1):151-208.~~
  - ~~-(51) Goel S., Salganik M.J. Assessing respondent driven sampling. Proceedings of the National Academy of Sciences of the United States of America 2010;107(15):6743-7.~~
  - ~~-(52) Wejnert C., Pham H., Krishna N., Le B., DiNenno E. Estimating design effect and calculating sample size for respondent driven sampling studies of injection drug users in the United States. AIDS Behavior 2012;16(4):797-806.~~

**STROBE 2007 (v4) checklist of items to be included in reports of observational studies in epidemiology\***  
**Checklist for cohort, case-control, and cross-sectional studies (combined)**

| Section/Topic             | Item # | Recommendation                                                                                                                                                                                                                                                                                                                                                                                                                                                         | Reported on page # |
|---------------------------|--------|------------------------------------------------------------------------------------------------------------------------------------------------------------------------------------------------------------------------------------------------------------------------------------------------------------------------------------------------------------------------------------------------------------------------------------------------------------------------|--------------------|
| Title and abstract        | 1      | (a) Indicate the study's design with a commonly used term in the title or the abstract                                                                                                                                                                                                                                                                                                                                                                                 | Yes, in title      |
|                           |        | (b) Provide in the abstract an informative and balanced summary of what was done and what was found                                                                                                                                                                                                                                                                                                                                                                    | Yes, pg 2          |
| <b>Introduction</b>       |        |                                                                                                                                                                                                                                                                                                                                                                                                                                                                        |                    |
| Background/rationale      | 2      | Explain the scientific background and rationale for the investigation being reported                                                                                                                                                                                                                                                                                                                                                                                   | Yes, pg 3-4        |
| Objectives                | 3      | State specific objectives, including any pre-specified hypotheses                                                                                                                                                                                                                                                                                                                                                                                                      | Yes, pg 4          |
| <b>Methods</b>            |        |                                                                                                                                                                                                                                                                                                                                                                                                                                                                        |                    |
| Study design              | 4      | Present key elements of study design early in the paper                                                                                                                                                                                                                                                                                                                                                                                                                | Yes, pg 4-5        |
| Setting                   | 5      | Describe the setting, locations, and relevant dates, including periods of recruitment, exposure, follow-up, and data collection                                                                                                                                                                                                                                                                                                                                        | Yes, pg 5          |
| Participants              | 6      | (a) <i>Cohort study</i> —Give the eligibility criteria, and the sources and methods of selection of participants. Describe methods of follow-up<br><i>Case-control study</i> —Give the eligibility criteria, and the sources and methods of case ascertainment and control selection. Give the rationale for the choice of cases and controls<br><i>Cross-sectional study</i> —Give the eligibility criteria, and the sources and methods of selection of participants | Yes, pg 5          |
|                           |        | (b) <i>Cohort study</i> —For matched studies, give matching criteria and number of exposed and unexposed<br><i>Case-control study</i> —For matched studies, give matching criteria and the number of controls per case                                                                                                                                                                                                                                                 |                    |
| Variables                 | 7      | Clearly define all outcomes, exposures, predictors, potential confounders, and effect modifiers. Give diagnostic criteria, if applicable                                                                                                                                                                                                                                                                                                                               |                    |
| Data sources/ measurement | 8*     | For each variable of interest, give sources of data and details of methods of assessment (measurement). Describe comparability of assessment methods if there is more than one group                                                                                                                                                                                                                                                                                   | Yes, pg 5-6        |
| Bias                      | 9      | Describe any efforts to address potential sources of bias                                                                                                                                                                                                                                                                                                                                                                                                              | Yes, pg 4          |
| Study size                | 10     | Explain how the study size was arrived at                                                                                                                                                                                                                                                                                                                                                                                                                              | Yes, pg 5          |
| Quantitative variables    | 11     | Explain how quantitative variables were handled in the analyses. If applicable, describe which groupings were chosen and why                                                                                                                                                                                                                                                                                                                                           | Yes, pg 6          |
| Statistical methods       | 12     | (a) Describe all statistical methods, including those used to control for confounding                                                                                                                                                                                                                                                                                                                                                                                  | Yes pg 6           |
|                           |        | (b) Describe any methods used to examine subgroups and interactions                                                                                                                                                                                                                                                                                                                                                                                                    |                    |
|                           |        | (c) Explain how missing data were addressed                                                                                                                                                                                                                                                                                                                                                                                                                            |                    |
|                           |        | (d) <i>Cohort study</i> —If applicable, explain how loss to follow-up was addressed<br><i>Case-control study</i> —If applicable, explain how matching of cases and controls was addressed                                                                                                                                                                                                                                                                              |                    |

|                          |     |                                                                                                                                                                                                                                                                                                                                                                                                               |               |
|--------------------------|-----|---------------------------------------------------------------------------------------------------------------------------------------------------------------------------------------------------------------------------------------------------------------------------------------------------------------------------------------------------------------------------------------------------------------|---------------|
|                          |     | <i>Cross-sectional study</i> —If applicable, describe analytical methods taking account of sampling strategy                                                                                                                                                                                                                                                                                                  |               |
|                          |     | (e) Describe any sensitivity analyses                                                                                                                                                                                                                                                                                                                                                                         |               |
| <b>Results</b>           |     |                                                                                                                                                                                                                                                                                                                                                                                                               |               |
| Participants             | 13* | (a) Report numbers of individuals at each stage of study—eg numbers potentially eligible, examined for eligibility, confirmed eligible, included in the study, completing follow-up, and analysed<br>(b) Give reasons for non-participation at each stage<br>(c) Consider use of a flow diagram                                                                                                               |               |
| Descriptive data         | 14* | (a) Give characteristics of study participants (eg demographic, clinical, social) and information on exposures and potential confounders<br>(b) Indicate number of participants with missing data for each variable of interest<br>(c) <i>Cohort study</i> —Summarise follow-up time (eg, average and total amount)                                                                                           | Yes, pg 6-7   |
| Outcome data             | 15* | <i>Cohort study</i> —Report numbers of outcome events or summary measures over time<br><i>Case-control study</i> —Report numbers in each exposure category, or summary measures of exposure<br><i>Cross-sectional study</i> —Report numbers of outcome events or summary measures                                                                                                                             |               |
| Main results             | 16  | (a) Give unadjusted estimates and, if applicable, confounder-adjusted estimates and their precision (eg, 95% confidence interval). Make clear which confounders were adjusted for and why they were included<br>(b) Report category boundaries when continuous variables were categorized<br>(c) If relevant, consider translating estimates of relative risk into absolute risk for a meaningful time period |               |
| Other analyses           | 17  | Report other analyses done—eg analyses of subgroups and interactions, and sensitivity analyses                                                                                                                                                                                                                                                                                                                |               |
| <b>Discussion</b>        |     |                                                                                                                                                                                                                                                                                                                                                                                                               |               |
| Key results              | 18  | Summarise key results with reference to study objectives                                                                                                                                                                                                                                                                                                                                                      | Yes, Pg 9-11  |
| Limitations              | 19  | Discuss limitations of the study, taking into account sources of potential bias or imprecision. Discuss both direction and magnitude of any potential bias                                                                                                                                                                                                                                                    | Yes, Pg 11    |
| Interpretation           | 20  | Give a cautious overall interpretation of results considering objectives, limitations, multiplicity of analyses, results from similar studies, and other relevant evidence                                                                                                                                                                                                                                    | Yes, pg 9-11  |
| Generalisability         | 21  | Discuss the generalisability (external validity) of the study results                                                                                                                                                                                                                                                                                                                                         |               |
| <b>Other information</b> |     |                                                                                                                                                                                                                                                                                                                                                                                                               |               |
| Funding                  | 22  | Give the source of funding and the role of the funders for the present study and, if applicable, for the original study on which the present article is based                                                                                                                                                                                                                                                 | Yes, pg 11-12 |

\*Give information separately for cases and controls in case-control studies and, if applicable, for exposed and unexposed groups in cohort and cross-sectional studies.

**Note:** An Explanation and Elaboration article discusses each checklist item and gives methodological background and published examples of transparent reporting. The STROBE checklist is best used in conjunction with this article (freely available on the Web sites of PLoS Medicine at <http://www.plosmedicine.org/>, Annals of Internal Medicine at <http://www.annals.org/>, and Epidemiology at <http://www.epidem.com/>). Information on the STROBE Initiative is available at [www.strobe-statement.org](http://www.strobe-statement.org).

# BMJ Open

## Unmasking Health Determinants and Health Outcomes for Urban First Nations Using Respondent Driven Sampling

|                                 |                                                                                                                                                                                                                                                                                                                                                                       |
|---------------------------------|-----------------------------------------------------------------------------------------------------------------------------------------------------------------------------------------------------------------------------------------------------------------------------------------------------------------------------------------------------------------------|
| Journal:                        | <i>BMJ Open</i>                                                                                                                                                                                                                                                                                                                                                       |
| Manuscript ID:                  | bmjopen-2014-004978.R2                                                                                                                                                                                                                                                                                                                                                |
| Article Type:                   | Research                                                                                                                                                                                                                                                                                                                                                              |
| Date Submitted by the Author:   | 12-Jun-2014                                                                                                                                                                                                                                                                                                                                                           |
| Complete List of Authors:       | Firestone, Michelle; St. Michaels Hospital, Centre for Research on Inner City Health<br>Smylie, Janet; University of Toronto, Dalla Lana School of Public Health<br>Maracle, Sylvia; Ontario Federation of Indian Friendship Centres,<br>Spiller, Michael; Cornell University,<br>O'Campo, Patricia; St. Michael's Hospital, Centre for Research on Inner City Health |
| <b>Primary Subject Heading</b>: | Public health                                                                                                                                                                                                                                                                                                                                                         |
| Secondary Subject Heading:      | Public health, Research methods, Epidemiology                                                                                                                                                                                                                                                                                                                         |
| Keywords:                       | PUBLIC HEALTH, EPIDEMIOLOGY, SOCIAL MEDICINE                                                                                                                                                                                                                                                                                                                          |
|                                 |                                                                                                                                                                                                                                                                                                                                                                       |

SCHOLARONE™  
Manuscripts

1  
2  
3  
4 **Unmasking Health Determinants and Health Outcomes for Urban First Nations**  
5 **Using Respondent Driven Sampling**  
6

7  
8 Firestone M., Smylie J., Maracle S., Spiller M., O'Campo P.  
9

10 **Corresponding Author:**

11 Firestone, Michelle

12 Post-Doctoral Fellow, Centre for Research on Inner City Health (CRICH), St. Michael's  
13 Hospital

14 209 Victoria, 3rd floor

15 Toronto, Ontario Canada M5B 1C6

16 Email: firestonem@smh.ca

17 Phone: 416-864-6060 ext 77437

18 Fax: 416-864-5558  
19  
20  
21

22 Smylie, Janet

23 Research Scientist, Centre for Research on Inner City Health (CRICH)

24 Associate Professor, Department of Public Health Sciences, University of Toronto

25 Toronto, Canada  
26  
27

28 Maracle, Sylvia

29 Executive Director, Ontario Federation of Indian Friendship Centres (OFIFC)

30 Toronto, Canada  
31  
32

33 Spiller, Michael

34 Cornell University, Department of Sociology

35 Ithaca, New York  
36  
37

38 O'Campo, Patricia

39 Director, Centre for Research on Inner City Health

40 Professor, Dalla Lana School of Public Health, University of Toronto

41 Toronto, Canada  
42

43 **Keywords:** Canada; urban Aboriginal health; First Nations; Respondent-Driven  
44 Sampling; Community-based Research  
45

46 **Word Count:** 4,233  
47  
48  
49  
50  
51  
52  
53  
54  
55  
56  
57  
58  
59  
60

## ABSTRACT

**Objective:** Population based health information on urban Aboriginal populations in Canada is limited due to challenges with the identification of Aboriginal persons in existing health datasets. The main objective of the Our Health Counts (OHC) project was to work in partnership with Aboriginal stakeholders to generate a culturally relevant, representative baseline health data set for three urban Aboriginal communities in Ontario, Canada. **Design:** Respondent-Driven Sampling.

**Setting:** Hamilton, Ontario, Canada.

**Participants:** The OHC study, in partnership with De dwa da dehs ney>s Aboriginal Health Access Centre (DAHC) recruited 554 First Nations adults living in Hamilton using RDS.

**Results:** Among First Nations adults living in Hamilton, 78% earned less than \$20,000 per year and 70% lived in the lowest income quartile neighbourhoods. Mobility and crowded living conditions were also highly prevalent. Common chronic diseases included arthritis, hypertension, diabetes and COPD and rates of emergency room access were elevated.

**Conclusions:** RDS is an effective sampling method in urban Aboriginal contexts as it builds upon existing social networks and successfully identified a population-based cohort. The findings illustrate striking disparities in health determinants and health outcomes between urban First Nations individuals and the general population which have important implications for health services delivery, programming and policy development.

## ARTICLE SUMMARY

### Strengths and limitations of this study:

- Our study is the first RDS of self-identified First Nations people residing in an urban setting in Canada
- This study models best practices in academic-Aboriginal community research partnerships
- RDS has been demonstrated to be a promising tool for generating Aboriginal health assessment measures in urban areas where there are limited existing sampling frame options
- At present, multivariable regression analyses using RDS samples have not appropriately addressed the co-relation between observations and the unequal



1  
2  
3  
4  
5  
6  
7  
8  
9  
10  
11  
12  
13  
14  
15  
16  
17  
18  
19  
20  
21  
22  
23  
24  
25  
26  
27  
28  
29  
30  
31  
32  
33  
34  
35  
36  
37  
38  
39  
40  
41  
42  
43  
44  
45  
46  
47  
48  
49  
50  
51  
52  
53  
54  
55  
56  
57  
58  
59  
60

sampling probabilities inherent in RDS; therefore we present prevalence estimates for which methods are better established

For peer review only

## INTRODUCTION

According to the 2006 Census, over 60% (150,570 people) of Aboriginal<sup>a</sup> people living in Ontario live in urban areas.[1] Nearly seven out of ten Métis live in urban areas, and about three out of every four people in the off-reserve First Nations population live in urban areas.[1] First Nations people have historically been dislocated from their original homelands and may constitute diasporic, heterogeneous communities in urban areas.[2] Specifically, an increasing number of First Nations individuals are moving to urban centers to seek better housing, employment and education opportunities and for the services and amenities available.[3-5] There is a growing body of literature exploring the complexities of urban indigeneity [6] and some of the elements which distinguish urban Aboriginal identity are social and economic marginalization, a growing middle class, and population diversity in terms of cultural origins and legal status.[7] According to the Canadian Census, First Nations, Inuit, and Métis populations experience ongoing disparities in social determinants of health such as income insecurity, unemployment, low levels of education, decreased food availability, and inadequate housing compared to non-Aboriginal Canadians, and these disparities are exacerbated with urban residence.[1;8;9]

Despite the growing size of the urban Aboriginal population in Canada, accessible and culturally relevant population health data for this population are almost non-existent.[10-13] While census data do exist, there are serious deficits in population health measures.[13] Some of the reasons behind this deficiency are limitations in the current health information system and data collection processes with respect to Aboriginal peoples.[14;15] Sampling frames are often biased and comprise non-random subpopulations such as lists of members or clients of particular programs and services in the community. When urban Aboriginal people have been included in census-based national surveys, these surveys were underpowered and often First Nations, Inuit, and Métis data could not be successfully disaggregated.[14;16] Additionally, studies based on Census data show that a significant number of Aboriginal people move from rural and reserve areas to cities, and back and forth as well as within and among cities.[4;17] These factors make it difficult to get reliable counts of the Aboriginal population of a city.

---

<sup>a</sup> “Aboriginal people” is a collective name for all of the original peoples of Canada and their descendants. The *Constitution Act* of 1982 specifies that the Aboriginal Peoples in Canada consist of three groups: Indians, Inuit and Métis. The term First Nations came into common use in the 1970s to replace Indian, which some people found offensive. Despite its widespread use, there is no legal definition for this term in Canada. In the United States, the term “Native American” is used to represent Indigenous peoples from North America, including Mexico. For alignment with the US Constitution and to ensure policy implications, the term “American Indian” is still used for Indigenous populations living within US borders, particularly the lower 48 states and parts of Alaska. “Indigenous” is a term used in the international context.

1  
2  
3  
4 At the national level, the continued inability to identify Aboriginal peoples in  
5 healthcare databases leads to very poor coverage of Aboriginal populations in Canada,  
6 with a specific paucity of health information for First Nations, Métis, and Inuit living in  
7 urban areas. Provincial and territorial systems generally do not collect ethnic-specific  
8 utilization data, and their ethnic flags for vital statistics are inconsistent or absent.[18]  
9 The federal government's decision to cancel the long form of the Canadian national  
10 census will further challenge the ability of researchers and communities to identify and  
11 address social inequities across and within populations who experience racialization and  
12 the negative effects of structural discrimination in healthcare and other sectors , thus  
13 widening the existing health and social policy vacuum.[19;20]  
14  
15

16  
17 In the absence of an accessible and accurate population based sampling frame for  
18 urban Aboriginal people, we implemented respondent driven sampling (RDS) for the Our  
19 Health Counts (OHC) study. RDS, like other chain-referral approaches, relies on  
20 members of a population to recruit their peers.[21;22] However, RDS differs from other  
21 methods because of estimation procedures that adjust for the participants' different  
22 probabilities of being sampled.[22] RDS also differs from other chain-referral methods  
23 because the number of recruitments any participant can make is limited, and it employs a  
24 dual incentive structure where participants are rewarded both for participating and for  
25 recruiting their peers.[23]  
26  
27

28  
29 There is limited literature on RDS in Indigenous contexts;[24] however, there is  
30 evidence that links the success of RDS to the strength of social networks and  
31 relationships.[25] Indigenous knowledges are wholistic, relational and embraces a fluidity  
32 that allows for constant growth and change.[26;27] Aboriginal identities tend to value  
33 the group over the individual, thereby establishing models of kinship whereby everyone  
34 has the right to give and receive according their own choices.[26] Therefore, we  
35 hypothesized that RDS would be an appropriate and effective sampling methodology as it  
36 builds on social networks and would draw on existing kinship systems known to be  
37 present in Indigenous communities.[28]  
38  
39

40  
41 The main objective of the OHC project was to work in partnership with  
42 Aboriginal stakeholders to generate a culturally relevant, representative baseline health  
43 data set for three urban Aboriginal communities in Ontario, Canada. The results  
44 presented here pertain specifically to the urban First Nations population in Hamilton  
45 where the organizational project lead was the Ontario Federation of Indian Friendship  
46 Centres (OFIFC) and the community partner was De dwa da dehs ney>s Aboriginal  
47 Health Access Centre (DAHC).  
48

## 49 **METHODS**

### 50 **Community-based participatory research**

51  
52 This study upheld current ethical and scientific standards in Indigenous health  
53 research[29-33] through a community based participatory research partnership between  
54 the academic research team, OFIFC and DAHC. We ensured that our Aboriginal  
55 decision making partners were active in all aspects of the research through the following  
56 mechanisms: Aboriginal leadership; research agreements which explicitly addressed  
57  
58  
59  
60

1  
2  
3 issues of project governance, community expectations, benefits, ownership, control,  
4 access, and possession of information, and dissemination of project results; capacity  
5 building through staffing at community sites, data workshops and awareness building;  
6 respect for the individual and collective rights of Aboriginal peoples with respect to their  
7 health information; cultural relevance through the development and application of  
8 culturally appropriate measures; representation of the urban Aboriginal population of  
9 Ontario; and sustainability of the project to ensure expansion of the database. In addition,  
10 a Governing Council, comprised of representatives from the core partner urban  
11 Aboriginal provincial organizations was established to oversee all stages of the research  
12 process. Specifically, this body adhered to governance protocols and ensured that  
13 individual and collective community rights were respected, were kept informed about the  
14 project's progress and led the project towards meaningful results, acted as a resource to  
15 the community on questions related to various portions of the research project and  
16 controlled the release of all data generated by the study.  
17  
18  
19

20  
21 All members of the study team were from the Aboriginal community, living in the  
22 general vicinity of the city of Hamilton. Formal ethics approval was provided by the  
23 Research Ethics Board of St. Michael's Hospital in Toronto.  
24

### 25 **Study Site**

26  
27 The City of Hamilton is located in southern Ontario on what was traditionally  
28 Haudenosaunee (Iroquian) territory and is near two First Nations reserves: Six Nations of  
29 the Grand River and Mississaugas of the New Credit. According to the 2006 Census, the  
30 total Aboriginal population in Hamilton was 13,735 people, comprising 2.8% of the total  
31 population of the city.[34] The OFIFC identified the city of Hamilton as a promising  
32 community site based on its significant Aboriginal population and strong infrastructure of  
33 Aboriginal community services.  
34  
35

### 36 **Recruitment**

37  
38 The RDS process was initiated through the purposive selection of individuals to begin  
39 recruitment, also called "seeds." Inclusion criteria for participation in the study included  
40 18 years of age, residence within the geographic boundaries of the City of Hamilton and  
41 self-identified as having First Nations identity. First Nations identity was determined  
42 through open dialogue around family, experiences, and location while also explaining the  
43 overall study goals and additional study sites in Ottawa. Questions such as: "What words  
44 best describe you?" and "How do you see yourself?" were useful. With the help of  
45 community partners, six seeds were identified and agreed to participate. In order for  
46 seeds to reflect a diverse demographic of First Nations people living in Hamilton, factors  
47 such as gender, age, family size, and occupations were considered in their selection. For  
48 example, seeds were identified in the student population, among the steel workers union,  
49 among artists, elders, housing and social assistance providers as well as members of local  
50 Aboriginal organizations and boards. Five of the six seeds produced referrals within the  
51 two weeks leading up to the December 2009 holiday closure at DAHC. In February and  
52 March 2010, three additional seeds were added.  
53  
54  
55  
56  
57  
58  
59  
60

1  
2  
3 Study participants, including seeds, provided informed consent and then  
4 completed a health assessment survey after which they received 3-5 coded coupons to  
5 refer a member of their social network into the study. Following the holiday closure of  
6 DAHC, the number of distributed coupons per recruit was increased from 3 to 5 in order  
7 to increase the rate of recruitment. Participants received a monetary reimbursement of  
8 \$20 for their time and participation. They also received an additional \$10 for every  
9 eligible person they recruited into the study. Study recruitment and interviews took place  
10 in an Aboriginal community centre.  
11  
12

13  
14 For sample size calculation, we assumed 95% confidence intervals (CI), survey  
15 item prevalence ranges from 10% to 75% and a design effect of 2.[35] Based on this  
16 formula, the OCH study aimed to recruit 500 First Nations adults and 250 children.  
17

### 18 Sources of Data

19  
20 Community concept mapping was implemented to develop a community specific survey  
21 for First Nations in Hamilton, [36] which was comprised of 8 domains covering areas  
22 such as sociodemographics, physical, mental, and emotional health, First Nations identity  
23 and impacts of colonization (i.e. questions about Residential School attendance,  
24 involvement of child protection agencies, dislocation from traditional lands and  
25 discrimination), and access and barriers to care. The survey tool was piloted with First  
26 Nations community members, and minor modifications were made to improve face  
27 validity. Data were collected and compiled by computer-assisted personal interviewing  
28 with a computer based version of the survey tool developed by the research team using  
29 SPSS Data Collection Author and Collector.[37]  
30  
31  
32

33  
34 Upon completion of recruitment and survey, our sample of First Nations adults  
35 was linked to data holdings at the Institute of Clinical Evaluative Sciences (ICES)  
36 including provincial records of emergency room and hospital visits (Canadian Institutes  
37 of Health Information – Discharge Abstract Database and National Ambulatory Care  
38 Reporting System: Emergency), and neighbourhood income quintiles (derived from  
39 Census data). Using health care system identification numbers (i.e. Ontario Health Card)  
40 provided by participants, we successfully linked 92% (N=725) of First Nations adults to  
41 the ICES database.  
42  
43

### 44 Analysis

45  
46 Recruitment dynamics, adjusted population based estimates and confidence intervals  
47 were calculated using the RDS-I enhanced data smoothing estimator in the custom  
48 RDSAT software (version 7.1).[38] The RDS methodology anticipates that personal  
49 networks are not randomly distributed, and therefore adjusts for small to moderate levels  
50 of network clustering (people who have ties to others like them), in the form of post-  
51 sampling weights.  
52  
53

## 54 RESULTS

Among First Nations adults in Hamilton, 78.9% of participants were recruited via referral trees originating from two seeds. With 19 and 32 waves respectively, the lengths of both of these recruitment chains were long enough to overcome the original sampling bias, which usually happens after 6 or 7 waves of recruitment.[39] The statistical theory is that if the chain-referral process consists of enough waves or cycles of recruitment, the composition of the final sample with respect to key characteristics and behaviors will become independent of the seeds from which it began. The point at which the sample composition becomes stable is termed “equilibrium” and is an indication that RDS has been implemented successfully.[21]

Over a period of four and a half months (November 2009 to March 2010) a total of 790 persons were recruited, including 554 adults and 236 children. Overall, a high response rate for survey questions was observed. Specifically, non-response rates ranged from 2.5% to less than 0.5%, including sensitive questions around income, food security, and impacts of colonization, which had non-response rates under 2%. Such high response rates can be attributed to the survey tool itself, which reflected the health priorities of the community[40] and which was administered in a safe and culturally secure context. Demographic and social characteristics are presented in Table 1.

**Table 1. Demographic and social characteristics of First Nations adults (Total N=554)**

| Characteristic                                                                  | Prevalence % (95% CI) |
|---------------------------------------------------------------------------------|-----------------------|
| <b>Sex</b>                                                                      |                       |
| Male                                                                            | 59.9 (53.3, 67.2)     |
| <b>Age</b>                                                                      |                       |
| 18-34                                                                           | 40.2 (33.3, 48)       |
| 35-49                                                                           | 35.4 (28.7, 41.6)     |
| 50+                                                                             | 24.4 (18.4, 30.8)     |
| <b>Education</b>                                                                |                       |
| Some high school or less                                                        | 57.3 (51.1, 64)       |
| Completed high school                                                           | 19.5 (14.5, 24.7)     |
| Some or completed college                                                       | 18.3 (13.3, 23.3)     |
| Some or completed University                                                    | 5 (2.4, 8)            |
| <b>Income sources for household</b>                                             |                       |
| Provincial or municipal social assistance or welfare (e.g. ODSP, Ontario Works) | 69.2 (63.1, 75)       |
| Wages and salaries                                                              | 28.2 (22.1, 34.2)     |
| Child Tax Benefit                                                               | 17 (12.4, 21.8)       |
| Any other income support                                                        | 13.3 (9.2, 17.6)      |
| Employment insurance                                                            | 9.6 (5.4, 14.3)       |
| Income from self-employment                                                     | 7.7 (4.3, 11.7)       |
| Child Support payments                                                          | 3 (1.1, 4.6)          |
| <b>Individual annual income</b>                                                 |                       |
| \$0-4,999                                                                       | 18.3 (13.4, 24.8)     |
| \$5,000-5,999                                                                   | 23.1 (17.1, 28.5)     |



|                                                                               |                   |
|-------------------------------------------------------------------------------|-------------------|
| \$10,000-14,999                                                               | 21.9 (16.3, 27.6) |
| \$15,000-19,999                                                               | 14.8 (10.7, 20)   |
| \$20,000+                                                                     | 21.8 (16, 27.6)   |
| <b>Mobility</b>                                                               |                   |
| No moves in past 5 years                                                      | 10.2 (6.2, 14.8)  |
| 1 move in past 5 years                                                        | 15.5 (10.5, 20.6) |
| 2 moves in past 5 years                                                       | 20.2 (15.4, 26.4) |
| 3-5 moves in past 5 years                                                     | 41.1 (35, 48.6)   |
| 6-10 moves in past 5 years                                                    | 10.4 (5.7, 13.4)  |
| <b>Overcrowding*</b>                                                          |                   |
| <=1 persons per room                                                          | 27.7 (21.6, 33.8) |
| 1-2 persons per room                                                          | 46 (40.5, 54.3)   |
| >2 persons per room                                                           | 26.3 (19.7, 30.8) |
| <b>Food security</b>                                                          |                   |
| You and others always had enough of the kinds of food you wanted to eat       | 26.7 (21.1, 32.8) |
| You and others had enough to eat, but not always the kinds of food you wanted | 51.5 (45.3, 58)   |
| Sometimes or often you did not have enough to eat**                           | 21.8 (16.5, 27)   |

Note. CI = confidence interval.

\*Following Statistics Canada standards: calculated by dividing the number of rooms in each household (excluding the bathroom) by the number of people residing in the home, where a higher value of 'persons per room' indicates a higher level of crowding[41]

\*\* Collapsed sometimes and often you did not have enough food to eat

The data presented in Table 2 for age, gender and income quintiles compare the OHC population estimates with the total Hamilton population and a random subset of 10% of the Ontario provincial population. The three populations were very similar with respect to the gender breakdown, however, the OHC sample was younger than the general Hamilton and Ontario populations which is consistent with Census data.[42] Over 70% of the First Nations population fell into the lowest income quartile compared to 25% of the general Hamilton population and 20% of the Ontario population. At the higher end of the income scale, we observed that while 15% of Hamilton residents and 20% of the Ontario population fell into the highest income quartile, only 3% of the study population was earning in this category.

**Table 2. Gender, Age and Income Quintile for First Nations Adults, City of Hamilton and Ontario-10%**

| Variable | Sample                   |                           |                                  |                                       |
|----------|--------------------------|---------------------------|----------------------------------|---------------------------------------|
|          | OHC<br>(Total<br>N=725*) | OHC-RDS-<br>Adjusted      | Hamilton<br>(Total<br>N=536,253) | Ontario-10%<br>(Total<br>N=1,324,241) |
|          | Prevalence,<br>%         | Prevalence, %<br>(95% CI) | Prevalence,<br>%                 | Prevalence,<br>%                      |



|                 |       |                   |      |      |
|-----------------|-------|-------------------|------|------|
| Sex             |       |                   |      |      |
| Female          | 49.4  | 37.6 (29.6, 43.6) | 50.9 | 51.2 |
| Male            | 50.6  | 62.4 (56.4, 70.4) | 49.1 | 48.7 |
| Age**           |       |                   |      |      |
| 18-34           | 37.4  | 41.9 (34.4, 49.9) | 28.2 | 28.2 |
| 35-49           | 37.6  | 36.6 (29.9, 43.1) | 28.1 | 29.5 |
| 50-64           | 22.9  | 20.7 (14.7, 26.9) | 24.8 | 24.8 |
| 65+             | 2.1   | 0.8 (0.3, 1.6)    | 18.9 | 17.6 |
| Income Quintile |       |                   |      |      |
| 1-Low           | 71.76 | 73 (66.5, 79.2)   | 25.1 | 19.5 |
| 2               | 16.22 | 11.8 (7.7, 16)    | 22.8 | 19.8 |
| 3               | 6.3   | 7.4 (3.6, 10.5)   | 20.3 | 19.8 |
| 4               | 2.48  | 4.9 (2.5, 9.8)    | 17   | 20.4 |
| 5-High          | 1.34  | 3 (1.1, 5.4)      | 14.7 | 20.2 |

Note. CI = confidence interval; OHC = Our Health Counts; RDS = Respondent Driven Sampling.

\*Total N reflects number of participants linked to ICES database

\*\*Age of participants on 2010-04-01

The most common self-reported chronic conditions that had been diagnosed by a health care provider among First Nations adults (n=554) in Hamilton included arthritis (30.7%; 95% CI 25.4-36.8), hypertension (25.8%; 95% CI 20.3-31.6), asthma (19%; 95% CI 14.9-24.6), diabetes (15.6%; 95% CI 11.2-21.1), heart disease (8.4%; 95% CI 4.8-12.5) and COPD (8.4%; 95% CI 5.3-11.8). The prevalence of self-reported Hepatitis C was 8.7% (95% CI 4.3-11.7). 25% reported having been injured over the past 12 months. Self-reported upper respiratory tract infection (URTI) was common, with 73% (95% CI 67.9-79.9) of adults reporting URTI in the past 12 months.

Among First Nations adults (n=554), 16.7% (95% CI 11.4 – 22.1) felt that availability of health services in their community was excellent, 43.3% (95% CI 36.1 - 49.6) felt it was good, 28.9% (95% CI 23.3 – 35.2) felt it was fair and 11.1% (95% CI 7.9 – 15.6) felt availability was poor. The fact that 40% of the population felt their level of access to health care was fair or poor, despite the geographic proximity to extensive health and social services that the City of Hamilton provides, substantiates the idea that just because the services are geographically proximate, does not mean that they are accessible to First Nations people. Close to half (47.9%) of the First Nations living in Hamilton reported that long waiting lists to see a specialist were a barrier (95% CI 41.9 - 55.4). Other common barriers included: not being able to arrange transportation; doctor not available; not being able to afford direct costs and/or transportation; services not covered by Non-Insured Health Benefits and lack of trust in health care provider.

Both acute and non-acute emergency room visits were much more frequent among First Nations in Hamilton compared to the general Hamilton and Ontario populations. According to data linkages with ICES, a striking 10.6% of the First Nations adult population in Hamilton made 6 or more emergency room visits in the previous 2

years compared to 1.6% and 1.9% of the Hamilton and Ontario adult populations respectively (Table 3).

**Table 3. Number of Emergency Room visits in the Previous 2 Years for Adults (18-64 years), First Nations, City of Hamilton and Ontario-10%**

| Frequency of ER visits       | Sample             |                        |                            |                               |
|------------------------------|--------------------|------------------------|----------------------------|-------------------------------|
|                              | OHC (Total N=514*) | OHC RDS-Adjusted       | Hamilton (Total N=360,378) | Ontario-10% (Total N=901,509) |
|                              | Prevalence, %      | Prevalence, % (95% CI) | Prevalence, %              | Prevalence, %                 |
| None                         | 31.5               | (25.8 – 37.5)          | 66.3                       | 69.1                          |
| 1                            | 26.2               | (20.7 – 32.8)          | 18.7                       | 16.8                          |
| 2-5                          | 31.7               | (25.9 – 37.8)          | 13.4                       | 12.3                          |
| 6+                           | 10.6               | (6.2 – 14.5)           | 1.6                        | 1.9                           |
| <b>ER visits (acute)</b>     |                    |                        |                            |                               |
| None                         | 50.2               | (43.9 – 57.5)          | 78.4                       | 80.1                          |
| 1                            | 24.7               | (18.7 – 30.1)          | 14.2                       | 13.1                          |
| 2-5                          | 20.7               | (15.3 – 26.1)          | 6.8                        | 6.3                           |
| 6+                           | 4                  | 1.6 – 6.9)             | 0.6                        | 0.6                           |
| <b>ER visits (non-acute)</b> |                    |                        |                            |                               |
| None                         | 54.3               | (47.6 – 61.2)          | 79.4                       | 81.2                          |
| 1                            | 22.4               | (17.3 – 28.5)          | 14                         | 12.2                          |
| 2-5                          | 20.4               | (14.5 – 25.4)          | 6.3                        | 6                             |
| 6+                           | 2.9                | (1 – 5.6)              | 0.4                        | 0.6                           |

Note. CI= confidence interval; OHC = Our Health Counts; RDS = Respondent Driven Sampling

\*Total N reflects number of adults aged 28-64 linked to ICES database

Based on ICES data linkages, rates of hospitalization were slightly higher among the First Nations population compared to the Hamilton and Ontario populations. This may partly be explained by a higher birth rate among First Nations populations compared to the general Canadian population,[43] which is reflected by higher rates of obstetrics hospitalization compared to the general Hamilton and Ontario population: 7.3% (95% CI, 3.9 – 10.9) of the Hamilton First Nations population between the ages of 18 and 64 years had been hospitalized at least once in the past 5 years for obstetrical reasons compared to 4% of both the general Hamilton and Ontario populations in the same age group and over the same time period. However, given the high rates of chronic diseases such as diabetes and heart disease and the much higher rates of emergency room use among the First Nations population, these findings were unexpected and therefore require further investigation.

## DISCUSSION

1  
2  
3 The OHC project generated a representative, urban Aboriginal health database. Through  
4 the successful application of RDS, a sample of urban First Nations individuals who might  
5 otherwise not have participated in mainstream surveys or the census was captured. In  
6 addition, given the current deficiency in public health information on urban First Nations  
7 populations, the statistically rigorous RDS sample allowed us to produce population-  
8 based estimates that can be utilized by local, regional, provincial and federal policy  
9 makers as well as urban Aboriginal stakeholders to address social inequities and health  
10 disparities facing this community.  
11  
12

13  
14 Striking levels of poverty were identified in this study. The income data  
15 presented here may be a more representative income profile of the First Nations  
16 population in Hamilton than the 2006 Census. Specifically, the OHC data were adjusted  
17 for the sampling procedure using an RDS estimator and captured more 'hidden'  
18 populations such as persons who are homeless, transient or who have low literacy skills,  
19 who are known to be under-represented in the Census.[11;13] Further evidence of low  
20 incomes among this population is provided by the RDS-adjusted ICES income quintile  
21 data, which revealed that over 70% of the OHC cohort was in the lowest income quartile  
22 compared to 25% of the general Hamilton population and 20% of the Ontario population.  
23  
24

25  
26 Accompanying high levels of poverty, housing and food insecurity were also  
27 highly prevalent among First Nations persons living Hamilton. Over half of the study  
28 population had moved at least 3 times in the past 5 years compared to 60% of the general  
29 Hamilton population who had not moved at all for the past 5 years.[34] Compared to an  
30 overcrowding rate of 3% for the general Canadian population in the 2006 Census,[1] 74%  
31 of First Nations persons in Hamilton live in crowded conditions. These findings echo  
32 those presented in the 2007 Urban Aboriginal Task Force (UATF) final report, which  
33 documented persistent obstacles with finding affordable housing, obtaining stable and  
34 secure employment and accessing appropriate services and resources among urban  
35 Aboriginal people.[44] Similarly, the Toronto Aboriginal Research Project (TARP)  
36 found that Aboriginal people in Toronto tend to concentrate in lower-income  
37 neighbourhoods where a significant proportion, particularly men, live in poverty.[45]  
38 Similar experiences have been reported in other urban jurisdictions across  
39 Canada.[46;47] While a growing proportion of urban Aboriginal people in Canada are  
40 achieving varying degrees of economic success in a number of occupations,[5;45] there  
41 remains a significant amount of unmet basic needs among this population.  
42  
43  
44

45  
46 The burden of chronic conditions experienced by First Nations adults in Hamilton  
47 is disproportionately high. For example, 19% of the OHC Hamilton population reported  
48 having been told by a health care provider that they have asthma, which is more than  
49 twice the self-reported asthma rate (9.3%) for the overall Hamilton population in the  
50 2007 Canadian Community Health Survey (CCHS).[48] Likewise, rates of arthritis and  
51 high blood pressure were 30.7% and 25.8% among First Nations adults in Hamilton  
52 compared to 19.9% and 19.7% among all adults in Hamilton as reported in the 2007  
53 CCHS.[48] For First Nations adults in Hamilton, the rate of diabetes diagnosed by a  
54 health care provider was approximately three times the rate among the general Hamilton  
55 population.[48] These findings are particularly disconcerting given the much younger  
56 age demographic of the First Nations Hamilton population and the documented barriers  
57  
58  
59  
60

1  
2  
3 to receiving health care services including long wait lists, challenges with accessing and  
4 affording transportation and the unavailability of primary care providers including  
5 physicians, nurses, and other healthcare providers in the area. Furthermore, 45.8% (95%  
6 CI 38.9-52.4) of First Nations adults believed that their ability to engage in preventative  
7 health activities (i.e. regular exercise, going to the doctor or nurse for health screening  
8 tests, accessing preventative dental care) had been affected by financial hardship.  
9  
10

11 High rates of emergency usage by First Nations persons living in Hamilton are  
12 likely linked to the problems in accessing non-emergency health care, as revealed by 40%  
13 of the population who rated their access to health care as fair or poor and 48% who  
14 indicated that wait lists are too long. In addition, as a result of primary healthcare  
15 reforms,[49] patients may be told by their primary care providers to go to the emergency  
16 department rather than a walk-in clinic when their primary care team is not available.[50]  
17 High rates of emergency room visits may also reflect a perceived lack of access to  
18 community-based or primary care settings and the extent to which high proportions of  
19 First Nations people continue to be dismissed or disregarded when attempting to access  
20 healthcare, despite geographic proximity. [51-53]Further examination is required to  
21 explore potential bias in hospital admission practices and to differentiate between types  
22 of hospitalizations (i.e. mental health, surgical and medical hospitalizations).  
23  
24  
25  
26

27 There were a number of limitations of the study. Firstly, it should be noted that  
28 we may have under sampled the elderly First Nations population living in nursing  
29 homes or residences for senior citizens in Hamilton. During our initial seed selection,  
30 we did not select any seeds from this population, and this population may have fewer  
31 network ties than other population groups, which may have resulted in an under  
32 representation of First Nations individuals over 65 years of age. Secondly, RDS  
33 cannot guarantee a random sample of network members;[54] therefore, estimates are  
34 unbiased to the degree that the assumptions of the RDS estimator are met. There is an  
35 active literature on RDS and estimation using RDS data,[55;56] and there is debate  
36 regarding the true design effects of RDS surveys.[57;58] Existing multivariable  
37 regression analyses using RDS samples have not appropriately addressed the co-  
38 relation between observations and the unequal sampling probabilities inherent in RDS,  
39 therefore, we have focused on reporting prevalence estimates for which methods are  
40 better established. Despite these limitations, RDS was used to effectively recruit an  
41 urban Aboriginal population and allowed for the derivation of rigorous population  
42 estimates and data linkages that have previously not been possible.  
43  
44  
45  
46

47 Given the near absence of population health information for urban Aboriginal  
48 people in Canada, this research is able to provide, for the first time, First Nations data  
49 that clearly demonstrate alarming socio-economic inequities, a significant burden of  
50 chronic disease, multiple barriers in access to health care and elevated emergency room  
51 use. This newly established health database represents a significant contribution to  
52 public health that will directly inform strategic directions for the improvement of health  
53 and social status of urban Aboriginal people in Ontario. For example, this research will  
54 support the development of RDS as a tool to effectively recruit a larger cohort for  
55 longitudinal research with Aboriginal families in Ontario.  
56  
57  
58  
59  
60

## ACKNOWLEDGEMENTS

1  
2  
3  
4  
5  
6  
7  
8  
9  
10  
11  
12  
13  
14  
15  
16  
17  
18  
19  
20  
21  
22  
23  
24  
25  
26  
27  
28  
29  
30  
31  
32  
33  
34  
35  
36  
37  
38  
39  
40  
41  
42  
43  
44  
45  
46  
47  
48  
49  
50  
51  
52  
53  
54  
55  
56  
57  
58  
59  
60

Firstly, we would like to thank the First Nations men and women who participated in the Our Health Counts project and so generously shared their time and stories over the course of several months. The Our Health Counts project would not have been possible without the tremendous commitment and enthusiasm of the research staff at De dwa da dehs ney>s Aboriginal Health Access Centre in Hamilton. This project was funded by the Ontario Federation of Indian Friendship Centres (OFIFC), the Ministry of Health and Long Term Care (MOHLTC) Aboriginal Health Transition Fund, and the Centre for Research on Inner City Health (CRICH) at St. Michael's Hospital. The Institute for Clinical Evaluative Sciences (ICES) contributed the costs of the in-house ICES data analysis. Dr. Smylie was supported by a Canadian Institutes for Health Research New Investigator in Knowledge Translation award during the course of the project.

**Contributorship statement:** MF contributed substantially to the study conception and design, co-led data interpretation and analysis and drafted multiple versions of the manuscript. JS co-led the study conception and design, data analysis and interpretation and made important contributions to the draft and final manuscript. SM contributed substantially to study conception and design, was a member of the governing council that guided each stage of research, represented the Aboriginal organizational lead of the research and made important revisions to the draft manuscript. MS provided important technical support during data collection, co-led the data analysis and interpretation, and provided important revisions to the manuscript. PO contributed substantially to the study conception and design, analysis and interpretation of data and made important revisions to the draft manuscript.

**Competing interests:** There are no competing interests.

**Funding:** This project was funded by the Ontario Federation of Indian Friendship Centres (OFIFC), the Ministry of Health and Long Term Care (MOHLTC) Aboriginal Health Transition Fund, and the Centre for Research on Inner City Health (CRICH) at St. Michael's Hospital.

**Data sharing:** No additional data are available.

## Reference List

- 1  
2  
3  
4  
5  
6  
7  
8  
9  
10 [1] Statistics Canada. Aboriginal Peoples in Canada in 2006: Inuit, Métis and First  
11 Nations, 2006 Census. Ottawa ON: Ministry of Industry; 2008.  
12  
13 [2] Canadian Institute for Health Research (CIHR). CIHR Guidelines for Health  
14 Research Involving Aboriginal People. Ottawa: CIHR; 20097.  
15  
16 [3] National Aboriginal Health Organization (NAHO). Ways of Knowing: A  
17 Framework for Health Research. National Aboriginal Health Organization; 2003.  
18  
19 [4] Policy Research Initiative. Not Strangers in these Parts. Urban Aboriginal  
20 Peoples. 2003.  
21  
22 [5] Environics Institute. Urban Aboriginal Peoples Study Main Report. Environics  
23 Institute; 2010.  
24  
25 [6] Peters E., Andersen C. Indigenous in the City: Contemporary Identities and  
26 Cultural Innovation. Vancouver: UBC Press, 2013.  
27  
28 [7] Andersen C. Urban Aboriginality as a Distinctive Identity, in Twelve Parts. In:  
29 Peters E., Andersen C., editors. Indigenous in the City: Contemporary Identities  
30 and Cultural Innovation. Vancouver: UBC Press, 2013. 46.  
31  
32 [8] Garner R., Carrière G., Sanmartin C., Longitudinal Health and Administrative  
33 Data Research Team. The Health of First Nations Living Off -Reserve, Inuit, and  
34 Métis Adults in Canada: The Impact of Socio-economic Status on Inequalities in  
35 Health. Ottawa: Statistics Canada, Health Analysis Division; 2010. Report No.:  
36 82-622-X.  
37  
38 [9] Tait H. Aboriginal Peoples Survey, 2006: Inuit Health and Social Conditions.  
39 Ottawa, ON: Statistics Canada; 2008.  
40  
41 [10] Smylie J. Aboriginal infant mortality rate in Canada. Lancet  
42 2012;380(9851):1384.  
43  
44 [11] Anderson M., Smylie J. Performance measurement systems in Canada: How well  
45 do they perform in First Nations, Inuit and Métis Contexts? Pimatisiwin: A  
46 Journal of Aboriginal and Indigenous Community Health 2009;7(1):99-115.  
47  
48 [12] Smylie J., Fell D., Ohlsson A. A Review of Aboriginal Infant Mortality Rates in  
49 Canada: Striking and Persistent Aboriginal and Non-Aboriginal Inequities.  
50 Canadian Journal of Public Health 2010;101(2):143-148.  
51  
52  
53  
54  
55  
56  
57  
58  
59  
60



- 1  
2  
3  
4  
5  
6  
7  
8  
9  
10  
11  
12  
13  
14  
15  
16  
17  
18  
19  
20  
21  
22  
23  
24  
25  
26  
27  
28  
29  
30  
31  
32  
33  
34  
35  
36  
37  
38  
39  
40  
41  
42  
43  
44  
45  
46  
47  
48  
49  
50  
51  
52  
53  
54  
55  
56  
57  
58  
59  
60
- [13] Smylie J., Anderson M. Understanding the health of Indigenous peoples in Canada: key methodologic and conceptual challenges. *Canadian Medical Association Journal* 2006;165(6):602-605.
  - [14] Smylie J., Anderson I., Ratima M., et al. Who is Measuring and Why? Indigenous Health Performance Measurement Systems in Canada, Australia, and New Zealand. *The Lancet* 2006;367:2029-2031.
  - [15] Siggner A.J. The Challenge of Measuring the Demographic and Socio-Economic Conditions of the Urban Aboriginal Population. In: Newhouse D., Peters E., editors. *Strangers in these Parts: Urban Aboriginal Peoples*. Ottawa: Policy Research Initiative, 2003. 119-130.
  - [16] Smylie J., Lofters A., Firestone M., et al. Population-Based Data and Community Empowerment. In: O'Campo P., Dunn J., editors. *Rethinking Social Epidemiology: Towards a Science of Change*. Springer Publishing Company, 2011.
  - [17] Graham K.A., Peters E.J. *Aboriginal Communities and Urban Sustainability*. Ottawa: Canadian Policy Research Networks; 2002.
  - [18] Anderson M., Smylie J., Anderson I., et al. First Nations, Métis, and Inuit Health Indicators in Canada. A background paper for the project "Action oriented indicators of health and health systems development for Indigenous peoples in Canada, Australia, and New Zealand. Saskatoon: Indigenous Peoples Health Research Centre; 2006.
  - [19] Collier R. Long-form census changes worries health researchers. *Canadian Medical Association Journal* 2010;182(12):E563-E564.
  - [20] Webster P.C. Aboriginal health programming under siege, critics charge. *Canadian Medical Association Journal* 2012;184(14):E739-E740.
  - [21] Heckathorn D. Respondent driven sampling: a new approach to the study of hidden populations. *Social Problems* 1997;44:174-199.
  - [22] Heckathorn D. Respondent-driven sampling II: Deriving Valid Population Estimates from Chain referral Samples of Hidden Populations. *Social Problems* 2002;49(1):11-34.
  - [23] Heckathorn D, Seeman S, Broadhead R, et al. Extensions of Respondent Driven Sampling: A new approach to the Study of Injection Drug Users aged 18-25. *AIDS and Behavior* 2002;6(1):55-67.
  - [24] Evans-Campbell T., Lindhorts T., Huang B., et al. Interpersonal Violence in the Lives of Urban American Indian and Alaska Native Women: Implications for Health, Mental Health, and Help-Seeking. *American Journal of Public Health* 2006;96(8):1416-1422.



- 1  
2  
3 [25] Abdul-Quader A., Heckathorn D, Saidel T. Implementation and Analysis of  
4 Respondent Driven Sampling: Lessons from the Field. *Journal of Urban Health*  
5 2006;83(7):1-5.  
6  
7  
8 [26] Greenwood M. Children as citizens of First Nations: Linking Indigenous health to  
9 early childhood development. *Pediatrics and Child Health* 2005;10(9):553-555.  
10  
11 [27] Ermine W. Aboriginal Epistemology. In: Battiste M, Barman J., editors. *First*  
12 *Nations Education in Canada: The Circle Unfolds*. Vancouver: UBC Press, 1995.  
13 101-112.  
14  
15 [28] Smylie J., Kaplan-Myrth N., McShane K.E., et al. Indigenous Knowledge  
16 Translation: Baseline Findings in a Qualitative Study of the Pathways of Health  
17 Knowledge in Three Indigenous Communities in Canada. *Health Promotion*  
18 *Practice* 2009;10(3):436-446.  
19  
20 [29] Canadian Institute of Health Research, Natural Sciences and Engineering  
21 Research Council of Canada, Social Sciences and Humanities Research Council  
22 of Canada. *Tri-Council Policy Statement: Ethical Conduct for Research Involving*  
23 *Humans*. 2010.  
24  
25 [30] Canadian Institute for Health Research (CIHR). *CIHR Guidelines for Health*  
26 *Research Involving Aboriginal People*. Ottawa: CIHR; 2007.  
27  
28 [31] Ball J., Janyst P. Enacting Research Ethics Partnerships with Indigenous  
29 Communities and Canada: "Do it in a Good Way.". *Journal of Empirical Research*  
30 *on Human Research Ethics* 2008;3(2):33-51.  
31  
32 [32] First Nations Centre. *First Nations Conceptual Frameworks and Applied Models*  
33 *on Ethics, Privacy, and Consent in Health Research and Information*. Ottawa:  
34 *National Aboriginal Health Organization (NAHO)*; 2006.  
35  
36 [33] Ontario Federation of Indian Friendship Centres (OFIFC). *USAI Utility Self-*  
37 *Voicing Access Inter-relationship Reserach Framework*. 2012.  
38  
39 [34] Statistics Canada. Hamilton, Ontario (Code3525005) (table). *2006 Community*  
40 *Profiles*. 2006 Census. Ottawa ON: Statistics Canada; 2007. Report No.:  
41 *Catalogue no. 92-591-XWE*.  
42  
43 [35] Salganik M.J. Variance estimation, design effects, and sample size calculations  
44 for respondent-driven sampling. *Journal of Urban Health* 2006;83(6 (Suppl)):98-  
45 112.  
46  
47 [36] Firestone M. *Our Health Counts: Unmasking Health and Social Disparities among*  
48 *Urban Aboriginal People in Ontario* University of Toronto; 2013.  
49  
50 [37] IBM® SPSS® Data Collection Author [computer program]. Version 6.0.1.  
51 Chicago, IL: SPSS Inc.; 2000.  
52  
53  
54  
55  
56  
57  
58  
59  
60

- 1  
2  
3  
4  
5  
6  
7  
8  
9  
10  
11  
12  
13  
14  
15  
16  
17  
18  
19  
20  
21  
22  
23  
24  
25  
26  
27  
28  
29  
30  
31  
32  
33  
34  
35  
36  
37  
38  
39  
40  
41  
42  
43  
44  
45  
46  
47  
48  
49  
50  
51  
52  
53  
54  
55  
56  
57  
58  
59  
60
- [38] Respondent-Driven Sampling Analysis Tool (RDSAT) Version 7.1 [computer program]. Ithaca, New York: Cornell University; 2007.
- [39] Wejnert C. An Empirical Test of Respondent-Driven Sampling: Point Estimates, Variance, Degree Measures, and Out-of-Equilibrium Data. *Sociological Methodology* 2009;39(1):73-116.
- [40] Firestone M., Smylie J, Maracle S., et al. Concept Mapping: Application of a Community-Based Methodology in three Urban Aboriginal Populations. *American Indian Culture and Research Journal*, Under Review 2014;38(4).
- [41] Statistics Canada. Persons per room of private household. <http://www.statcan.gc.ca/concepts/definitions/dwelling-logement-07-eng.html> 2013 Available from: URL: <http://www.statcan.gc.ca/concepts/definitions/dwelling-logement-07-eng.html>
- [42] Statistics Canada no.92-594-XWE. Hamilton, Ontario (Code 3525005) (table). Aboriginal Population Profile. 2006 Census. <http://www12.statcan.ca/census-recensement/2006/dp-pd/prof/92-594/index.cfm?Lang=E> (accessed January 20, 2014) 2007 [cited 11 A.D. Apr 30];
- [43] Health Canada. A Statistical Profile on the Health of First Nations in Canada, for the Year 2000. Ottawa; 2005. Report No.: H35-4/30-2000E-PDF.
- [44] Ontario Federation of Indian Friendship Centres (OFIFC), Ontario Métis Aboriginal Association, Ontario Native Women's Association (ONWA). Urban Aboriginal Task Force Final Report. Toronto ON; 2007.
- [45] McCaskill D., FitzMaurice K., Cidro J. Toronto Aboriginal Research Project (TARP) Final Report. 2011.
- [46] Anderson A.B. Home in the City. University of Toronto Press, 2013.
- [47] Peters E. Indigeneity and marginalization: planning for and with urban Aboriginal communities in Canada. *Progress in Planning* 2005;63(4):327-404.
- [48] Statistics Canada. Canadian Community Health Survey. Ottawa ON: Statistics Canada; 2007.
- [49] Muldoon L., Rowan M.S., Geneau R., et al. Models of primary care Service delivery in Ontario: Why such diversity? *Healthcare Management Forum* 2006;19(4):18-23.
- [50] Howard M., Goertzen J., Kaczorowski J., et al. Emergency Department and Walk-in Clinic Use in Models of Primary Care Practice with Different After Hours Accessibility in Ontario. *Health Care Policy* 2008;4(1):73-88.

- 1  
2  
3  
4 [51] Browne A., Smye V., Rodney P., et al. Access to primary care from the  
5 perspective of Aboriginal patients at an urban emergency department. *Qualitative*  
6 *Health Research* 2011;21(3):333-348.  
7  
8 [52] Browne A, Varcoe C., Wong S.T., et al. Closing the health equity gap: Evidence-  
9 based strategies for primary health care organizations. *International Journal for*  
10 *Equity in Health* 2012;11(59):1-15.  
11  
12 [53] Kurtz D.L.M., Nyberg J.C., Van Den Tillaart S., et al. Silencing of voice: An act  
13 of structural violence: Urban Aboriginal women speak out about their experiences  
14 with health care. *Journal of Aboriginal Health* 2008;4(1):53-63.  
15  
16 [54] Heimer R. Critical Issues and Further Questions About Respondent-Driven  
17 Sampling: Comment on Ramirez-Valles, *et al.* (2005). *AIDS and Behavior*  
18 2005;9(4):403-408.  
19  
20 [55] Gile K.J., Handcock M.S. Respondent-Driven Sampling: An Assessment of  
21 Current Methodology. *Sociological Methodology* 2010;40(1):285-327.  
22  
23 [56] Heckathorn D. Extensions of respondent-driven sampling: analyzing continuous  
24 variables and controlling for differential recruitment. *Sociological Methodology*  
25 2007;37(1):151-208.  
26  
27 [57] Goel S., Salganik M.J. Assessing respondent-driven sampling. *Proceedings of the*  
28 *National Academy of Sciences of the United States of America*  
29 2010;107(15):6743-6747.  
30  
31 [58] Wejnert C., Pham H., Krishna N., et al. Estimating design effect and calculating  
32 sample size for respondent-driven sampling studies of injection drug users in the  
33 United States. *AIDS Behavior* 2012;16(4):797-806.  
34  
35  
36  
37  
38  
39  
40  
41  
42  
43  
44  
45  
46  
47  
48  
49  
50  
51  
52  
53  
54  
55  
56  
57  
58  
59  
60

1  
2  
3  
4  
5  
6  
7  
8  
9  
10  
11  
12  
13  
14

## Unmasking Health Determinants and Health Outcomes for Urban First Nations Using Respondent Driven Sampling

Firestone M., Smylie J., Maracle S., Spiller M., ~~De dwa da dehs ney>s Aboriginal Health  
Access Centre,~~ O'Campo P.

### Corresponding Author:

15  
16  
17  
18  
19  
20  
21  
22  
23  
24  
25  
26  
27  
28  
29  
30  
31  
32

Firestone, Michelle  
Post-Doctoral Fellow, Centre for Research on Inner City Health (CRICH), St. Michael's  
Hospital  
209 Victoria, 3rd floor  
Toronto, Ontario Canada M5B 1C6  
Email: firestonem@smh.ca  
Phone: 416-864-6060 ext 77437  
Fax: 416-864-5558

Smylie, Janet  
Research Scientist, Centre for Research on Inner City Health (CRICH)  
Associate Professor, Department of Public Health Sciences, University of Toronto  
Toronto, Canada

Maracle, Sylvia  
Executive Director, Ontario Federation of Indian Friendship Centres (OFIFC)  
Toronto, Canada

~~De dwa da dehs ney>s Aboriginal Health Access Centre (DAHC)  
Hamilton, Canada~~

33  
34  
35  
36  
37  
38

Spiller, Michael  
Cornell University, Department of Sociology  
Ithaca, New York

39  
40  
41  
42  
43

O'Campo, Patricia  
Director, Centre for Research on Inner City Health  
Professor, Dalla Lana School of Public Health, University of Toronto  
Toronto, Canada

44  
45  
46  
47  
48  
49  
50  
51  
52  
53  
54

**Keywords:** Canada; urban Aboriginal health; First Nations; Respondent-Driven  
Sampling; Community-based Research

**Word Count:** ~~3,7394,233~~

Formatted: None

## ABSTRACT

**Objective:** Population based health information on urban Aboriginal populations in Canada is limited due to challenges with the identification of Aboriginal persons in existing health datasets. The main objective of the Our Health Counts (OHC) project was to work in partnership with Aboriginal stakeholders to generate a culturally relevant, representative baseline health data set for three urban Aboriginal communities in Ontario, Canada. **Design:** Respondent-Driven Sampling.

**Setting:** Hamilton, Ontario, Canada.

**Participants:** The OHC study, in partnership with De dwa da dehs ney's Aboriginal Health Access Centre (DAHC) recruited 554 First Nations adults living in Hamilton using RDS.

**Results:** Among First Nations adults living in Hamilton, 78% earned less than \$20,000 per year and 70% lived in the lowest income quartile neighbourhoods. Mobility and crowded living conditions were also highly prevalent. Common chronic diseases included arthritis, hypertension, diabetes and COPD and rates of emergency room access were elevated.

**Conclusions:** RDS is an effective sampling method in urban Aboriginal contexts as it builds upon existing social networks and successfully identified a population-based cohort. The findings illustrate striking disparities in health determinants and health outcomes between urban First Nations individuals and the general population which have important implications for health services delivery, programming and policy development.

Formatted: Font: (Default) Times New Roman

## ARTICLE SUMMARY

### Strengths and limitations of this study:

- Our study is the first RDS of self-identified First Nations people residing in an urban setting in Canada
- This study models best practices in academic-Aboriginal community research partnerships
- RDS has been demonstrated to be a promising tool for generating Aboriginal health assessment measures in urban areas where there are limited existing sampling frame options
- At present, multivariable regression analyses using RDS samples have not appropriately addressed the co-relation between observations and the unequal

1  
2  
3  
4  
5  
6  
7  
8 sampling probabilities inherent in RDS; therefore we present prevalence estimates for  
9 which methods are better established  
10  
11  
12  
13  
14  
15  
16  
17  
18  
19  
20  
21  
22  
23  
24  
25  
26  
27  
28  
29  
30  
31  
32  
33  
34  
35  
36  
37  
38  
39  
40  
41  
42  
43  
44  
45  
46  
47  
48  
49  
50  
51  
52  
53  
54  
55  
56  
57  
58  
59  
60

For peer review only

INTRODUCTION

According to the 2006 Census, over 60% (150,570 people) of Aboriginal<sup>a</sup> people living in Ontario live in urban areas. [1](4) Nearly seven out of ten Métis live in urban areas, and about three out of every four people in the off-reserve First Nations population live in urban areas. [1](4) First Nations people have historically been dislocated from their original homelands and may constitute diasporic, heterogeneous communities in urban areas. [2](2) Specifically, an increasing number of First Nations individuals are moving to urban centres to seek better housing, employment and education opportunities and for the services and amenities available. [3-5](3-5) There is a growing body of literature exploring the complexities of urban indigeneity [6](6) and some of the elements which distinguish urban Aboriginal identity are social and economic marginalization, a growing middle class, and population diversity in terms of cultural origins and legal status. [7](7) According to the Canadian Census, First Nations, Inuit, and Métis populations experience ongoing disparities in social determinants of health such as income insecurity, unemployment, low levels of education, decreased food availability, and inadequate housing compared to non-Aboriginal Canadians, and these disparities are exacerbated with urban residence. [1;8-9](1;8-9)

Despite the growing size of the urban Aboriginal population in Canada, accessible and culturally relevant population health data for this population are almost non-existent. [10-13](10-13) While census data do exist, there are serious deficits in population health measures. [13](13) Some of the reasons behind this deficiency are limitations in the current health information system and data collection processes with respect to Aboriginal peoples. [14;15](14;15) Sampling frames are often biased and comprise non-random subpopulations such as lists of members or clients of particular programs and services in the community. When urban Aboriginal people have been included in census-based national surveys, these surveys were underpowered and often First Nations, Inuit, and Métis data could not be successfully disaggregated. [14;16](14;16) Additionally, studies based on Census data show that a significant number of Aboriginal people move from rural and reserve areas to cities, and back and forth as well as within and among cities. [4;17](4;17) These factors make it difficult to get reliable counts of the Aboriginal population of a city.

<sup>a</sup> “Aboriginal people” is a collective name for all of the original peoples of Canada and their descendants. The *Constitution Act* of 1982 specifies that the Aboriginal Peoples in Canada consist of three groups: Indians, Inuit and Métis. The term First Nations came into common use in the 1970s to replace Indian, which some people found offensive. Despite its widespread use, there is no legal definition for this term in Canada. In the United States, the term “Native American” is used to represent Indigenous peoples from North America, including Mexico. For alignment with the US Constitution and to ensure policy implications, the term “American Indian” is still used for Indigenous populations living within US borders, particularly the lower 48 states and parts of Alaska. “Indigenous” is a term used in the international context.

Field Code Changed

Formatted: Font: (Default) Arial, Do not check spelling or grammar

Formatted: Font: (Default) Arial, Do not check spelling or grammar

Field Code Changed

Formatted: Font: (Default) Arial, Do not check spelling or grammar

Formatted: Font: (Default) Arial, Do not check spelling or grammar

Formatted: Font: (Default) Arial, Do not check spelling or grammar

Formatted: Font: (Default) Arial, Do not check spelling or grammar

Field Code Changed

Field Code Changed

Field Code Changed

Formatted: Font: (Default) Arial, Do not check spelling or grammar

Formatted: Font: (Default) Arial, Do not check spelling or grammar

Field Code Changed

Formatted: Font: (Default) Arial, Do not check spelling or grammar

Formatted: Font: (Default) Arial, Do not check spelling or grammar

Field Code Changed

Field Code Changed

Field Code Changed

Formatted: Font: (Default) Arial, Do not check spelling or grammar

Formatted: Font: (Default) Arial, Do not check spelling or grammar

Field Code Changed

Field Code Changed

Field Code Changed



At the national level, the continued inability to identify Aboriginal peoples in healthcare databases leads to very poor coverage of Aboriginal populations in Canada, with a specific paucity of health information for First Nations, Métis, and Inuit living in urban areas. Provincial and territorial systems generally do not collect ethnic-specific utilization data, and their ethnic flags for vital statistics are inconsistent or absent.<sup>[18](48)</sup> The federal government’s decision to cancel the long form of the Canadian national census will further challenge the ability of researchers and communities to identify and address social inequities across and within populations who experience racialization and the negative effects of structural discrimination in healthcare and other sectors, thus widening the existing health and social policy vacuum.<sup>[19;20](49;20)</sup>

In the absence of an accessible and accurate population based sampling frame for urban Aboriginal people, we implemented respondent driven sampling (RDS) for the Our Health Counts (OHC) study. RDS, like other chain-referral approaches, relies on members of a population to recruit their peers.<sup>[21;22](21;22)</sup> However, RDS differs from other methods because of estimation procedures that adjust for the participants’ different probabilities of being sampled.<sup>[22](22)</sup> RDS also differs from other chain-referral methods because the number of recruitments any participant can make is limited, and it employs a dual incentive structure where participants are rewarded both for participating and for recruiting their peers.<sup>[23](23)</sup>

There is limited literature on RDS in Indigenous contexts;<sup>[24](24)</sup> however, there is evidence that links the success of RDS to the strength of social networks and relationships.<sup>[25](25)</sup> Indigenous knowledges are wholistic, relational and embraces a fluidity that allows for constant growth and change.<sup>[26;27](26;27)</sup> Aboriginal identities tend to value the group over the individual, thereby establishing models of kinship whereby everyone has the right to give and receive according their own choices.<sup>[26](26)</sup> Therefore, we hypothesized that RDS would be an appropriate and effective sampling methodology as it builds on social networks and would draw on existing kinship systems known to be present in Indigenous communities.<sup>[28](28)</sup>

The main objective of the OHC project was to work in partnership with Aboriginal stakeholders to generate a culturally relevant, representative baseline health data set for three urban Aboriginal communities in Ontario, Canada. The results presented here pertain specifically to the urban First Nations population in Hamilton where the organizational project lead was the Ontario Federation of Indian Friendship Centres (OFIFC) and the community partner was De dwa da dehs ney>s Aboriginal Health Access Centre (DAHC).

**METHODS**

**Community-based participatory research**

This study upheld current ethical and scientific standards in Indigenous health research<sup>[29-33](29-33)</sup> through a community based participatory research partnership between the academic research team, OFIFC and DAHC. We ensured that our Aboriginal decision making partners were active in all aspects of the research through the following mechanisms: Aboriginal leadership; research agreements which explicitly

Formatted: Font: (Default) Arial, Do not check spelling or grammar

Field Code Changed

Formatted: Font: (Default) Arial, Do not check spelling or grammar

Field Code Changed

Field Code Changed

Formatted: Font: (Default) Arial, Do not check spelling or grammar

Field Code Changed

Formatted: Font: (Default) Arial, Do not check spelling or grammar

Field Code Changed

Formatted: Font: (Default) Arial, Do not check spelling or grammar

Formatted: Font: (Default) Arial, Do not check spelling or grammar

Field Code Changed

Formatted: Font: (Default) Arial, Do not check spelling or grammar

Formatted: Font: (Default) Arial, Do not check spelling or grammar

Formatted: Font: (Default) Arial, Do not check spelling or grammar

Formatted: Font: (Default) Arial, Do not check spelling or grammar

Field Code Changed

Field Code Changed

Field Code Changed

Formatted: Font: (Default) Arial, Do not check spelling or grammar

Formatted: Font: (Default) Arial, Do not check spelling or grammar

Field Code Changed

Formatted: Font: (Default) Arial, Do not check spelling or grammar

Formatted: Font: (Default) Arial, Do not check spelling or grammar

Field Code Changed

1  
2  
3  
4  
5  
6  
7  
8 addressed issues of project governance, community expectations, benefits, ownership,  
9 control, access, and possession of information, and dissemination of project results;  
10 capacity building through staffing at community sites, data workshops and awareness  
11 building; respect for the individual and collective rights of Aboriginal peoples with  
12 respect to their health information; cultural relevance through the development and  
13 application of culturally appropriate measures; representation of the urban Aboriginal  
14 population of Ontario; and sustainability of the project to ensure ~~expansion of that this the~~  
15 database ~~can be geographically and longitudinally expanded.~~ DAHC In addition, a  
16 Governing Council, comprised of representatives from the core ~~partner~~ urban Aboriginal  
17 provincial organizations was established to oversee all stages of the research process.  
18 Specifically, this body adhered to governance protocols and ensured that individual and  
19 collective community rights were respected, were kept informed about the project's  
20 progress and led the project towards meaningful results, acted as a resource to the  
21 community on questions related to various portions of the research project and controlled  
22 the release of all data generated by the study.

23  
24 All members of the study team were from the Aboriginal community, living in the  
25 general vicinity of the city of Hamilton. Formal ethics approval was provided by the  
26 Research Ethics Board of St. Michael's Hospital in Toronto.

### 27 Study Site

28  
29 The City of Hamilton is located in southern Ontario on what was traditionally  
30 Haudenosaunee (Iroquian) territory and is near two First Nations reserves: Six Nations of  
31 the Grand River and Mississaugas of the New Credit. According to the 2006 Census, the  
32 total Aboriginal population in Hamilton was 13,735 people, comprising 2.8% of the total  
33 population of the city. ~~[34](34)~~ The OFIFC identified the city of Hamilton as a promising  
34 community site based on its significant Aboriginal population and strong infrastructure of  
35 Aboriginal community services.

### 36 Recruitment

37  
38 The RDS process was initiated through the purposive selection of individuals to begin  
39 recruitment, also called "seeds." Inclusion criteria for participation in the study included  
40 18 years of age, residence within the geographic boundaries of the City of Hamilton and  
41 self-identified as having First Nations identity. First Nations identity was determined  
42 through open dialogue around family, experiences, and location while also explaining the  
43 overall study goals and additional study sites in Ottawa. Questions such as: "What words  
44 best describe you?" and "How do you see yourself?" were useful. With the help of  
45 community partners, six seeds were identified and agreed to participate. In order for  
46 seeds to reflect a diverse demographic of First Nations people living in Hamilton, factors  
47 such as gender, age, family size, and occupations were considered in their selection. For  
48 example, seeds were identified in the student population, among the steel workers union,  
49 among artists, elders, housing and social assistance providers as well as members of local  
50 Aboriginal organizations and boards. Five of the six seeds produced referrals within the  
51 two weeks leading up to the December 2009 holiday closure at DAHC. In February and  
52 March 2010, three additional seeds were added.

Field Code Changed

Formatted: Font: (Default) Arial, Do not check spelling or grammar

Formatted: Font: (Default) Arial, Do not check spelling or grammar

Study participants, including seeds, provided informed consent and then completed a health assessment survey after which they received 3-5 coded coupons to refer a member of their social network into the study. Following the holiday closure of DAHC, the number of distributed coupons per recruit was increased from 3 to 5 in order to increase the rate of recruitment. Participants received a monetary reimbursement of \$20 for their time and participation. They also received an additional \$10 for every eligible person they recruited into the study. Study recruitment and interviews took place in an Aboriginal community centre.

For sample size calculation, we assumed 95% confidence intervals (CI), survey item prevalence ranges from 10% to 75% and a design effect of 2.<sup>[35](35)</sup> Based on this formula, the OCH study aimed to recruit 500 First Nations adults and 250 children.

### Sources of Data

Community concept mapping was implemented to develop a community specific survey for First Nations in Hamilton, <sup>[36](36)</sup> which was comprised of 8 domains covering areas such as sociodemographics, physical, mental, and emotional health, First Nations identity and impacts of colonization (i.e. questions about Residential School attendance, involvement of child protection agencies, dislocation from traditional lands and discrimination), and access and barriers to care. The survey tool was piloted with First Nations community members, and minor modifications were made to improve face validity. Data were collected and compiled by computer-assisted personal interviewing with a computer based version of the survey tool developed by the research team using SPSS Data Collection Author and Collector.<sup>[37](37)</sup>

Upon completion of recruitment and survey, our sample of First Nations adults was linked to data holdings at the Institute of Clinical Evaluative Sciences (ICES) including provincial records of emergency room and hospital visits (Canadian Institutes of Health Information – Discharge Abstract Database and National Ambulatory Care Reporting System: Emergency), and neighbourhood income quintiles (derived from Census data). Using health care system identification numbers (i.e. Ontario Health Card) provided by participants, we successfully linked 92% (N=725) of First Nations adults to the ICES database.

### Analysis

Recruitment dynamics, adjusted population based estimates and confidence intervals were calculated using the RDS-I enhanced data smoothing estimator in the custom RDSAT software (version 7.1).<sup>[38](38)</sup> The RDS methodology anticipates that personal networks are not randomly distributed, and therefore adjusts for small to moderate levels of network clustering (people who have ties to others like them), in the form of post-sampling weights.

### RESULTS

Formatted: Font: (Default) Arial, Do not check spelling or grammar

Field Code Changed

Formatted: Font: (Default) Arial, Do not check spelling or grammar

Field Code Changed

Formatted: Font: (Default) Arial, Do not check spelling or grammar

Formatted: Font: (Default) Arial, Do not check spelling or grammar

Formatted: Font: (Default) Arial, Do not check spelling or grammar

Formatted: Font: (Default) Arial, Do not check spelling or grammar

Field Code Changed

Field Code Changed

Formatted: Font: (Default) Arial, Do not check spelling or grammar

Formatted: Font: (Default) Arial, Do not check spelling or grammar

Among First Nations adults in Hamilton, 78.9% of participants were recruited via referral trees originating from two seeds. With 19 and 32 waves respectively, the lengths of both of these recruitment chains were long enough to overcome the original sampling bias, which usually happens after 6 or 7 waves of recruitment.<sup>139(39)</sup> The statistical theory is that if the chain-referral process consists of enough waves or cycles of recruitment, the composition of the final sample with respect to key characteristics and behaviors will become independent of the seeds from which it began. The point at which the sample composition becomes stable is termed “equilibrium” and is an indication that RDS has been implemented successfully.<sup>121(21)</sup>

Over a period of four and a half months (November 2009 to March 2010) a total of 790 persons were recruited, including 554 adults and 236 children. Overall, a high response rate for survey questions was observed. Specifically, non-response rates ranged from 2.5% to less than 0.5%, including ~~Even more~~ sensitive questions around income, food security, and impacts of colonization, which had ~~very low~~ non-response rates under 2%. Such high response rates can be attributed to the survey tool itself, which reflected the health priorities of the community<sup>140(40)</sup> and which was administered in a safe and culturally secure context. Demographic and social characteristics are presented in Table 1.

**Table 1. Demographic and social characteristics of First Nations adults (Total N=554)**

| Characteristic                                                                  | Prevalence % (95% CI) |
|---------------------------------------------------------------------------------|-----------------------|
| <b>Sex</b>                                                                      |                       |
| Male                                                                            | 59.9 (53.3, 67.2)     |
| <b>Age</b>                                                                      |                       |
| 18-34                                                                           | 40.2 (33.3, 48)       |
| 35-49                                                                           | 35.4 (28.7, 41.6)     |
| 50+                                                                             | 24.4 (18.4, 30.8)     |
| <b>Education</b>                                                                |                       |
| Some high school or less                                                        | 57.3 (51.1, 64)       |
| Completed high school                                                           | 19.5 (14.5, 24.7)     |
| Some or completed college                                                       | 18.3 (13.3, 23.3)     |
| Some or completed University                                                    | 5 (2.4, 8)            |
| <b>Income sources for household</b>                                             |                       |
| Provincial or municipal social assistance or welfare (e.g. ODSP, Ontario Works) | 69.2 (63.1, 75)       |
| Wages and salaries                                                              | 28.2 (22.1, 34.2)     |
| Child Tax Benefit                                                               | 17 (12.4, 21.8)       |
| Any other income support                                                        | 13.3 (9.2, 17.6)      |
| Employment insurance                                                            | 9.6 (5.4, 14.3)       |
| Income from self-employment                                                     | 7.7 (4.3, 11.7)       |
| Child Support payments                                                          | 3 (1.1, 4.6)          |
| <b>Individual annual income</b>                                                 |                       |
| \$0-4,999                                                                       | 18.3 (13.4, 24.8)     |

Formatted: Font: (Default) Arial, Do not check spelling or grammar

Formatted: Font: (Default) Arial, Do not check spelling or grammar

Field Code Changed

Field Code Changed

Formatted: Font: (Default) Arial, Do not check spelling or grammar

Formatted: Font: (Default) Arial, Do not check spelling or grammar

Formatted: Font: (Default) Arial, Do not check spelling or grammar

Formatted: Font: (Default) Arial, Do not check spelling or grammar

Field Code Changed

1  
2  
3  
4  
5  
6  
7  
8  
9  
10  
11  
12  
13  
14  
15  
16  
17  
18  
19  
20  
21  
22  
23  
24  
25  
26  
27  
28  
29  
30  
31  
32  
33  
34  
35  
36  
37  
38  
39  
40  
41  
42  
43  
44  
45  
46  
47  
48  
49  
50  
51  
52  
53  
54  
55  
56  
57  
58  
59  
60

|                                                                               |                   |
|-------------------------------------------------------------------------------|-------------------|
| \$5,000-5,999                                                                 | 23.1 (17.1, 28.5) |
| \$10,000-14,999                                                               | 21.9 (16.3, 27.6) |
| \$15,000-19,999                                                               | 14.8 (10.7, 20)   |
| \$20,000+                                                                     | 21.8 (16, 27.6)   |
| <b>Mobility</b>                                                               |                   |
| No moves in past 5 years                                                      | 10.2 (6.2, 14.8)  |
| 1 move in past 5 years                                                        | 15.5 (10.5, 20.6) |
| 2 moves in past 5 years                                                       | 20.2 (15.4, 26.4) |
| 3-5 moves in past 5 years                                                     | 41.1 (35, 48.6)   |
| 6-10 moves in past 5 years                                                    | 10.4 (5.7, 13.4)  |
| <b>Overcrowding*</b>                                                          |                   |
| <=1 persons per room                                                          | 27.7 (21.6, 33.8) |
| 1-2 persons per room                                                          | 46 (40.5, 54.3)   |
| >2 persons per room                                                           | 26.3 (19.7, 30.8) |
| <b>Food security</b>                                                          |                   |
| You and others always had enough of the kinds of food you wanted to eat       | 26.7 (21.1, 32.8) |
| You and others had enough to eat, but not always the kinds of food you wanted | 51.5 (45.3, 58)   |
| Sometimes or often you did not have enough to eat**                           | 21.8 (16.5, 27)   |

Note. CI = confidence interval.

\*Following Statistics Canada standards: calculated by dividing the number of rooms in each household (excluding the bathroom) by the number of people residing in the home, where a higher value of 'persons per room' indicates a higher level of crowding.<sup>[41](41)</sup>

\*\* Collapsed sometimes and often you did not have enough food to eat

The data presented in Table 2 for age, gender and income quintiles compare the OHC population estimates with the total Hamilton population and a random subset of 10% of the Ontario provincial population. The three populations were very similar with respect to the gender breakdown, however, the OHC sample was younger than the general Hamilton and Ontario populations which is consistent with Census data.<sup>[42](42)</sup> Over 70% of the First Nations population fell into the lowest income quartile compared to 25% of the general Hamilton population and 20% of the Ontario population. At the higher end of the income scale, we observed that while 15% of Hamilton residents and 20% of the Ontario population fell into the highest income quartile, only 3% of the study population was earning in this category.

**Table 2. Gender, Age and Income Quintile for First Nations Adults, City of Hamilton and Ontario-10%**

| Variable | Sample             |                        |                            |                                 |
|----------|--------------------|------------------------|----------------------------|---------------------------------|
|          | OHC (Total N=725*) | OHC-RDS-Adjusted       | Hamilton (Total N=536,253) | Ontario-10% (Total N=1,324,241) |
|          | Prevalence, %      | Prevalence, % (95% CI) | Prevalence, %              | Prevalence, %                   |

Formatted: Font: (Default) Arial, Do not check spelling or grammar

Field Code Changed

Formatted: Font: (Default) Arial, Do not check spelling or grammar

Field Code Changed

Formatted: Font: (Default) Arial, Do not check spelling or grammar

Formatted: Font: (Default) Arial, Do not check spelling or grammar



|                 |       |                   |      |      |
|-----------------|-------|-------------------|------|------|
| Sex             |       |                   |      |      |
| Female          | 49.4  | 37.6 (29.6, 43.6) | 50.9 | 51.2 |
| Male            | 50.6  | 62.4 (56.4, 70.4) | 49.1 | 48.7 |
| Age**           |       |                   |      |      |
| 18-34           | 37.4  | 41.9 (34.4, 49.9) | 28.2 | 28.2 |
| 35-49           | 37.6  | 36.6 (29.9, 43.1) | 28.1 | 29.5 |
| 50-64           | 22.9  | 20.7 (14.7, 26.9) | 24.8 | 24.8 |
| 65+             | 2.1   | 0.8 (0.3, 1.6)    | 18.9 | 17.6 |
| Income Quintile |       |                   |      |      |
| 1-Low           | 71.76 | 73 (66.5, 79.2)   | 25.1 | 19.5 |
| 2               | 16.22 | 11.8 (7.7, 16)    | 22.8 | 19.8 |
| 3               | 6.3   | 7.4 (3.6, 10.5)   | 20.3 | 19.8 |
| 4               | 2.48  | 4.9 (2.5, 9.8)    | 17   | 20.4 |
| 5-High          | 1.34  | 3 (1.1, 5.4)      | 14.7 | 20.2 |

Note. CI = confidence interval; OHC = Our Health Counts; RDS = Respondent Driven Sampling.

\*Total N reflects number of participants linked to ICES database

\*\*Age of participants on 2010-04-01

The most common self-reported chronic conditions that had been diagnosed by a health care provider among First Nations adults (n=554) in Hamilton included arthritis (30.7%; 95% CI 25.4-36.8), hypertension (25.8%; 95% CI 20.3-31.6), asthma (19%; 95% CI 14.9-24.6), diabetes (15.6%; 95% CI 11.2-21.1), heart disease (8.4%; 95% CI 4.8-12.5) and COPD (8.4%; 95% CI 5.3-11.8). The prevalence of self-reported Hepatitis C was 8.7% (95% CI 4.3-11.7). 25% reported having been injured over the past 12 months. Self-reported upper respiratory tract infection (URTI) was common, with 73% (95% CI 67.9-79.9) of adults reporting URTI in the past 12 months.

Among First Nations adults (n=554), 16.7% (95% CI 11.4 – 22.1) felt that availability of health services in their community was excellent, 43.3% (95% CI 36.1 - 49.6) felt it was good, 28.9% (95% CI 23.3 – 35.2) felt it was fair and 11.1% (95% CI 7.9 – 15.6) felt availability was poor. The fact that 40% of the population felt their level of access to health care was fair or poor, despite the geographic proximity to extensive health and social services that the City of Hamilton provides, substantiates the idea that just because the services are geographically proximate, does not mean that they are accessible to First Nations people. Close to half (47.9%) of the First Nations living in Hamilton reported that long waiting lists to see a specialist were a barrier (95% CI 41.9 - 55.4). Other common barriers included: not being able to arrange transportation; doctor not available; not being able to afford direct costs and/or transportation; services not covered by Non-Insured Health Benefits and lack of trust in health care provider.

Both acute and non-acute emergency room visits were much more frequent among First Nations in Hamilton compared to the general Hamilton and Ontario populations. According to data linkages with ICES, a striking 10.6% of the First Nations adult population in Hamilton made 6 or more emergency room visits in the previous 2

years compared to 1.6% and 1.9% of the Hamilton and Ontario adult populations respectively (Table 3).

**Table 3. Number of Emergency Room visits in the Previous 2 Years for Adults (18-64 years), First Nations, City of Hamilton and Ontario-10%**

| Frequency of ER visits       | Sample             |                        |                            |                               |
|------------------------------|--------------------|------------------------|----------------------------|-------------------------------|
|                              | OHC (Total N=514*) | OHC RDS-Adjusted       | Hamilton (Total N=360,378) | Ontario-10% (Total N=901,509) |
|                              | Prevalence, %      | Prevalence, % (95% CI) | Prevalence, %              | Prevalence, %                 |
| None                         | 31.5               | (25.8 – 37.5)          | 66.3                       | 69.1                          |
| 1                            | 26.2               | (20.7 – 32.8)          | 18.7                       | 16.8                          |
| 2-5                          | 31.7               | (25.9 – 37.8)          | 13.4                       | 12.3                          |
| 6+                           | 10.6               | (6.2 – 14.5)           | 1.6                        | 1.9                           |
| <b>ER visits (acute)</b>     |                    |                        |                            |                               |
| None                         | 50.2               | (43.9 – 57.5)          | 78.4                       | 80.1                          |
| 1                            | 24.7               | (18.7 – 30.1)          | 14.2                       | 13.1                          |
| 2-5                          | 20.7               | (15.3 – 26.1)          | 6.8                        | 6.3                           |
| 6+                           | 4                  | 1.6 – 6.9)             | 0.6                        | 0.6                           |
| <b>ER visits (non-acute)</b> |                    |                        |                            |                               |
| None                         | 54.3               | (47.6 – 61.2)          | 79.4                       | 81.2                          |
| 1                            | 22.4               | (17.3 – 28.5)          | 14                         | 12.2                          |
| 2-5                          | 20.4               | (14.5 – 25.4)          | 6.3                        | 6                             |
| 6+                           | 2.9                | (1 – 5.6)              | 0.4                        | 0.6                           |

Note. CI= confidence interval; OHC = Our Health Counts; RDS = Respondent Driven Sampling

\*Total N reflects number of adults aged 28-64 linked to ICES database

Based on ICES data linkages, rates of hospitalization were slightly higher among the First Nations population compared to the Hamilton and Ontario populations. This ~~can~~ **may** partly be explained by a higher birth rate among First Nations populations compared to the general Canadian population, ~~[43](43)~~ which is reflected by higher rates of obstetrics hospitalization compared to the general Hamilton and Ontario population: 7.3% (95% CI, 3.9 – 10.9) of the Hamilton First Nations population between the ages of 18 and 64 years had been hospitalized at least once in the past 5 years for obstetrical reasons compared to 4% of both the general Hamilton and Ontario populations in the same age group and over the same time period. However, given the high rates of chronic diseases such as diabetes and heart disease and the much higher rates of emergency room use among the First Nations population, these findings were unexpected and therefore require further investigation.

**DISCUSSION**

**Field Code Changed**

**Formatted:** Font: (Default) Arial, Do not check spelling or grammar

**Formatted:** Font: (Default) Arial, Do not check spelling or grammar



The OHC project generated a representative, urban Aboriginal health database. Through the successful application of RDS, a sample of urban First Nations individuals who might otherwise not have participated in mainstream surveys or the census was captured. In addition, given the current deficiency in public health information on urban First Nations populations, the statistically rigorous RDS sample allowed us to produce population-based estimates that can be utilized by local, regional, provincial and federal policy makers as well as urban Aboriginal stakeholders to address social inequities and health disparities facing this community.

Striking levels of poverty were identified in this study. The income data presented here may be a more representative income profile of the First Nations population in Hamilton than the 2006 Census. Specifically, the OHC data were adjusted for the sampling procedure using an RDS estimator and captured more 'hidden' populations such as persons who are homeless, transient or who have low literacy skills, who are known to be under-represented in the Census.<sup>[11;13](41;43)</sup> Further evidence of low incomes among this population is provided by the RDS-adjusted ICES income quintile data, which revealed that over 70% of the OHC cohort was in the lowest income quartile compared to 25% of the general Hamilton population and 20% of the Ontario population.

Accompanying high levels of poverty, housing and food insecurity were also highly prevalent among First Nations persons living Hamilton. Over half of the study population had moved at least 3 times in the past 5 years compared to 60% of the general Hamilton population who had not moved at all for the past 5 years.<sup>[34](34)</sup> Compared to an overcrowding rate of 3% for the general Canadian population in the 2006 Census,<sup>[1](4)</sup> 74% of First Nations persons in Hamilton live in crowded conditions. These findings echo those presented in the 2007 Urban Aboriginal Task Force (UATF) final report, which documented persistent obstacles with finding affordable housing, obtaining stable and secure employment and accessing appropriate services and resources among urban Aboriginal people.<sup>[44](44)</sup> Similarly, the Toronto Aboriginal Research Project (TARP) found that Aboriginal people in Toronto tend to concentrate in lower-income neighbourhoods where a significant proportion, particularly men, live in poverty.<sup>[45](45)</sup> Similar experiences have been reported in other urban jurisdictions across Canada.<sup>[46;47]</sup> While a growing proportion of urban Aboriginal people in Canada are achieving varying degrees of economic success in a number of skilled professions occupations.<sup>[5;45](5;45)</sup> there remains a significant amount of unmet basic needs among this population.

The burden of chronic conditions experienced by First Nations adults in Hamilton is disproportionately high. For example, 19% of the OHC Hamilton population reported having been told by a health care provider that they have asthma, which is more than twice the self-reported asthma rate (9.3%) for the overall Hamilton population in the 2007 Canadian Community Health Survey (CCHS).<sup>[48](46)</sup> Likewise, rates of arthritis and high blood pressure were 30.7% and 25.8% among First Nations adults in Hamilton compared to 19.9% and 19.7% among all adults in Hamilton as reported in the 2007 CCHS.<sup>[48](46)</sup> For First Nations adults in Hamilton, the rate of diabetes diagnosed by a health care provider was approximately three times the rate among the general Hamilton

Field Code Changed

Formatted: Font: (Default) Arial, Do not check spelling or grammar

Field Code Changed

Formatted: Font: (Default) Arial, Do not check spelling or grammar

Field Code Changed

Formatted: Font: (Default) Arial, Do not check spelling or grammar

Formatted: Font: (Default) Arial, Do not check spelling or grammar

Field Code Changed

Formatted: Font: (Default) Arial, Do not check spelling or grammar

Formatted: Font: (Default) Arial, Do not check spelling or grammar

Field Code Changed

Formatted: Font: (Default) Arial, Do not check spelling or grammar

Formatted: Font: (Default) Arial, Do not check spelling or grammar

Field Code Changed

Formatted: Font: (Default) Arial, Do not check spelling or grammar

Formatted: Font: (Default) Arial, Do not check spelling or grammar

Field Code Changed

Field Code Changed

Formatted: Font: (Default) Arial, Do not check spelling or grammar

Formatted: Font: (Default) Arial, Do not check spelling or grammar

population.<sup>[48](46)</sup> These findings are particularly disconcerting given the much younger age demographic of the First Nations Hamilton population and the documented barriers to receiving health care services including long wait lists, challenges with accessing and affording transportation and the unavailability of primary care providers including physicians, nurses, and other healthcare providers physicians in the area. Furthermore, 45.8% (95% CI 38.9-52.4) of First Nations adults believed that their ability to engage in preventative health activities (i.e. regular exercise, going to the doctor or nurse for health screening tests, accessing preventative dental care) had been affected by financial hardship.

High rates of emergency usage by First Nations persons living in Hamilton are likely linked to the problems in accessing non-emergency health care, as revealed by 40% of the population who rated their access to health care as fair or poor and 48% who indicated that wait lists are too long. In addition, as a result of primary healthcare reforms,<sup>[49](47)</sup> patients may be told by their primary care providers to go to the emergency department rather than a walk-in clinic when their primary care team is not available.<sup>[50](48)</sup> High rates of emergency room visits may also reflect a perceived lack of access to community-based or primary care settings and the extent to which high proportions of First Nations people continue to be dismissed or disregarded when attempting to access healthcare, despite geographic proximity.<sup>[51-53]</sup> Further examination is required to explore potential bias in hospital admission practices and to differentiate between types of hospitalizations (i.e. mental health, surgical and medical hospitalizations).

There were a number of limitations of the study. Firstly, it should be noted that we may have under sampled the elderly First Nations population living in nursing homes or residences for senior citizens in Hamilton. During our initial seed selection, we did not select any seeds from this population, and this population may have fewer network ties than other population groups, which may have resulted in an under representation of First Nations individuals over 65 years of age. Secondly, RDS cannot guarantee a random sample of network members:<sup>[54](49)</sup> therefore, estimates are unbiased to the degree that the assumptions of the RDS estimator are met. There is an active literature on RDS and estimation using RDS data,<sup>[55:56](50:51)</sup> and there is debate regarding the true design effects of RDS surveys.<sup>[57:58](52:53)</sup> Existing multivariable regression analyses using RDS samples have not appropriately addressed the co-relation between observations and the unequal sampling probabilities inherent in RDS, therefore, we have focused on reporting prevalence estimates for which methods are better established. Despite these limitations, RDS was used to effectively recruit an urban Aboriginal population and allowed for the derivation of rigorous population estimates and data linkages that have previously not been possible.

Given the near absence of population health information for urban Aboriginal people in Canada, this research is able to provide, for the first time, First Nations data that clearly demonstrate alarming socio-economic inequities, a significant burden of chronic disease, multiple barriers in access to health care and elevated emergency room use. This newly established health database represents a significant contribution to public health that will directly inform strategic directions for the improvement of health

**Field Code Changed**  
**Formatted:** Font: (Default) Arial, Do not check spelling or grammar  
**Formatted:** Font: (Default) Arial, Do not check spelling or grammar  
**Formatted:** Font: (Default) Times New Roman

**Field Code Changed**  
**Formatted:** Font: (Default) Arial, Do not check spelling or grammar  
**Formatted:** Font: (Default) Arial, Do not check spelling or grammar  
**Field Code Changed**  
**Formatted:** Do not check spelling or grammar  
**Formatted:** Font: (Default) Times New Roman  
**Formatted:** Font: (Default) Times New Roman  
**Formatted:** Font: (Default) Times New Roman  
**Field Code Changed**

**Field Code Changed**  
**Formatted:** Font: (Default) Arial, Do not check spelling or grammar  
**Formatted:** Font: (Default) Arial, Do not check spelling or grammar  
**Field Code Changed**  
**Field Code Changed**

and social status of urban Aboriginal people in Ontario. For example, this research will support the development of RDS as a tool to effectively recruit a larger cohort for longitudinal research with Aboriginal families in Ontario.

## AKCNOWLEDGEMENTS

Firstly, we would like to thank the First Nations men and women who participated in the Our Health Counts project and so generously shared their time and stories over the course of several months. The Our Health Counts project would not have been possible without the tremendous commitment and enthusiasm of the research staff at De dwa da dehs ney>s Aboriginal Health Access Centre in Hamilton. This project was funded by the Ontario Federation of Indian Friendship Centres (OFIFC), the Ministry of Health and Long Term Care (MOHLTC) Aboriginal Health Transition Fund, and the Centre for Research on Inner City Health (CRICH) at St. Michael's Hospital. The Institute for Clinical Evaluative Sciences (ICES) contributed the costs of the in-house ICES data analysis. Dr. Smylie was supported by a Canadian Institutes for Health Research New Investigator in Knowledge Translation award during the course of the project.

**Contributorship statement:** MF contributed substantially to the study conception and design, co-led data interpretation and analysis and drafted multiple versions of the manuscript. JS co-led the study conception and design, data analysis and interpretation and made important contributions to the draft and final manuscript. SM contributed substantially to study conception and design, was a member of the governing council that guided each stage of research, represented the Aboriginal organizational lead of the research and made important revisions to the draft manuscript. MS provided important technical support during data collection, co-led the data analysis and interpretation, and provided important revisions to the manuscript. PO contributed substantially to the study conception and design, analysis and interpretation of data and made important revisions to the draft manuscript.

**Competing interests:** There are no competing interests.

**Funding:** This project was funded by the Ontario Federation of Indian Friendship Centres (OFIFC), the Ministry of Health and Long Term Care (MOHLTC) Aboriginal Health Transition Fund, and the Centre for Research on Inner City Health (CRICH) at St. Michael's Hospital.

**Data sharing:** No additional data are available.

Formatted: Font: Times New Roman, 12 pt, Bold

Formatted: Font: Times New Roman, 12 pt

Formatted: Font: Times New Roman, 12 pt, Bold

Formatted: Font: Times New Roman, 12 pt

Formatted: Font: Times New Roman, 12 pt, Bold

Formatted: Font: Times New Roman, 12 pt

Formatted: Font: Times New Roman, 12 pt, Bold

Formatted: Font: Times New Roman, 12 pt

### Reference List

- [1] Statistics Canada. Aboriginal Peoples in Canada in 2006: Inuit, Métis and First Nations, 2006 Census. Ottawa ON: Ministry of Industry; 2008.
- [2] Canadian Institute for Health Research (CIHR). CIHR Guidelines for Health Research Involving Aboriginal People. Ottawa: CIHR; 20097.
- [3] National Aboriginal Health Organization (NAHO). Ways of Knowing: A Framework for Health Research. National Aboriginal Health Organization; 2003.
- [4] Policy Research Initiative. Not Strangers in these Parts. Urban Aboriginal Peoples. 2003.
- [5] Environics Institute. Urban Aboriginal Peoples Study Main Report. Environics Institute; 2010.
- [6] Peters E., Andersen C. Indigenous in the City: Contemporary Identities and Cultural Innovation. Vancouver: UBC Press, 2013.
- [7] Andersen C. Urban Aboriginality as a Distinctive Identity, in Twelve Parts. In: Peters E., Andersen C., editors. Indigenous in the City: Contemporary Identities and Cultural Innovation. Vancouver: UBC Press, 2013. 46.
- [8] Garner R., Carrière G., Sanmartin C., Longitudinal Health and Administrative Data Research Team. The Health of First Nations Living Off-Reserve, Inuit, and Métis Adults in Canada: The Impact of Socio-economic Status on Inequalities in Health. Ottawa: Statistics Canada, Health Analysis Division; 2010. Report No.: 82-622-X.
- [9] Tait H. Aboriginal Peoples Survey, 2006: Inuit Health and Social Conditions. Ottawa, ON: Statistics Canada; 2008.
- [10] Smylie J. Aboriginal infant mortality rate in Canada. Lancet 2012;380(9851):1384.
- [11] Anderson M., Smylie J. Performance measurement systems in Canada: How well do they perform in First Nations, Inuit and Métis Contexts? Pimatisiwin: A Journal of Aboriginal and Indigenous Community Health 2009;7(1):99-115.
- [12] Smylie J., Fell D., Ohlsson A. A Review of Aboriginal Infant Mortality Rates in Canada: Striking and Persistent Aboriginal and Non-Aboriginal Inequities. Canadian Journal of Public Health 2010;101(2):143-148.

Formatted: Space After: 12 pt

Formatted: Font: MyriadPro-Bold, Do not check spelling or grammar

Formatted: Font: MyriadPro-Regular, Do not check spelling or grammar

Formatted: Font: StoneSans, Do not check spelling or grammar

- 1  
2  
3  
4  
5  
6  
7  
8  
9  
10  
11  
12  
13  
14  
15  
16  
17  
18  
19  
20  
21  
22  
23  
24  
25  
26  
27  
28  
29  
30  
31  
32  
33  
34  
35  
36  
37  
38  
39  
40  
41  
42  
43  
44  
45  
46  
47  
48  
49  
50  
51  
52  
53  
54  
55  
56  
57  
58  
59  
60
- [13] [Smylie J., Anderson M. Understanding the health of Indigenous peoples in Canada: key methodologic and conceptual challenges. Canadian Medical Association Journal 2006;165\(6\):602-605.](#)
- [14] [Smylie J., Anderson I., Ratima M., et al. Who is Measuring and Why? Indigenous Health Performance Measurement Systems in Canada, Australia, and New Zealand. The Lancet 2006;367:2029-2031.](#)
- [15] [Siggner A.J. The Challenge of Measuring the Demographic and Socio-Economic Conditions of the Urban Aboriginal Population. In: Newhouse D., Peters E., editors. Strangers in these Parts: Urban Aboriginal Peoples. Ottawa: Policy Research Initiative, 2003. 119-130.](#)
- [16] [Smylie J., Lofters A., Firestone M., O'Campo P. Population-Based Data and Community Empowerment. In: O'Campo P., Dunn J., editors. Rethinking Social Epidemiology: Towards a Science of Change. Springer Publishing Company, 2011.](#)
- [17] [Graham K.A., Peters E.J. Aboriginal Communities and Urban Sustainability. Ottawa: Canadian Policy Research Networks; 2002.](#)
- [18] [Anderson M., Smylie J., Anderson I., Sinclair R., Crengle S., Ratima M. First Nations, Métis, and Inuit Health Indicators in Canada. A background paper for the project "Action oriented indicators of health and health systems development for Indigenous peoples in Canada, Australia, and New Zealand. Saskatoon: Indigenous Peoples Health Research Centre; 2006.](#)
- [19] [Collier R. Long-form census changes worries health researchers. Canadian Medical Association Journal 2010;182\(12\):E563-E564.](#)
- [20] [Webster P.C. Aboriginal health programming under siege, critics charge. Canadian Medical Association Journal 2012;184\(14\):E739-E740.](#)
- [21] [Heckathorn D. Respondent driven sampling: a new approach to the study of hidden populations. Social Problems 1997;44:174-199.](#)
- [22] [Heckathorn D. Respondent-driven sampling II: Deriving Valid Population Estimates from Chain referral Samples of Hidden Populations. Social Problems 2002;49\(1\):11-34.](#)
- [23] [Heckathorn D, Seeman S, Broadhead R, et al. Extensions of Respondent Driven Sampling: A new approach to the Study of Injection Drug Users aged 18-25. AIDS and Behavior 2002;6\(1\):55-67.](#)
- [24] [Evans-Campbell T., Lindhorts T., Huang B., et al. Interpersonal Violence in the Lives of Urban American Indian and Alaska Native Women: Implications for Health, Mental Health, and Help-Seeking. American Journal of Public Health 2006;96\(8\):1416-1422.](#)

- 1  
2  
3  
4  
5  
6  
7  
8  
9  
10  
11  
12  
13  
14  
15  
16  
17  
18  
19  
20  
21  
22  
23  
24  
25  
26  
27  
28  
29  
30  
31  
32  
33  
34  
35  
36  
37  
38  
39  
40  
41  
42  
43  
44  
45  
46  
47  
48  
49  
50  
51  
52  
53  
54  
55  
56  
57  
58  
59  
60
- [25] [Abdul-Quader A., Heckathorn D, Saidel T. Implementation and Analysis of Respondent Driven Sampling: Lessons from the Field. Journal of Urban Health 2006;83\(7\):1-5.](#)
- [26] [Greenwood M. Children as citizens of First Nations: Linking Indigenous health to early childhood development. Pediatrics and Child Health 2005;10\(9\):553-555.](#)
- [27] [Ermine W. Aboriginal Epistemology. In: Battiste M, Barman J., editors. First Nations Education in Canada: The Circle Unfolds. Vancouver: UBC Press, 1995. 101-112.](#)
- [28] [Smylie J., Kaplan-Myrth N., McShane K.E., et al. Indigenous Knowledge Translation: Baseline Findings in a Qualitative Study of the Pathways of Health Knowledge in Three Indigenous Communities in Canada. Health Promotion Practice 2009;10\(3\):436-446.](#)
- [29] [Canadian Institute of Health Research, Natural Sciences and Engineering Research Council of Canada, Social Sciences and Humanities Research Council of Canada. Tri-Council Policy Statement: Ethical Conduct for Research Involving Humans. 2010.](#)
- [30] [Canadian Institute for Health Research \(CIHR\). CIHR Guidelines for Health Research Involving Aboriginal People. Ottawa: CIHR; 2007.](#)
- [31] [Ball J., Janyst P. Enacting Research Ethics Partnerships with Indigenous Communities and Canada: "Do it in a Good Way.". Journal of Empirical Research on Human Research Ethics 2008;3\(2\):33-51.](#)
- [32] [First Nations Centre. First Nations Conceptual Frameworks and Applied Models on Ethics, Privacy, and Consent in Health Research and Information. Ottawa: National Aboriginal Health Organization \(NAHO\); 2006.](#)
- [33] [Ontario Federation of Indian Friendship Centres \(OFIFC\). USAI Utility Self-Voicing Access Inter-relationship Reserach Framework. 2012.](#)
- [34] [Statistics Canada. Hamilton, Ontario \(Code3525005\) \(table\). 2006 Community Profiles. 2006 Census. Ottawa ON: Statistics Canada; 2007. Report No.: Catalogue no. 92-591-XWE.](#)
- [35] [Salganik M.J. Variance estimation, design effects, and sample size calculations for respondent-driven sampling. Journal of Urban Health 2006;83\(6 \(Suppl\)\):98-112.](#)
- [36] [Firestone M. Our Health Counts: Unmasking Health and Social Disparities among Urban Aboriginal People in Ontario University of Toronto; 2013.](#)
- [37] [IBM® SPSS® Data Collection Author \[computer program\]. Version 6.0.1. Chicago, IL: SPSS Inc.; 2000.](#)

Formatted: Font: TT1656000, Do not check spelling or grammar



- 1  
2  
3  
4  
5  
6  
7  
8  
9  
10  
11  
12  
13  
14  
15  
16  
17  
18  
19  
20  
21  
22  
23  
24  
25  
26  
27  
28  
29  
30  
31  
32  
33  
34  
35  
36  
37  
38  
39  
40  
41  
42  
43  
44  
45  
46  
47  
48  
49  
50  
51  
52  
53  
54  
55  
56  
57  
58  
59  
60
- [38] [Respondent-Driven Sampling Analysis Tool \(RDSAT\) Version 7.1 \[computer program\]. Ithaca, New York: Cornell University; 2007.](#)
- [39] [Wejnert C. An Empirical Test of Respondent-Driven Sampling: Point Estimates, Variance, Degree Measures, and Out-of-Equilibrium Data. \*Sociological Methodology\* 2009;39\(1\):73-116.](#)
- [40] [Firestone M., Smylie J, Maracle S., et al. Concept Mapping: Application of a Community-Based Methodology in three Urban Aboriginal Populations. \*American Indian Culture and Research Journal\*. Under Review 2014;38\(4\).](#)
- [41] [Statistics Canada. Persons per room of private household. <http://www.statcan.gc.ca/concepts/definitions/dwelling-logement-07-eng.html> 2013 Available from: URL: <http://www.statcan.gc.ca/concepts/definitions/dwelling-logement-07-eng.html>.](#)
- [42] [Statistics Canada no.92-594-XWE. Hamilton, Ontario \(Code 3525005\) \(table\). Aboriginal Population Profile. 2006 Census. <http://www12.statcan.ca/census-recensement/2006/dp-pd/prof/92-594/index.cfm?Lang=E> \(accessed January 20, 2014\) 2007 \[cited 11 A.D. Apr 30\];](#)
- [43] [Health Canada. A Statistical Profile on the Health of First Nations in Canada, for the Year 2000. Ottawa; 2005. Report No.: H35-4/30-2000E-PDF.](#)
- [44] [Ontario Federation of Indian Friendship Centres \(OFIFC\), Ontario Métis Aboriginal Association, Ontario Native Women's Association \(ONWA\). \*Urban Aboriginal Task Force Final Report\*. Toronto ON; 2007.](#)
- [45] [McCaskill D., FitzMaurice K., Cidro J. Toronto Aboriginal Research Project \(TARP\) Final Report. 2011.](#)
- [46] [Anderson A.B. \*Home in the City\*. University of Toronto Press, 2013.](#)
- [47] [Peters E. Indigeneity and marginalization: planning for and with urban Aboriginal communities in Canada. \*Progress in Planning\* 2005;63\(4\):327-404.](#)
- [48] [Statistics Canada. \*Canadian Community Health Survey\*. Ottawa ON: Statistics Canada; 2007.](#)
- [49] [Muldoon L., Rowan M.S., Geneau R., et al. Models of primary care Service delivery in Ontario: Why such diversity? \*Healthcare Management Forum\* 2006;19\(4\):18-23.](#)
- [50] [Howard M., Goertzen J., Kaczorowski J., et al. Emergency Department and Walk-in Clinic Use in Models of Primary Care Practice with Different After Hours Accessibility in Ontario. \*Health Care Policy\* 2008;4\(1\):73-88.](#)

Formatted: Hyperlink, Do not check spelling or grammar

Formatted: Underline, Do not check spelling or grammar



- [51] Browne A., Smye V., Rodney P., et al. Access to primary care from the perspective of Aboriginal patients at an urban emergency department. *Qualitative Health Research* 2011;21(3):333-348.
- [52] Browne A., Varcoe C., Wong S.T., et al. Closing the health equity gap: Evidence-based strategies for primary health care organizations. *International Journal for Equity in Health* 2012;11(59):1-15.
- [53] Kurtz D.L.M., Nyberg J.C., Van Den Tillaart S., et al. Silencing of voice: An act of structural violence: Urban Aboriginal women speak out about their experiences with health care. *Journal of Aboriginal Health* 2008;4(1):53-63.
- [54] Heimer R. Critical Issues and Further Questions About Respondent-Driven Sampling: Comment on Ramirez-Valles, *et al.* (2005). *AIDS and Behavior* 2005;9(4):403-408.
- [55] Gile K.J., Handcock M.S. Respondent-Driven Sampling: An Assessment of Current Methodology. *Sociological Methodology* 2010;40(1):285-327.
- [56] Heckathorn D. Extensions of respondent-driven sampling: analyzing continuous variables and controlling for differential recruitment. *Sociological Methodology* 2007;37(1):151-208.
- [57] Goel S., Salganik M.J. Assessing respondent-driven sampling. *Proceedings of the National Academy of Sciences of the United States of America* 2010;107(15):6743-6747.
- [58] Wejnert C., Pham H., Krishna N., et al. Estimating design effect and calculating sample size for respondent-driven sampling studies of injection drug users in the United States. *AIDS Behavior* 2012;16(4):797-806.

**Formatted:** Font: Italic, Do not check spelling or grammar

**Formatted:** Indent: Left: 0", Hanging: 0.5", Line spacing: single, Tab stops: 0.38", Right + 0.5", Left + Not at 0.25"

#### Reference List

- ~~(1) Statistics Canada. Aboriginal Peoples in Canada in 2006: Inuit, Métis and First Nations, 2006 Census. Ottawa ON: Ministry of Industry; 2008.~~
- ~~(2) Canadian Institute for Health Research (CIHR). CIHR Guidelines for Health Research Involving Aboriginal People. Ottawa: CIHR; 20097.~~
- ~~(3) National Aboriginal Health Organization (NAHO). Ways of Knowing: A Framework for Health Research. National Aboriginal Health Organization; 2003.~~

- ~~(4) Policy Research Initiative. Not Strangers in these Parts. Urban Aboriginal Peoples. 2003.~~
- ~~(5) Environics Institute. Urban Aboriginal Peoples Study Main Report. Environics Institute; 2010.~~
- ~~(6) Peters E., Andersen C. Indigenous in the City: Contemporary Identities and Cultural Innovation. Vancouver: UBC Press; 2013.~~
- ~~(7) Andersen C. Urban Aboriginality as a Distinctive Identity, in Twelve Parts. In: Peters E., Andersen C., editors. Indigenous in the City: Contemporary Identities and Cultural Innovation. Vancouver: UBC Press; 2013. p. 46.~~
- ~~(8) Garner R., Carrière G., Sanmartin C., Longitudinal Health and Administrative Data Research Team. The Health of First Nations Living Off-Reserve, Inuit, and Métis Adults in Canada: The Impact of Socio-economic Status on Inequalities in Health. Ottawa: Statistics Canada, Health Analysis Division; 2010. Report No.: 82-622-X.~~
- ~~(9) Tait H. Aboriginal Peoples Survey, 2006: Inuit Health and Social Conditions. Ottawa, ON: Statistics Canada; 2008.~~
- ~~(10) Smylie J. Aboriginal infant mortality rate in Canada. Lancet 2012;380(9851):1384.~~
- ~~(11) Anderson M., Smylie J. Performance measurement systems in Canada: How well do they perform in First Nations, Inuit and Métis Contexts? Pimatisiwin: A Journal of Aboriginal and Indigenous Community Health 2009;7(1):99-115.~~
- ~~(12) Smylie J., Fell D., Ohlsson A. A Review of Aboriginal Infant Mortality Rates in Canada: Striking and Persistent Aboriginal and Non-Aboriginal Inequities. Canadian Journal of Public Health 2010;101(2):143-8.~~
- ~~(13) Smylie J., Anderson M. Understanding the health of Indigenous peoples in Canada: key methodologic and conceptual challenges. Canadian Medical Association Journal 2006;165(6):602-5.~~
- ~~(14) Smylie J., Anderson I., Ratima M., Crengle S., Anderson M. Who is Measuring and Why? Indigenous Health Performance Measurement Systems in Canada, Australia, and New Zealand. The Lancet 2006;367:2029-31.~~
- ~~(15) Siggner A.J. The Challenge of Measuring the Demographic and Socio-Economic Conditions of the Urban Aboriginal Population. In: Newhouse D., Peters E., editors. Strangers in these Parts: Urban Aboriginal Peoples. Ottawa: Policy Research Initiative; 2003. p. 119-30.~~
- ~~(16) Smylie J., Lofters A., Firestone M., O'Campo P. Population Based Data and Community Empowerment. In: O'Campo P., Dunn J., editors. Rethinking Social~~

- Epidemiology: Towards a Science of Change. Springer Publishing Company; 2011.
- ~~(17) Graham K.A., Peters E.J. Aboriginal Communities and Urban Sustainability. Ottawa: Canadian Policy Research Networks; 2002.~~
- ~~(18) Anderson M., Smylie J., Anderson I., Sinclair R., Crengle S., Ratima M. First Nations, Métis, and Inuit Health Indicators in Canada. A background paper for the project "Action-oriented indicators of health and health systems development for Indigenous peoples in Canada, Australia, and New Zealand. Saskatoon: Indigenous Peoples Health Research Centre; 2006.~~
- ~~(19) Collier R. Long form census changes worries health researchers. Canadian Medical Association Journal 2010;182(12):E563-E564.~~
- ~~(20) Webster P.C. Aboriginal health programming under siege, critics charge. Canadian Medical Association Journal 2012;184(14):E739-E740.~~
- ~~(21) Heckathorn D. Respondent driven sampling: a new approach to the study of hidden populations. Social Problems 1997;44:174-99.~~
- ~~(22) Heckathorn D. Respondent driven sampling II: Deriving Valid Population Estimates from Chain referral Samples of Hidden Populations. Social Problems 2002;49(1):11-34.~~
- ~~(23) Heckathorn D, Seeman S, Broadhead R, Hugues J. Extensions of Respondent Driven Sampling: A new approach to the Study of Injection Drug Users aged 18-25. AIDS and Behavior 2002;6(1):55-67.~~
- ~~(24) Evans Campbell T., Lindhorts T., Huang B., Walters K.L. Interpersonal Violence in the Lives of Urban American Indian and Alaska Native Women: Implications for Health, Mental Health, and Help Seeking. American Journal of Public Health 2006;96(8):1416-22.~~
- ~~(25) Abdul Quader A., Heckathorn D, Saidel T. Implementation and Analysis of Respondent Driven Sampling: Lessons from the Field. Journal of Urban Health 2006;83(7):1-5.~~
- ~~(26) Greenwood M. Children as citizens of First Nations: Linking Indigenous health to early childhood development. Pediatrics and Child Health 2005;10(9):553-5.~~
- ~~(27) Ermine W. Aboriginal Epistemology. In: Battiste M, Barman J., editors. First Nations Education in Canada: The Circle Unfolds. Vancouver: UBC Press; 1995. p. 101-12.~~
- ~~(28) Smylie J., Kaplan Myrth N., McShane K.E., Métis Nation of Ontario, Pikwakanagan First Nation, Tungasuvvingat Inuit Family Resource Centre. Indigenous Knowledge Translation: Baseline Findings in a Qualitative Study of~~

- 1  
2  
3  
4  
5  
6  
7  
8 the Pathways of Health Knowledge in Three Indigenous Communities in Canada. *Health Promotion Practice* 2009;10(3):436-46.
- 9  
10  
11 ~~(29) Canadian Institute of Health Research, Natural Sciences and Engineering~~  
12 ~~Research Council of Canada, Social Sciences and Humanities Research Council~~  
13 ~~of Canada. Tri-Council Policy Statement: Ethical Conduct for Research Involving~~  
14 ~~Humans. 2010.~~
- 15  
16 ~~(30) Canadian Institute for Health Research (CIHR). CIHR Guidelines for Health~~  
17 ~~Research Involving Aboriginal People. Ottawa: CIHR; 2007.~~
- 18  
19 ~~(31) Ball J., Janyst P. Enacting Research Ethics Partnerships with Indigenous~~  
20 ~~Communities and Canada: "Do it in a Good Way.". *Journal of Empirical Research*~~  
21 ~~on Human Research Ethics 2008;3(2):33-51.~~
- 22  
23 ~~(32) First Nations Centre. First Nations Conceptual Frameworks and Applied Models~~  
24 ~~on Ethics, Privacy, and Consent in Health Research and Information. Ottawa:~~  
25 ~~National Aboriginal Health Organization (NAHO); 2006.~~
- 26  
27 ~~(33) Ontario Federation of Indian Friendship Centres (OFIFC). USAI Utility Self-~~  
28 ~~Voicing Access Inter-relationship Reserach Framework. 2012.~~
- 29  
30 ~~(34) Statistics Canada. Hamilton, Ontario (Code3525005) (table). 2006 Community~~  
31 ~~Profiles. 2006 Census. Ottawa ON: Statistics Canada; 2007. Report No.:~~  
32 ~~Catalogue no. 92-591-XWE.~~
- 33  
34 ~~(35) Salganik M.J. Variance estimation, design effects, and sample size calculations~~  
35 ~~for respondent driven sampling. *Journal of Urban Health* 2006;83(6 (Suppl)):98-~~  
36 ~~112.~~
- 37  
38 ~~(36) Firestone M. Our Health Counts: Unmasking Health and Social Disparities among~~  
39 ~~Urban Aboriginal People in Ontario University of Toronto; 2013.~~
- 40  
41 ~~(37) IBM® SPSS® Data Collection Author [computer program]. Version 6.0.1.~~  
42 ~~Chicago, IL: SPSS Inc.; 2000.~~
- 43  
44 ~~(38) Respondent Driven Sampling Analysis Tool (RDSAT) Version 7.1 [computer~~  
45 ~~program]. Ithaca, New York: Cornell University; 2007.~~
- 46  
47 ~~(39) Wejnert C. An Empirical Test of Respondent Driven Sampling: Point Estimates,~~  
48 ~~Variance, Degree Measures, and Out of Equilibrium Data. *Sociological*~~  
49 ~~Methodology 2009;39(1):73-116.~~
- 50  
51 ~~(40) Firestone M., Smylie J, Maracle S., Siedule C., Pigeau L., De dwa da dehs ney>s~~  
52 ~~Aboriginal Health Access Centre, et al. Concept Mapping: Application of a~~  
53 ~~Community Based Methodology in three Urban Aboriginal Populations.~~  
54 ~~*American Indian Culture and Research Journal*, Under Review 2014;38(4).~~

- 1  
2  
3  
4  
5  
6  
7  
8  
9  
10  
11  
12  
13  
14  
15  
16  
17  
18  
19  
20  
21  
22  
23  
24  
25  
26  
27  
28  
29  
30  
31  
32  
33  
34  
35  
36  
37  
38  
39  
40  
41  
42  
43  
44  
45  
46  
47  
48  
49  
50  
51  
52  
53  
54  
55  
56  
57  
58  
59  
60
- ~~-(41) Statistics Canada. Persons per room of private household. [http://www.statean.gc.ca/concepts/definitions/dwelling\\_logement\\_07\\_eng.html](http://www.statean.gc.ca/concepts/definitions/dwelling_logement_07_eng.html) 2013 Available from: URL: [http://www.statean.gc.ca/concepts/definitions/dwelling\\_logement\\_07\\_eng.html](http://www.statean.gc.ca/concepts/definitions/dwelling_logement_07_eng.html)~~
  - ~~-(42) Statistics Canada no.92-594-XWE. Hamilton, Ontario (Code 3525005) (table). Aboriginal Population Profile. 2006 Census. [http://www12.statean.ca/census-recensement/2006/dp\\_pd/prof/92-594/index.cfm?Lang=E](http://www12.statean.ca/census-recensement/2006/dp_pd/prof/92-594/index.cfm?Lang=E) (accessed January 20, 2014) 2007 [cited 11 A.D. Apr 30];~~
  - ~~-(43) Health Canada. A Statistical Profile on the Health of First Nations in Canada, for the Year 2000. Ottawa; 2005. Report No.: H35-4/30-2000E PDF.~~
  - ~~-(44) Ontario Federation of Indian Friendship Centres (OFIFC), Ontario Métis Aboriginal Association, Ontario Native Women's Association (ONWA). Urban Aboriginal Task Force Final Report. Toronto ON; 2007.~~
  - ~~-(45) McCaskill D., FitzMaurice K., Cidro J. Toronto Aboriginal Research Project (TARP) Final Report. 2011.~~
  - ~~-(46) Statistics Canada. Canadian Community Health Survey. Ottawa ON: Statistics Canada; 2007.~~
  - ~~-(47) Muldoon L., Rowan M.S., Geneau R., Hogg W., Coulson D. Models of primary care Service delivery in Ontario: Why such diversity? Healthcare Management Forum 2006;19(4):18-23.~~
  - ~~-(48) Howard M., Goertzen J., Kaczorowski J., Hutchinson B., Morris K., Thabane L., et al. Emergency Department and Walk-in Clinic Use in Models of Primary Care Practice with Different After Hours Accessibility in Ontario. Health Care Policy 2008;4(1):73-88.~~
  - ~~-(49) Heimer R. Critical Issues and Further Questions About Respondent Driven Sampling: Comment on Ramirez-Valles, et al. (2005). AIDS and Behavior 2005;9(4):403-8.~~
  - ~~-(50) Gile K.J., Handcock M.S. Respondent Driven Sampling: An Assessment of Current Methodology. Sociological Methodology 2010;40(1):285-327.~~
  - ~~-(51) Heckathorn D. Extensions of respondent-driven sampling: analyzing continuous variables and controlling for differential recruitment. Sociological Methodology 2007;37(1):151-208.~~
  - ~~-(52) Goel S., Salganik M.J. Assessing respondent driven sampling. Proceedings of the National Academy of Sciences of the United States of America 2010;107(15):6743-7.~~

1  
2  
3  
4  
5  
6  
7  
8  
9  
10  
11  
12  
13  
14  
15  
16  
17  
18  
19  
20  
21  
22  
23  
24  
25  
26  
27  
28  
29  
30  
31  
32  
33  
34  
35  
36  
37  
38  
39  
40  
41  
42  
43  
44  
45  
46  
47  
48  
49  
50  
51  
52  
53  
54  
55  
56  
57  
58  
59  
60

~~(53) Wejnert C., Pham H., Krishna N., Le B., DiNenno E. Estimating design effect and calculating sample size for respondent driven sampling studies of injection drug users in the United States. AIDS Behavior 2012;16(4):797-806.~~

For peer review only

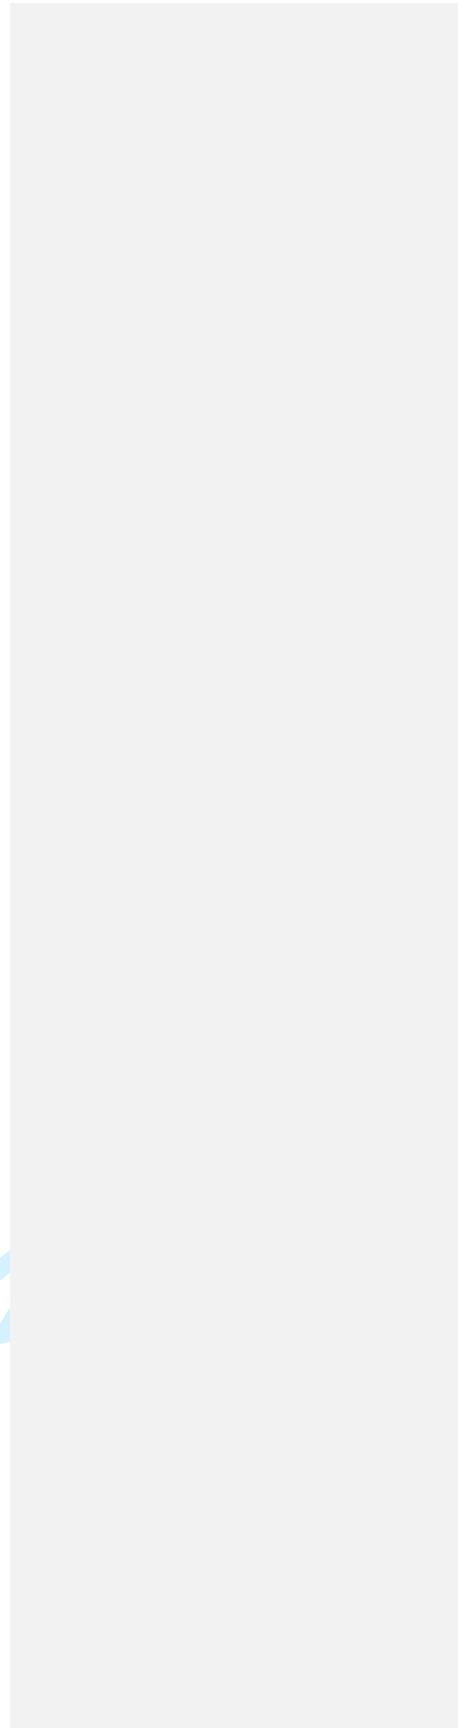

**STROBE 2007 (v4) checklist of items to be included in reports of observational studies in epidemiology\***  
**Checklist for cohort, case-control, and cross-sectional studies (combined)**

| Section/Topic             | Item # | Recommendation                                                                                                                                                                                                                                                                                                                                                                                                                                                         | Reported on page # |
|---------------------------|--------|------------------------------------------------------------------------------------------------------------------------------------------------------------------------------------------------------------------------------------------------------------------------------------------------------------------------------------------------------------------------------------------------------------------------------------------------------------------------|--------------------|
| Title and abstract        | 1      | (a) Indicate the study's design with a commonly used term in the title or the abstract                                                                                                                                                                                                                                                                                                                                                                                 | Yes, in title      |
|                           |        | (b) Provide in the abstract an informative and balanced summary of what was done and what was found                                                                                                                                                                                                                                                                                                                                                                    | Yes, pg 2          |
| <b>Introduction</b>       |        |                                                                                                                                                                                                                                                                                                                                                                                                                                                                        |                    |
| Background/rationale      | 2      | Explain the scientific background and rationale for the investigation being reported                                                                                                                                                                                                                                                                                                                                                                                   | Yes, pg 3-4        |
| Objectives                | 3      | State specific objectives, including any pre-specified hypotheses                                                                                                                                                                                                                                                                                                                                                                                                      | Yes, pg 4          |
| <b>Methods</b>            |        |                                                                                                                                                                                                                                                                                                                                                                                                                                                                        |                    |
| Study design              | 4      | Present key elements of study design early in the paper                                                                                                                                                                                                                                                                                                                                                                                                                | Yes, pg 4-5        |
| Setting                   | 5      | Describe the setting, locations, and relevant dates, including periods of recruitment, exposure, follow-up, and data collection                                                                                                                                                                                                                                                                                                                                        | Yes, pg 5          |
| Participants              | 6      | (a) <i>Cohort study</i> —Give the eligibility criteria, and the sources and methods of selection of participants. Describe methods of follow-up<br><i>Case-control study</i> —Give the eligibility criteria, and the sources and methods of case ascertainment and control selection. Give the rationale for the choice of cases and controls<br><i>Cross-sectional study</i> —Give the eligibility criteria, and the sources and methods of selection of participants | Yes, pg 5          |
|                           |        | (b) <i>Cohort study</i> —For matched studies, give matching criteria and number of exposed and unexposed<br><i>Case-control study</i> —For matched studies, give matching criteria and the number of controls per case                                                                                                                                                                                                                                                 |                    |
| Variables                 | 7      | Clearly define all outcomes, exposures, predictors, potential confounders, and effect modifiers. Give diagnostic criteria, if applicable                                                                                                                                                                                                                                                                                                                               |                    |
| Data sources/ measurement | 8*     | For each variable of interest, give sources of data and details of methods of assessment (measurement). Describe comparability of assessment methods if there is more than one group                                                                                                                                                                                                                                                                                   | Yes, pg 5-6        |
| Bias                      | 9      | Describe any efforts to address potential sources of bias                                                                                                                                                                                                                                                                                                                                                                                                              | Yes, pg 4          |
| Study size                | 10     | Explain how the study size was arrived at                                                                                                                                                                                                                                                                                                                                                                                                                              | Yes, pg 5          |
| Quantitative variables    | 11     | Explain how quantitative variables were handled in the analyses. If applicable, describe which groupings were chosen and why                                                                                                                                                                                                                                                                                                                                           | Yes, pg 6          |
| Statistical methods       | 12     | (a) Describe all statistical methods, including those used to control for confounding                                                                                                                                                                                                                                                                                                                                                                                  | Yes pg 6           |
|                           |        | (b) Describe any methods used to examine subgroups and interactions                                                                                                                                                                                                                                                                                                                                                                                                    |                    |
|                           |        | (c) Explain how missing data were addressed                                                                                                                                                                                                                                                                                                                                                                                                                            |                    |
|                           |        | (d) <i>Cohort study</i> —If applicable, explain how loss to follow-up was addressed<br><i>Case-control study</i> —If applicable, explain how matching of cases and controls was addressed                                                                                                                                                                                                                                                                              |                    |



|                          |     |                                                                                                                                                                                                                                                                                                                                                                                                               |               |
|--------------------------|-----|---------------------------------------------------------------------------------------------------------------------------------------------------------------------------------------------------------------------------------------------------------------------------------------------------------------------------------------------------------------------------------------------------------------|---------------|
|                          |     | <i>Cross-sectional study</i> —If applicable, describe analytical methods taking account of sampling strategy                                                                                                                                                                                                                                                                                                  |               |
|                          |     | (e) Describe any sensitivity analyses                                                                                                                                                                                                                                                                                                                                                                         |               |
| <b>Results</b>           |     |                                                                                                                                                                                                                                                                                                                                                                                                               |               |
| Participants             | 13* | (a) Report numbers of individuals at each stage of study—eg numbers potentially eligible, examined for eligibility, confirmed eligible, included in the study, completing follow-up, and analysed<br>(b) Give reasons for non-participation at each stage<br>(c) Consider use of a flow diagram                                                                                                               |               |
| Descriptive data         | 14* | (a) Give characteristics of study participants (eg demographic, clinical, social) and information on exposures and potential confounders<br>(b) Indicate number of participants with missing data for each variable of interest<br>(c) <i>Cohort study</i> —Summarise follow-up time (eg, average and total amount)                                                                                           | Yes, pg 6-7   |
| Outcome data             | 15* | <i>Cohort study</i> —Report numbers of outcome events or summary measures over time<br><i>Case-control study</i> —Report numbers in each exposure category, or summary measures of exposure<br><i>Cross-sectional study</i> —Report numbers of outcome events or summary measures                                                                                                                             |               |
| Main results             | 16  | (a) Give unadjusted estimates and, if applicable, confounder-adjusted estimates and their precision (eg, 95% confidence interval). Make clear which confounders were adjusted for and why they were included<br>(b) Report category boundaries when continuous variables were categorized<br>(c) If relevant, consider translating estimates of relative risk into absolute risk for a meaningful time period |               |
| Other analyses           | 17  | Report other analyses done—eg analyses of subgroups and interactions, and sensitivity analyses                                                                                                                                                                                                                                                                                                                |               |
| <b>Discussion</b>        |     |                                                                                                                                                                                                                                                                                                                                                                                                               |               |
| Key results              | 18  | Summarise key results with reference to study objectives                                                                                                                                                                                                                                                                                                                                                      | Yes, Pg 9-11  |
| Limitations              | 19  | Discuss limitations of the study, taking into account sources of potential bias or imprecision. Discuss both direction and magnitude of any potential bias                                                                                                                                                                                                                                                    | Yes, Pg 11    |
| Interpretation           | 20  | Give a cautious overall interpretation of results considering objectives, limitations, multiplicity of analyses, results from similar studies, and other relevant evidence                                                                                                                                                                                                                                    | Yes, pg 9-11  |
| Generalisability         | 21  | Discuss the generalisability (external validity) of the study results                                                                                                                                                                                                                                                                                                                                         |               |
| <b>Other information</b> |     |                                                                                                                                                                                                                                                                                                                                                                                                               |               |
| Funding                  | 22  | Give the source of funding and the role of the funders for the present study and, if applicable, for the original study on which the present article is based                                                                                                                                                                                                                                                 | Yes, pg 11-12 |

\*Give information separately for cases and controls in case-control studies and, if applicable, for exposed and unexposed groups in cohort and cross-sectional studies.

**Note:** An Explanation and Elaboration article discusses each checklist item and gives methodological background and published examples of transparent reporting. The STROBE checklist is best used in conjunction with this article (freely available on the Web sites of PLoS Medicine at <http://www.plosmedicine.org/>, Annals of Internal Medicine at <http://www.annals.org/>, and Epidemiology at <http://www.epidem.com/>). Information on the STROBE Initiative is available at [www.strobe-statement.org](http://www.strobe-statement.org).
